# Supplementary material for: Clinical Metagenomics Is Increasingly Accurate and Affordable to Detect Enteric Bacterial Pathogens in Stool
Source: Microorganisms. 2022 Feb 15;10(2):441. doi: 10.3390/microorganisms10020441 (PMC8880012; doi:10.3390/microorganisms10020441)
Supplement: Supplementary file 1 [file microorganisms-10-00441-s001.zip]

Archive with 5 entries (5 files):
- Dataset 1_Results Summary.xlsx
- Dataset 2_Accuracy Calculations.xlsx
- Dataset 3 PERMANOVA_and_post_hoc.xlsx
- Dataset 4 Differential_Abundance_results.xlsx
- Supplementary Figure S1-S3.pdf
