# Supplementary material for: Clinical Metagenomics Is Increasingly Accurate and Affordable to Detect Enteric Bacterial Pathogens in Stool
Source: Microorganisms. 2022 Feb 15;10(2):441. doi: 10.3390/microorganisms10020441 (PMC8880012; doi:10.3390/microorganisms10020441)
Supplement: Supplementary file 1 [file microorganisms-10-00441-s001.zip › Dataset 1_Results Summary.xlsx]

## Sheet: general data
Metadata and results summary
StudyID	Reason4inclusion	Submitter	CultureSummary	EBP_summary	BF_summary	EBP_Campy	BF_Campy	EBP_Salm	BF_Salm	EBP_Shig	BF_Shig	EBP_stx	BF_stx	PCR consensus	PCR compared to culture	EBP compared to BF	Mg_Campy	Mg_Salm	Mg_Shig	Mg_stx	Mg_summary	Patient	IRIDA project #	DNAextractionKit	DNA prep	Sequence Date	Platform	Total GB	Total Bases	microbialreads	Deconned file sizes (bytes)	NP_LR (bytes)	NP_LR (GB)	NP_LRstar (bytes)	NP_LRstar (GB)	%bacteria	%human
14_0001	culture positive	Shared Health	Shig	nd	nd	nd	nd	nd	nd	nd	nd	nd	nd	na	na	na	neg	neg	neg	pos	stx	unique	118	Qiagen stool prep kit	2015-01-12	2015-01-16	MiSeq	26.255	11845331268	23103664	11340002198	2.45607e+09	2.45607	5.30403e+08	0.530403	29.63	63.29
14_0002	culture positive	Shared Health	Campy	nd	nd	nd	nd	nd	nd	nd	nd	nd	nd	na	na	na	pos	neg	neg	neg	Campy	unique	118	Qiagen stool prep kit	2015-01-12	2015-01-21	MiSeq	22.768	10665947129	34728644	19148707938	4.25702e+09	4.25702	5.08842e+08	0.508842	52.44	12.06
14_0003	culture positive	Shared Health	Campy	nd	nd	nd	nd	nd	nd	nd	nd	nd	nd	na	na	na	pos	neg	neg	neg	Campy	unique	118	Qiagen stool prep kit	2015-01-12	2015-01-16	MiSeq	31.072	14361680241	65560140	32369451298	7.04476e+09	7.04476	1.41973e+08	0.141973	77.63	0.78
14_0004	culture positive	Shared Health	Salm	nd	nd	nd	nd	nd	nd	nd	nd	nd	nd	na	na	na	pos	neg	neg	neg	Campy	unique	118	Qiagen stool prep kit	2015-01-12	2015-01-16	MiSeq	18.314	8511178151	37324328	19185669650	4.18008e+09	4.18008	3.96314e+09	3.96314	46.1	0.13
14_0005	culture positive	Shared Health	STEC	nd	nd	nd	nd	nd	nd	nd	nd	nd	nd	na	na	na	neg	pos	neg	neg	Salmonella	unique	118	Qiagen stool prep kit	2015-04-28	2015-05-01	MiSeq	25.779	12051768415	49725056	26851556756	5.95082e+09	5.95082	8.41959e+08	0.841959	66.88	0.79
14_0006	culture positive	Shared Health	Campy	nd	nd	nd	nd	nd	nd	nd	nd	nd	nd	na	na	na	neg	neg	pos	neg	Shigella	unique	118	Qiagen stool prep kit	2015-01-12	2015-01-28	MiSeq	20.822	9612981472	4366370	2234614460	4.91064e+08	0.491064	6.82806e+07	0.0682806	9.25	89.06
17_0012	EBP-culture discordant	CPL	STEC (Shigella neg)	ipa, stx	Campy, Shig, stx	neg	pos	neg	neg	pos	pos	pos	pos	1 conflict (Campy)	discordant	discordant	neg	neg	pos	pos	Shigella, stx	unique	707	Qiagen stool prep kit	2017-10-11	2017-10-16	MiSeq	4.154	1834667981	8415644	3057421440	6.53012e+08	0.653012	1.53071e+09	1.53071	54.19	9.03
14_0008	culture positive	Shared Health	Salm	nd	nd	nd	nd	nd	nd	nd	nd	nd	nd	na	na	na	neg	pos	neg	neg	Salmonella	unique	118	Qiagen stool prep kit	2015-01-12	2015-01-09	MiSeq	26.531	12421856994	50930502	27812361670	6.18263e+09	6.18263	2.74581e+08	0.274581	75.41	0.06
15_0001	culture positive	Shared Health	Salm	nd	nd	nd	nd	nd	nd	nd	nd	nd	nd	na	na	na	neg	pos	neg	neg	Salmonella	unique	118	Qiagen stool prep kit	2015-01-12	2015-01-30	MiSeq	22.31	10385293072	5299608	2982696126	6.63524e+08	0.663524	8.92424e+08	0.892424	9.26	86.4
15_0002	culture positive	Shared Health	Shig	nd	nd	nd	nd	nd	nd	nd	nd	nd	nd	na	na	na	neg	neg	pos	neg	Shigella	unique	118	Qiagen stool prep kit	2015-04-28	2015-05-01	MiSeq	16.233	7544686996	29205940	15496554660	3.42821e+09	3.42821	2.82354e+07	0.0282354	86.19	11.42
17_0022	EBP-culture discordant	CPL	neg	tuf, ipa	Shig	pos	neg	neg	neg	pos	pos	neg	neg	1 conflict (Campy)	discordant	discordant	neg	neg	neg	neg	neg	D	707	Qiagen stool prep kit	2017-10-11	2017-10-16	MiSeq	1.188	556188838	2021572	872362156	2.00177e+08	0.200177	2.35465e+09	2.35465	34.2	0.15
17_0023	EBP-culture discordant	CPL	neg	tuf, ipa	Shig	pos	neg	neg	neg	pos	pos	neg	neg	1 conflict (Campy)	discordant	discordant	neg	neg	neg	neg	neg	D	707	Qiagen stool prep kit	2017-10-11	2017-10-16	MiSeq	8.1	3500429537	19526802	6923740356	1.43799e+09	1.43799	1.49263e+09	1.49263	23.15	0.1
19_0010	EBP-culture discordant	CPL	neg	ipa	neg	neg	neg	neg	neg	pos	neg	neg	neg	1 conflict (Campy)	discordant	discordant	neg	neg	neg	neg	neg	unique	1275	Qiagen stool prep kit	2019-08-08	2019-08-21	NextSeq	4.752	1990522201	11701154	3999825972	7.9689e+08	0.79689	9.87662e+08	0.987662	59.69	0.08
19_0035	culture positive	CPL	STEC	stx	Campy, stx	neg	pos	neg	neg	neg	neg	pos	pos	1 conflict (Campy)	discordant	discordant	pos	neg	neg	pos	Campy, stx	F	1275	Qiagen stool prep kit	2019-10-15	2019-10-30	NextSeq	10.517	4474675122	26994536	9335288166	1.89175e+09	1.89175	3.12823e+09	3.12823	26.54	0.54
19_0036	culture positive	CPL	STEC	stx	Campy, stx	neg	pos	neg	neg	neg	neg	pos	pos	1 conflict (Campy)	discordant	discordant	pos	neg	neg	pos	Campy, stx	F	1275	Qiagen stool prep kit	2019-10-15	2019-10-30	NextSeq	15.1	5989142927	45231112	9058352422	1.8388e+09	1.8388	2.15618e+09	2.15618	37.41	3.14
19_0040	EBP-culture discordant	CPL	neg	tuf	neg	pos	neg	neg	neg	neg	neg	neg	neg	1 conflict (Campy)	discordant	discordant	neg	neg	neg	neg	neg	unique	1275	Qiagen stool prep kit	2019-10-15	2019-10-30	NextSeq	3.275	1379934666	8301764	2869056678	5.75312e+08	0.575312	1.16411e+09	1.16411	70.21	0.04
19_0052	EBP-culture discordant	CPL	neg	tuf	neg	pos	neg	neg	neg	neg	neg	neg	neg	1 conflict (Campy)	discordant	discordant	neg	neg	neg	neg	neg	unique	1275	Qiagen stool prep kit	2019-10-15	2019-10-30	NextSeq	2.492	1055315855	6204492	2174462634	4.37587e+08	0.437587	1.46007e+09	1.46007	71.09	0.01
19_0059	culture negative	CPL	neg	neg	Campy	neg	pos	neg	neg	neg	neg	neg	neg	1 conflict (Campy)	discordant	discordant	pos	neg	neg	neg	Campy	unique	1275	Qiagen stool prep kit	2019-10-15	2019-10-30	NextSeq	1.757	745026007	4283258	1500072708	3.03799e+08	0.303799	2.57814e+09	2.57814	52.26	0.05
19_0077	EBP-culture discordant	CPL	neg	tuf	neg	pos	neg	neg	neg	neg	neg	neg	neg	1 conflict (Campy)	discordant	discordant	neg	neg	neg	neg	neg	unique	1275	Qiagen stool prep kit	2019-10-15	2019-10-30	NextSeq	5.566	2344712451	14363688	4968854752	9.90771e+08	0.990771	9.43161e+08	0.943161	60.3	0.04
19_0082	EBP-culture discordant	CPL	neg	tuf	neg	pos	neg	neg	neg	neg	neg	neg	neg	1 conflict (Campy)	discordant	discordant	neg	neg	neg	neg	neg	unique	1275	Qiagen stool prep kit	2019-10-15	2019-10-30	NextSeq	3.516	1487624261	8857160	3101671478	6.21414e+08	0.621414	3.26026e+08	0.326026	65.62	0.04
19_0090	EBP-culture discordant	CPL	neg	tuf	neg	pos	neg	neg	neg	neg	neg	neg	neg	1 conflict (Campy)	discordant	discordant	neg	neg	neg	neg	neg	unique	1275	Qiagen stool prep kit	2019-10-15	2019-10-30	NextSeq	3.524	1491579808	8864598	3108750368	6.25805e+08	0.625805	4.80098e+08	0.480098	74.02	0.18
19_0092	EBP-culture discordant	CPL	neg	tuf	neg	pos	neg	neg	neg	neg	neg	neg	neg	1 conflict (Campy)	discordant	discordant	neg	neg	neg	neg	neg	unique	1275	Qiagen stool prep kit	2019-10-15	2019-10-30	NextSeq	2.67	1088967243	7416366	2371023010	4.62533e+08	0.462533	2.92618e+09	2.92618	36.81	0.51
19_0103	EBP-culture discordant	CPL	neg	tuf	neg	pos	neg	neg	neg	neg	neg	neg	neg	1 conflict (Campy)	discordant	discordant	neg	neg	neg	neg	neg	unique	1275	Qiagen stool prep kit	2020-01-15	2020-01-24	NextSeq	1.277	541360064	3305674	1179421348	2.3926e+08	0.23926	5.18606e+09	5.18606	43.71	0.06
19_0105	EBP-culture discordant	CPL	neg	tuf	neg	pos	neg	neg	neg	neg	neg	neg	neg	1 conflict (Campy)	discordant	discordant	neg	neg	neg	neg	neg	unique	1275	Qiagen stool prep kit	2020-01-16	2020-01-24	NextSeq	0.985	417829122	2571872	918561438	1.86276e+08	0.186276	3.88478e+09	3.88478	20.03	0.11
19_0123	EBP-culture discordant	CPL	neg	tuf	neg	pos	neg	neg	neg	neg	neg	neg	neg	1 conflict (Campy)	discordant	discordant	neg	neg	neg	neg	neg	unique	1275	Qiagen stool prep kit	2020-01-17	2020-01-24	NextSeq	0.957	405887615	2487432	887295478	1.80076e+08	0.180076	3.59329e+08	0.359329	78.28	0.12
19_0138	EBP-culture discordant	CPL	neg	tuf	neg	pos	neg	neg	neg	neg	neg	neg	neg	1 conflict (Campy)	discordant	discordant	neg	neg	neg	neg	neg	unique	1275	Qiagen stool prep kit	2020-01-20	2020-01-24	NextSeq	1.965	825909495	5274270	1833663474	3.69141e+08	0.369141	5.23759e+08	0.523759	68.84	0.08
19_0037	EBP-culture discordant	CPL	neg	spa	neg	neg	neg	pos	neg	neg	neg	neg	neg	1 conflict (Salm)	discordant	discordant	neg	neg	neg	neg	neg	unique	1275	Qiagen stool prep kit	2019-10-15	2019-10-30	NextSeq	2.063	873097390	50904562	1781594080	3.58914e+08	0.358914	4.50482e+09	4.50482	46.03	0.06
17_0008	EBP-culture discordant	CPL	STEC	neg	stx	neg	neg	neg	neg	neg	neg	neg	pos	1 conflict (stx)	discordant	discordant	neg	neg	neg	neg	neg	unique	707	Qiagen stool prep kit	2017-10-11	2017-10-16	MiSeq	11.806	5084675186	16205992	5825003234	1.21877e+09	1.21877	3.39515e+09	3.39515	44.96	2.8
19_0099	EBP-culture discordant	CPL	neg	ipa	stx	neg	neg	neg	neg	pos	neg	neg	pos	2 conflicts (Shig, stx)	discordant	discordant	neg	neg	neg	pos	stx	unique	1275	Qiagen stool prep kit	2020-01-15	2020-01-24	NextSeq	0.792	336483651	2034206	726429854	1.47456e+08	0.147456	6.09977e+09	6.09977	50.24	0.08
19_0115	EBP-culture discordant	CPL	neg	ipa	stx	neg	neg	neg	neg	pos	neg	neg	pos	2 conflicts (Shig, stx)	discordant	discordant	neg	neg	neg	neg	neg	unique	1275	Qiagen stool prep kit	2020-01-16	2020-01-24	NextSeq	2.335	980382280	6297540	2190131894	4.39638e+08	0.439638	1.07944e+10	10.7944	34.94	0.84
17_0014	culture positive	CPL	Campy	tuf	nd	pos	nd	neg	nd	neg	nd	neg	nd	Campy	concordant	na	pos	neg	neg	neg	Campy	unique	707	Qiagen stool prep kit	2017-10-11	2017-10-16	MiSeq	0.517	233075919	321060	132415370	3.03256e+07	0.0303256	5.03259e+08	0.503259	22.77	69.34
19_0007	culture positive	CPL	Campy	tuf	nd	pos	nd	neg	nd	neg	nd	neg	nd	Campy	concordant	na	pos	neg	neg	neg	Campy	unique	1275	Qiagen stool prep kit	2019-06-20	2019-07-18	MiSeq	7.241	3207628627	16876028	6313672074	1.33243e+09	1.33243	4.14168e+08	0.414168	61.08	0.07
19_0012	culture positive	CPL	Campy	tuf	nd	pos	nd	neg	nd	neg	nd	neg	nd	Campy	concordant	na	pos	neg	neg	neg	Campy	unique	1275	Qiagen stool prep kit	2019-08-08	2019-08-21	NextSeq	4.83	2033786236	11062562	3833609138	7.69595e+08	0.769595	4.83034e+08	0.483034	75.76	4.91
19_0015	culture positive	CPL	Campy	tuf	nd	pos	nd	neg	nd	neg	nd	neg	nd	Campy	concordant	na	pos	neg	neg	neg	Campy	unique	1275	Qiagen power soil fecal kit	2019-08-08	2019-08-21	NextSeq	3.093	1294841165	7045174	2363824156	4.74288e+08	0.474288	1.32221e+09	1.32221	66.44	2.51
19_0017	culture positive	CPL	Campy	tuf	nd	pos	nd	neg	nd	neg	nd	neg	nd	Campy	concordant	na	pos	neg	neg	neg	Campy	unique	1275	Qiagen stool prep kit	2019-08-08	2019-08-21	NextSeq	10.394	4388013074	1433726	496845486	9.9806e+07	0.099806	8.38621e+08	0.838621	5.02	92.36
19_0020	culture positive	CPL	Campy	tuf	nd	pos	nd	neg	nd	neg	nd	neg	nd	Campy	concordant	na	pos	neg	neg	neg	Campy	unique	1275	Qiagen stool prep kit	2019-08-08	2019-08-21	NextSeq	6.067	2559757157	1604572	558101972	1.12449e+08	0.112449	5.95609e+08	0.595609	10.12	86.73
19_0025	culture positive	CPL	Campy	tuf	nd	pos	nd	neg	nd	neg	nd	neg	nd	Campy	concordant	na	pos	neg	neg	neg	Campy	unique	1275	Qiagen power soil fecal kit	2019-08-08	2019-08-21	NextSeq	3.655	1543306051	8506310	2941430908	5.91401e+08	0.591401	2.44783e+09	2.44783	54.07	0.08
19_0027	culture positive	CPL	Campy	tuf	nd	pos	nd	neg	nd	neg	nd	neg	nd	Campy	concordant	na	pos	neg	neg	neg	Campy	E	1275	Qiagen stool prep kit	2019-08-08	2019-08-21	NextSeq	4	1683680002	9296970	3219096554	6.45442e+08	0.645442	1.23945e+08	0.123945	54.02	3.05
19_0028	culture positive	CPL	Campy	tuf	nd	pos	nd	neg	nd	neg	nd	neg	nd	Campy	concordant	na	pos	neg	neg	neg	Campy	E	1275	Qiagen stool prep kit	2019-08-08	2019-08-21	NextSeq	6.996	2936611215	16820060	5800781472	1.15955e+09	1.15955	7.16053e+08	0.716053	43.14	2.41
19_0042	culture positive	CPL	Campy	tuf	nd	pos	nd	neg	nd	neg	nd	neg	nd	Campy	concordant	na	pos	neg	neg	neg	Campy	unique	1275	Qiagen stool prep kit	2019-10-15	2019-10-30	NextSeq	2.103	891793118	883354	308408290	6.24827e+07	0.0624827	3.64253e+08	0.364253	15.31	80.77
19_0048	culture positive	CPL	Campy	tuf	nd	pos	nd	neg	nd	neg	nd	neg	nd	Campy	concordant	na	pos	neg	neg	neg	Campy	unique	1275	Qiagen stool prep kit	2019-10-15	2019-10-30	NextSeq	3.233	1369184982	8026088	2811092164	5.67384e+08	0.567384	2.53281e+08	0.253281	86.38	0.14
19_0054	culture positive	CPL	Campy	tuf	nd	pos	nd	neg	nd	neg	nd	neg	nd	Campy	concordant	na	pos	neg	neg	neg	Campy	unique	1275	Qiagen stool prep kit	2019-10-15	2019-10-30	NextSeq	3.025	1280814507	7534276	2635584462	5.30187e+08	0.530187	3.63783e+08	0.363783	69.5	0.16
19_0055	culture positive	CPL	Campy	tuf	nd	pos	nd	neg	nd	neg	nd	neg	nd	Campy	concordant	na	pos	neg	neg	neg	Campy	unique	1275	Qiagen stool prep kit	2019-10-15	2019-10-30	NextSeq	2.987	1256887072	7595008	2619655866	5.23592e+08	0.523592	4.0314e+08	0.40314	84.4	0.14
19_0057	culture positive	CPL	Campy	tuf	Campy	pos	pos	neg	neg	neg	neg	neg	neg	Campy	concordant	concordant	neg	neg	neg	neg	neg	unique	1275	Qiagen stool prep kit	2019-10-15	2019-10-30	NextSeq	9.713	4128152155	24845870	8494250750	1.72029e+09	1.72029	4.46188e+09	4.46188	37.04	0.4
19_0060	culture positive	CPL	Campy	tuf	nd	pos	nd	neg	nd	neg	nd	neg	nd	Campy	concordant	na	pos	neg	neg	neg	Campy	unique	1275	Qiagen stool prep kit	2019-10-15	2019-10-30	NextSeq	2.5	1058698445	6222014	2182036410	4.40217e+08	0.440217	1.19085e+09	1.19085	68.07	0.15
19_0063	culture positive	CPL	Campy	tuf	nd	pos	nd	neg	nd	neg	nd	neg	nd	Campy	concordant	na	pos	neg	neg	neg	Campy	unique	1275	Qiagen stool prep kit	2019-10-15	2019-10-30	NextSeq	2.597	1099911294	6395056	2235235472	4.46659e+08	0.446659	2.80918e+09	2.80918	48.56	0.73
15_0039	1yr_random	Shared Health	Campy	nd	nd	nd	nd	nd	nd	nd	nd	nd	nd	na	na	na	pos	neg	neg	neg	Campy	unique	353	combination	2017-01-25	2017-01-26	MiSeq	5.606	2651639652	538346	324156124	7.29276e+07	0.0729276	2.87263e+09	2.87263	9.14	85.77
19_0064	culture positive	CPL	Campy	tuf	nd	pos	nd	neg	nd	neg	nd	neg	nd	Campy	concordant	na	pos	neg	neg	neg	Campy	unique	1275	Qiagen stool prep kit	2019-10-15	2019-10-30	NextSeq	1.602	678931102	447416	156888194	3.1584e+07	0.031584	4.63119e+09	4.63119	7.53	86.95
19_0067	culture positive	CPL	Campy	tuf	nd	pos	nd	neg	nd	neg	nd	neg	nd	Campy	concordant	na	pos	neg	neg	neg	Campy	unique	1275	Qiagen stool prep kit	2019-10-15	2019-10-30	NextSeq	4.406	1859074526	10839576	3770750490	7.5767e+08	0.75767	9.90465e+07	0.0990465	29.62	2.83
19_0070	culture positive	CPL	Campy	tuf	nd	pos	nd	neg	nd	neg	nd	neg	nd	Campy	concordant	na	pos	neg	neg	neg	Campy	unique	1275	Qiagen stool prep kit	2020-01-15	2020-01-24	NextSeq	2.142	900357058	5733202	1993785562	4.01009e+08	0.401009	3.80448e+09	3.80448	53.44	0.92
19_0078	culture positive	CPL	Campy	tuf	Campy	pos	pos	neg	neg	neg	neg	neg	neg	Campy	concordant	concordant	pos	neg	neg	neg	Campy	K	1275	Qiagen stool prep kit	2019-10-15	2019-10-30	NextSeq	6.218	2610206060	14335290	4973481602	9.93099e+08	0.993099	2.64659e+08	0.264659	81.69	11.94
19_0079	culture positive	CPL	Campy	tuf	nd	pos	nd	neg	nd	neg	nd	neg	nd	Campy	concordant	na	pos	neg	neg	neg	Campy	K	1275	Qiagen stool prep kit	2019-10-15	2019-10-30	NextSeq	5.243	2204328724	3269766	1144320832	2.29816e+08	0.229816	6.20342e+08	0.620342	19.84	73.79
19_0081	culture positive	CPL	Campy	tuf	nd	pos	nd	neg	nd	neg	nd	neg	nd	Campy	concordant	na	pos	neg	neg	neg	Campy	K	1275	Qiagen stool prep kit	2019-10-15	2019-10-30	NextSeq	4.188	1760866036	9853070	3404718480	6.79428e+08	0.679428	1.40306e+08	0.140306	84.82	8.99
19_0094	culture positive	CPL	Campy	tuf	nd	pos	nd	neg	nd	neg	nd	neg	nd	Campy	concordant	na	pos	neg	neg	neg	Campy	unique	1275	Qiagen stool prep kit	2020-01-15	2020-01-24	NextSeq	1.585	670521630	4102584	1450339508	2.9427e+08	0.29427	1.6983e+09	1.6983	59.36	0.49
19_0097	culture positive	CPL	Campy	tuf	Campy	pos	pos	neg	neg	neg	neg	neg	neg	Campy	concordant	concordant	pos	neg	neg	neg	Campy	unique	1275	Qiagen stool prep kit	2020-01-15	2020-01-24	NextSeq	1.278	541323933	3253600	1156533044	2.34396e+08	0.234396	3.61728e+07	0.0361728	96.88	1.66
19_0098	culture positive	CPL	Campy	tuf	nd	pos	nd	neg	nd	neg	nd	neg	nd	Campy	concordant	na	pos	neg	neg	neg	Campy	unique	1275	Qiagen stool prep kit	2020-01-15	2020-01-24	NextSeq	10.108	4310030878	26071442	8963979178	1.82044e+09	1.82044	5.75774e+08	0.575774	60.54	1.7
19_0100	culture positive	CPL	Campy	tuf	nd	pos	nd	neg	nd	neg	nd	neg	nd	Campy	concordant	na	pos	neg	neg	neg	Campy	unique	1275	Qiagen stool prep kit	2020-01-15	2020-01-24	NextSeq	2.188	924753868	5758772	2040379248	4.11899e+08	0.411899	1.06296e+09	1.06296	55.55	0.39
19_0101	culture positive	CPL	Campy	tuf	nd	pos	nd	neg	nd	neg	nd	neg	nd	Campy	concordant	na	pos	neg	neg	neg	Campy	unique	1275	Qiagen stool prep kit	2020-01-15	2020-01-24	NextSeq	5.058	2163427937	12817094	4403805620	8.97741e+08	0.897741	2.99254e+09	2.99254	37.35	2.86
15_0051	1yr_random	Shared Health	Salm	nd	nd	nd	nd	nd	nd	nd	nd	nd	nd	na	na	na	neg	pos	neg	neg	Salmonella	unique	353	combination	2017-01-25	2017-01-26	MiSeq	4.034	1905443607	3955488	2323871558	5.20837e+08	0.520837	1.64622e+08	0.164622	89.14	1.07
19_0104	culture positive	CPL	Campy	tuf	nd	pos	nd	neg	nd	neg	nd	neg	nd	Campy	concordant	na	pos	neg	neg	neg	Campy	unique	1275	Qiagen stool prep kit	2020-01-16	2020-01-24	NextSeq	1.321	560209943	145994	51748316	1.05313e+07	0.0105313	1.4279e+09	1.4279	4.14	93.3
19_0107	culture positive	CPL	Campy	tuf	nd	pos	nd	neg	nd	neg	nd	neg	nd	Campy	concordant	na	pos	neg	neg	neg	Campy	unique	1275	Qiagen stool prep kit	2020-01-16	2020-01-24	NextSeq	1.577	667736446	4135690	1472886876	2.98036e+08	0.298036	2.055e+09	2.055	61.86	0.07
15_0054	1yr_random	Shared Health	Salm	nd	nd	nd	nd	nd	nd	nd	nd	nd	nd	na	na	na	neg	pos	neg	neg	Salmonella	unique	353	combination	2017-01-25	2017-01-26	MiSeq	7.426	3497822714	3942140	2251352816	5.01072e+08	0.501072	1.88541e+09	1.88541	68.16	1.46
19_0109	culture positive	CPL	Campy	tuf	nd	pos	nd	neg	nd	neg	nd	neg	nd	Campy	concordant	na	pos	neg	neg	neg	Campy	unique	1275	Qiagen stool prep kit	2020-01-16	2020-01-24	NextSeq	1.08	467432753	2809116	987977524	2.0452e+08	0.20452	1.54275e+09	1.54275	33.83	1.9
19_0110	culture positive	CPL	Campy	tuf	nd	pos	nd	neg	nd	neg	nd	neg	nd	Campy	concordant	na	pos	neg	neg	neg	Campy	unique	1275	Qiagen stool prep kit	2020-01-16	2020-01-24	NextSeq	1.114	480911057	957446	336555140	6.96092e+07	0.0696092	9.03765e+10	90.3765	19.95	65.65
19_0111	culture positive	CPL	Campy	tuf	nd	pos	nd	neg	nd	neg	nd	neg	nd	Campy	concordant	na	pos	neg	neg	neg	Campy	unique	1275	Qiagen stool prep kit	2020-01-16	2020-01-24	NextSeq	1.104	465963235	2945236	1038496712	2.09399e+08	0.209399	4.46344e+08	0.446344	87.96	0.12
19_0112	culture positive	CPL	Campy	tuf	nd	pos	nd	neg	nd	neg	nd	neg	nd	Campy	concordant	na	pos	neg	neg	neg	Campy	unique	1275	Qiagen stool prep kit	2020-01-16	2020-01-24	NextSeq	1.549	656719198	4033974	1438927936	2.91487e+08	0.291487	8.24411e+08	0.824411	78.01	0.08
19_0120	culture positive	CPL	Campy	tuf	nd	pos	nd	neg	nd	neg	nd	neg	nd	Campy	concordant	na	pos	neg	neg	neg	Campy	unique	1275	Qiagen stool prep kit	2020-01-17	2020-01-24	NextSeq	1.222	518360076	2852290	1017218346	2.06503e+08	0.206503	1.89744e+09	1.89744	58.26	9.63
19_0121	culture positive	CPL	Campy	tuf	nd	pos	nd	neg	nd	neg	nd	neg	nd	Campy	concordant	na	pos	neg	neg	neg	Campy	unique	1275	Qiagen stool prep kit	2020-01-17	2020-01-24	NextSeq	0.946	401307652	1429322	508340152	1.03348e+08	0.103348	2.1756e+09	2.1756	37.09	40.14
19_0126	culture positive	CPL	Campy	tuf	nd	pos	nd	neg	nd	neg	nd	neg	nd	Campy	concordant	na	pos	neg	neg	neg	Campy	unique	1275	Qiagen stool prep kit	2020-01-17	2020-01-24	NextSeq	0.79	343195857	2072714	726424132	1.51382e+08	0.151382	1.01205e+09	1.01205	71.63	0.08
19_0127	culture positive	CPL	Campy	tuf	nd	pos	nd	neg	nd	neg	nd	neg	nd	Campy	concordant	na	pos	neg	neg	neg	Campy	unique	1275	Qiagen stool prep kit	2020-01-17	2020-01-24	NextSeq	0.825	350075930	2041324	726907996	1.48134e+08	0.148134	7.20927e+07	0.0720927	89.21	3
19_0130	culture positive	CPL	Campy	tuf	nd	pos	nd	neg	nd	neg	nd	neg	nd	Campy	concordant	na	pos	neg	neg	neg	Campy	unique	1275	Qiagen stool prep kit	2020-01-20	2020-01-24	NextSeq	2.517	1111009077	7039864	2386196048	5.03526e+08	0.503526	8.08425e+08	0.808425	76.29	0.38
19_0135	culture positive	CPL	Campy	tuf	nd	pos	nd	neg	nd	neg	nd	neg	nd	Campy	concordant	na	pos	neg	neg	neg	Campy	unique	1275	Qiagen stool prep kit	2020-01-20	2020-01-24	NextSeq	1.398	591215613	3640172	1285790272	2.60487e+08	0.260487	7.41937e+08	0.741937	77.28	0.62
19_0137	culture positive	CPL	Campy	tuf	nd	pos	nd	neg	nd	neg	nd	neg	nd	Campy	concordant	na	pos	neg	neg	neg	Campy	unique	1275	Qiagen stool prep kit	2020-01-20	2020-01-24	NextSeq	2.166	909189895	5598628	1946970800	3.91834e+08	0.391834	8.34667e+08	0.834667	58.48	4.27
19_0141	culture positive	CPL	Campy	tuf	nd	pos	nd	neg	nd	neg	nd	neg	nd	Campy	concordant	na	pos	neg	neg	neg	Campy	unique	1275	Qiagen stool prep kit	2020-01-21	2020-01-24	NextSeq	0.855	368122127	2213404	780672334	1.61437e+08	0.161437	2.98219e+09	2.98219	66.08	0.17
19_0144	culture positive	CPL	Campy	tuf	nd	pos	nd	neg	nd	neg	nd	neg	nd	Campy	concordant	na	pos	neg	neg	neg	Campy	unique	1275	Qiagen stool prep kit	2020-01-21	2020-01-24	NextSeq	0.966	409844324	2250028	801637424	1.63326e+08	0.163326	1.89518e+09	1.89518	60.22	8.72
19_0145	culture positive	CPL	Campy	tuf	nd	pos	nd	neg	nd	neg	nd	neg	nd	Campy	concordant	na	pos	neg	neg	neg	Campy	unique	1275	Qiagen stool prep kit	2020-01-21	2020-01-24	NextSeq	1.075	456064548	2757692	981926780	1.99828e+08	0.199828	3.03886e+08	0.303886	75.38	0.12
19_0147	culture positive	CPL	Campy	tuf	nd	pos	nd	neg	nd	neg	nd	neg	nd	Campy	concordant	na	pos	neg	neg	neg	Campy	unique	1275	Qiagen stool prep kit	2020-01-21	2020-01-24	NextSeq	0.901	382308349	1074274	382031456	7.80175e+07	0.0780175	1.52881e+09	1.52881	34.44	51.67
15_0025	1yr_random	Shared Health	neg	nd	Campy	nd	pos	nd	neg	nd	neg	nd	neg	Campy	discordant	na	neg	neg	neg	neg	neg	unique	353	Zymo stool prep kit	2016-05-16	2016-06-09	MiSeq	4.523	1943068702	11688272	4276299454	8.76468e+08	0.876468	7.49077e+08	0.749077	67.8	0.12
17_0019	EBP-culture discordant	CPL	neg	tuf	Campy	pos	pos	neg	neg	neg	neg	neg	neg	Campy	discordant	concordant	pos	neg	neg	neg	Campy	unique	707	Qiagen stool prep kit	2017-10-11	2017-10-16	MiSeq	0.475	224008882	663600	302106620	7.1256e+07	0.071256	9.07233e+08	0.907233	25.85	10.71
19_0014	EBP-culture discordant	CPL	neg	tuf	Campy	pos	pos	neg	neg	neg	neg	neg	neg	Campy	discordant	concordant	pos	neg	neg	neg	Campy	unique	1275	Qiagen power soil fecal kit	2019-08-08	2019-08-21	NextSeq	3.76	1575160293	9065326	3077969452	6.15173e+08	0.615173	1.3697e+09	1.3697	42.89	0.33
19_0016	EBP-culture discordant	CPL	neg	tuf	Campy	pos	pos	neg	neg	neg	neg	neg	neg	Campy	discordant	concordant	pos	neg	neg	neg	Campy	unique	1275	Qiagen power soil fecal kit	2019-08-08	2019-08-21	NextSeq	4.951	2089144087	11313964	3905558390	7.90258e+08	0.790258	3.47128e+09	3.47128	50.1	0.06
19_0043	EBP-culture discordant	CPL	neg	tuf	Campy	pos	pos	neg	neg	neg	neg	neg	neg	Campy	discordant	concordant	pos	neg	neg	neg	Campy	unique	1275	Qiagen stool prep kit	2019-10-15	2019-10-30	NextSeq	4.045	1693495163	10123786	3448431138	6.84165e+08	0.684165	2.23336e+08	0.223336	44.2	5.94
19_0047	EBP-culture discordant	CPL	neg	tuf	Campy	pos	pos	neg	neg	neg	neg	neg	neg	Campy	discordant	concordant	neg	neg	neg	neg	neg	unique	1275	Qiagen stool prep kit	2019-10-15	2019-10-30	NextSeq	3.01	1273476398	7477686	2610678422	5.26616e+08	0.526616	1.35193e+09	1.35193	56.6	0.11
19_0050	EBP-culture discordant	CPL	neg	tuf	Campy	pos	pos	neg	neg	neg	neg	neg	neg	Campy	discordant	concordant	pos	neg	neg	neg	Campy	unique	1275	Qiagen stool prep kit	2019-10-15	2019-10-30	NextSeq	2.352	996735957	5603050	1956379128	3.9801e+08	0.39801	5.37224e+08	0.537224	37.82	0.16
19_0058	EBP-culture discordant	CPL	neg	tuf	Campy	pos	pos	neg	neg	neg	neg	neg	neg	Campy	discordant	concordant	pos	neg	neg	neg	Campy	unique	1275	Qiagen stool prep kit	2019-10-15	2019-10-30	NextSeq	4.832	2013207090	12794808	4303937680	8.5493e+08	0.85493	8.85613e+07	0.0885613	33.92	0.81
19_0080	EBP-culture discordant	CPL	neg	tuf	Campy	pos	pos	neg	neg	neg	neg	neg	neg	Campy	discordant	concordant	pos	neg	neg	neg	Campy	unique	1275	Qiagen stool prep kit	2019-10-15	2019-10-30	NextSeq	2.806	1188614067	4638456	1629133088	3.27053e+08	0.327053	2.6012e+09	2.6012	27.66	33.2
19_0102	EBP-culture discordant	CPL	neg	tuf	Campy	pos	pos	neg	neg	neg	neg	neg	neg	Campy	discordant	concordant	neg	neg	neg	neg	neg	unique	1275	Qiagen stool prep kit	2020-01-15	2020-01-24	NextSeq	1.797	761547462	4660148	1662502244	3.3749e+08	0.33749	5.04836e+08	0.504836	54.32	0.08
19_0113	EBP-culture discordant	CPL	neg	tuf	Campy	pos	pos	neg	neg	neg	neg	neg	neg	Campy	discordant	concordant	neg	neg	neg	neg	neg	unique	1275	Qiagen stool prep kit	2020-01-16	2020-01-24	NextSeq	1.403	595274236	3634684	1297375184	2.63287e+08	0.263287	2.45099e+08	0.245099	67.96	0.13
19_0118	EBP-culture discordant	CPL	neg	tuf	Campy	pos	pos	neg	neg	neg	neg	neg	neg	Campy	discordant	concordant	pos	neg	neg	neg	Campy	unique	1275	Qiagen stool prep kit	2020-01-17	2020-01-24	NextSeq	2.45	1085860208	5766502	1970907970	4.17552e+08	0.417552	3.57563e+08	0.357563	58.12	16.8
19_0129	EBP-culture discordant	CPL	neg	tuf	Campy	pos	pos	neg	neg	neg	neg	neg	neg	Campy	discordant	concordant	pos	neg	neg	neg	Campy	unique	1275	Qiagen stool prep kit	2020-01-20	2020-01-24	NextSeq	1.644	693671173	4355996	1530855172	3.09178e+08	0.309178	2.00473e+09	2.00473	53.03	0.11
19_0131	EBP-culture discordant	CPL	neg	tuf	Campy	pos	pos	neg	neg	neg	neg	neg	neg	Campy	discordant	concordant	neg	neg	neg	neg	neg	unique	1275	Qiagen stool prep kit	2020-01-20	2020-01-24	NextSeq	1.674	707764430	4386864	1549413850	3.13878e+08	0.313878	1.23817e+09	1.23817	59.66	0.25
19_0132	EBP-culture discordant	CPL	neg	tuf	Campy	pos	pos	neg	neg	neg	neg	neg	neg	Campy	discordant	concordant	pos	neg	neg	neg	Campy	unique	1275	Qiagen stool prep kit	2020-01-20	2020-01-24	NextSeq	2.942	1239354601	7882334	2765102202	5.56946e+08	0.556946	3.75684e+09	3.75684	42.5	0.07
19_0146	EBP-culture discordant	CPL	neg	tuf	Campy	pos	pos	neg	neg	neg	neg	neg	neg	Campy	discordant	concordant	pos	neg	neg	neg	Campy	unique	1275	Qiagen stool prep kit	2020-01-21	2020-01-24	NextSeq	1.209	512774607	3087768	1100285760	2.23618e+08	0.223618	1.07737e+09	1.07737	69.31	1.23
19_0021	EBP-culture discordant	CPL	Salm	tuf, spa	Campy, Salm	pos	pos	pos	pos	neg	neg	neg	neg	Campy, Salmonella	discordant	concordant	pos	pos	neg	neg	Campy, Salm	unique	1275	Qiagen stool prep kit	2019-08-08	2019-08-21	NextSeq	5.672	2386489679	13731968	4726055510	9.44437e+08	0.944437	3.7268e+08	0.37268	84.48	0.15
19_0006	culture positive	CPL	Campy and STEC	tuf, stx	nd	pos	nd	neg	nd	neg	nd	pos	nd	Campy, stx	concordant	na	pos	neg	neg	pos	Campy, stx	unique	1275	Qiagen stool prep kit	2019-06-20	2019-06-25	MiSeq	2.816	1328255945	4015306	2066137918	4.82174e+08	0.482174	9.17905e+08	0.917905	56.08	12.3
19_0008	EBP-indeterminate	CPL	neg	ind	neg	ind	neg	ind	neg	ind	neg	ind	neg	ind-->neg	concordant	ind-->neg	neg	neg	neg	neg	neg	unique	1275	Qiagen stool prep kit	2019-06-20	2019-06-25	MiSeq	6.244	2942163954	9891796	5069963898	1.18685e+09	1.18685	9.7549e+08	0.97549	52.28	0.06
19_0088	EBP-indeterminate	CPL	neg	ind	neg	ind	neg	ind	neg	ind	neg	ind	neg	ind-->neg	concordant	ind-->neg	neg	neg	neg	neg	neg	unique	1275	Qiagen stool prep kit	2019-10-15	2019-10-30	NextSeq	1.97	835455394	4736180	1654354522	3.35928e+08	0.335928	8.06615e+07	0.0806615	80.75	0.17
19_0114	EBP-indeterminate	CPL	neg	ind	neg	ind	neg	ind	neg	ind	neg	ind	neg	ind-->neg	concordant	ind-->neg	neg	neg	neg	neg	neg	unique	1275	Qiagen stool prep kit	2020-01-16	2020-01-24	NextSeq	1.871	791196175	4930534	1747423838	3.53147e+08	0.353147	3.97839e+09	3.97839	41.52	0.07
19_0053	EBP-indeterminate	CPL	Salm	ind	Salm, stx	ind	neg	ind	pos	ind	neg	ind	pos	ind-->pos	concordant	ind-->pos	neg	pos	neg	neg	Salmonella	unique	1275	Qiagen stool prep kit	2019-10-15	2019-10-30	NextSeq	11.622	4957935249	30151100	10423515462	2.12108e+09	2.12108	4.31303e+07	0.0431303	17.1	0.16
15_0003	1yr_random	Shared Health	neg	nd	neg	nd	neg	nd	neg	nd	neg	nd	neg	neg	concordant	na	neg	neg	neg	neg	neg	unique	353	Zymo stool prep kit	2016-05-16	2016-06-09	MiSeq	2.247	975584511	5611090	2107245414	4.39994e+08	0.439994	8.05807e+08	0.805807	63.35	0.06
15_0004	1yr_random	Shared Health	neg	nd	neg	nd	neg	nd	neg	nd	neg	nd	neg	neg	concordant	na	neg	neg	neg	neg	neg	unique	353	Zymo stool prep kit	2016-05-16	2016-06-09	MiSeq	2.94	1265030687	7657250	2803259238	5.77039e+08	0.577039	2.27049e+09	2.27049	64.99	0.08
15_0006	1yr_random	Shared Health	neg	nd	neg	nd	neg	nd	neg	nd	neg	nd	neg	neg	concordant	na	neg	neg	neg	neg	neg	unique	353	Zymo stool prep kit	2016-05-16	2016-06-09	MiSeq	0.845	371128433	1964908	732410236	1.55284e+08	0.155284	5.60153e+07	0.0560153	10	0.33
15_0007	1yr_random	Shared Health	neg	nd	neg	nd	neg	nd	neg	nd	neg	nd	neg	neg	concordant	na	neg	neg	neg	neg	neg	unique	353	Zymo stool prep kit	2016-05-16	2016-06-09	MiSeq	3.612	1548327603	9397006	3432368308	7.03488e+08	0.703488	4.91986e+07	0.0491986	92.24	0.2
15_0008	1yr_random	Shared Health	neg	nd	neg	nd	neg	nd	neg	nd	neg	nd	neg	neg	concordant	na	neg	neg	neg	neg	neg	unique	353	Zymo stool prep kit	2016-05-16	2016-06-09	MiSeq	3.414	1470491419	10228	3456622					0.04	98.85
15_0009	1yr_random	Shared Health	neg	nd	neg	nd	neg	nd	neg	nd	neg	nd	neg	neg	concordant	na	neg	neg	neg	neg	neg	unique	353	Zymo stool prep kit	2016-05-16	2016-06-09	MiSeq	2.27	977556797	5923368	2132051528	4.4069e+08	0.44069	6.16306e+09	6.16306	33.43	0.39
15_0010	1yr_random	Shared Health	neg	nd	neg	nd	neg	nd	neg	nd	neg	nd	neg	neg	concordant	na	neg	neg	neg	neg	neg	unique	353	Zymo stool prep kit	2016-05-16	2016-06-09	MiSeq	1.92	826076212	5101144	1845551712	3.78576e+08	0.378576	1.18589e+09	1.18589	61.58	0.28
15_0011	1yr_random	Shared Health	neg	nd	neg	nd	neg	nd	neg	nd	neg	nd	neg	neg	concordant	na	neg	neg	neg	neg	neg	unique	353	Zymo stool prep kit	2016-05-16	2016-06-09	MiSeq	4.248	1819081951	10986568	4000186918	8.2096e+08	0.82096	1.41972e+08	0.141972	71.24	0.48
15_0012	1yr_random	Shared Health	neg	nd	neg	nd	neg	nd	neg	nd	neg	nd	neg	neg	concordant	na	neg	neg	neg	neg	neg	unique	353	Zymo stool prep kit	2016-05-16	2016-06-09	MiSeq	3.711	1598147594	9768490	3531668026	7.27816e+08	0.727816	1.24035e+08	0.124035	21	0.3
15_0013	1yr_random	Shared Health	neg	nd	neg	nd	neg	nd	neg	nd	neg	nd	neg	neg	concordant	na	neg	neg	neg	neg	neg	unique	353	Zymo stool prep kit	2016-05-16	2016-06-09	MiSeq	4.178	1792328587	14230	4706988					0.07	98.96
15_0014	1yr_random	Shared Health	neg	nd	neg	nd	neg	nd	neg	nd	neg	nd	neg	neg	concordant	na	neg	pos	neg	neg	Salmonella	unique	353	Zymo stool prep kit	2016-05-16	2016-06-09	MiSeq	4.127	1760963759	10904810	3920738276	8.00855e+08	0.800855	6.30396e+08	0.630396	86.79	0.06
15_0015	1yr_random	Shared Health	neg	nd	neg	nd	neg	nd	neg	nd	neg	nd	neg	neg	concordant	na	neg	neg	neg	neg	neg	unique	353	Zymo stool prep kit	2016-05-16	2016-06-09	MiSeq	5.38	2298487940	14190184	5108754094	1.04278e+09	1.04278	2.7471e+07	0.027471	99.29	0.01
15_0016	1yr_random	Shared Health	neg	nd	neg	nd	neg	nd	neg	nd	neg	nd	neg	neg	concordant	na	neg	neg	neg	neg	neg	unique	353	Zymo stool prep kit	2016-05-16	2016-06-09	MiSeq	4.436	1901516965	11531712	4188061152	8.59954e+08	0.859954	3.43714e+08	0.343714	83.65	0.03
15_0017	1yr_random	Shared Health	neg	nd	neg	nd	neg	nd	neg	nd	neg	nd	neg	neg	concordant	na	neg	neg	neg	neg	neg	unique	353	Zymo stool prep kit	2016-05-16	2016-06-09	MiSeq	4.887	2091701530	12706006	4624716972	9.47176e+08	0.947176	7.0467e+08	0.70467	32.67	0.24
15_0018	1yr_random	Shared Health	neg	nd	neg	nd	neg	nd	neg	nd	neg	nd	neg	neg	concordant	na	neg	neg	neg	neg	neg	unique	353	Zymo stool prep kit	2016-05-16	2016-06-09	MiSeq	2.145	928622665	4962216	1840015290	3.82768e+08	0.382768	2.82428e+09	2.82428	50.27	9.44
15_0019	1yr_random	Shared Health	neg	nd	neg	nd	neg	nd	neg	nd	neg	nd	neg	neg	concordant	na	neg	neg	neg	neg	neg	unique	353	Zymo stool prep kit	2016-05-16	2016-06-09	MiSeq	6.167	2616564476	16873446	5994328646	1.21102e+09	1.21102	2.38092e+08	0.238092	80.43	0.23
15_0020	1yr_random	Shared Health	neg	nd	neg	nd	neg	nd	neg	nd	neg	nd	neg	neg	concordant	na	neg	neg	neg	neg	neg	unique	353	Zymo stool prep kit	2016-05-16	2016-06-09	MiSeq	4.843	2074216024	12799666	4649338504	9.51706e+08	0.951706	7.56789e+07	0.0756789	95.68	0.03
15_0021	1yr_random	Shared Health	neg	nd	neg	nd	neg	nd	neg	nd	neg	nd	neg	neg	concordant	na	neg	neg	neg	neg	neg	unique	353	Zymo stool prep kit	2016-05-16	2016-06-09	MiSeq	3.156	1368819293	7240790	2708622816	5.68167e+08	0.568167	3.98974e+09	3.98974	34.69	7.96
15_0022	1yr_random	Shared Health	neg	nd	neg	nd	neg	nd	neg	nd	neg	nd	neg	neg	concordant	na	neg	neg	neg	neg	neg	unique	353	Zymo stool prep kit	2016-05-16	2016-06-09	MiSeq	5.502	2356258810	14340294	5240424910	1.07294e+09	1.07294	3.33875e+08	0.333875	81.49	1.21
15_0023	1yr_random	Shared Health	neg	nd	neg	nd	neg	nd	neg	nd	neg	nd	neg	neg	concordant	na	neg	neg	neg	neg	neg	unique	353	Zymo stool prep kit	2016-05-16	2016-06-09	MiSeq	2.076	899882563	5401880	1968258850	4.04501e+08	0.404501	1.01481e+09	1.01481	55.97	0.15
15_0024	1yr_random	Shared Health	neg	nd	neg	nd	neg	nd	neg	nd	neg	nd	neg	neg	concordant	na	neg	neg	neg	neg	neg	unique	353	Zymo stool prep kit	2016-05-16	2016-06-09	MiSeq	3.485	1480688995	6357334	2297207100	4.73189e+08	0.473189	7.22107e+08	0.722107	49.22	31.96
17_0025	culture positive	Shared Health	Campy	nd	nd	nd	nd	nd	nd	nd	nd	nd	nd	na	na	na	pos	neg	neg	neg	Campy	unique	688	Qiagen stool prep kit	2017-11-24	2017-11-28	MiSeq	7.389	3508748905	657180	247100892	4.50043e+07	0.0450043	7.57846e+08	0.757846	4.57	92.02
17_0026	culture positive	Shared Health	Salm	nd	nd	nd	nd	nd	nd	nd	nd	nd	nd	na	na	na	neg	pos	neg	neg	Salmonella	unique	688	Qiagen stool prep kit	2017-12-22	2018-01-05	MiSeq	8.954	4217556478	13994526	6948004346	1.39398e+09	1.39398	2.35231e+09	2.35231	53.87	0.44
17_0027	culture positive	Shared Health	STEC	nd	nd	nd	nd	nd	nd	nd	nd	nd	nd	na	na	na	neg	neg	neg	neg	neg	unique	688	Qiagen stool prep kit	2017-08-29	2017-09-11	MiSeq	4.955	2345743091	1748522	936249502	2.23454e+08	0.223454	1.22546e+09	1.22546	15.83	78.65
17_0028	culture positive	Shared Health	Campy	nd	nd	nd	nd	nd	nd	nd	nd	nd	nd	na	na	na	pos	neg	neg	neg	Campy	unique	688	Qiagen stool prep kit	2017-08-29	2017-09-11	MiSeq	5.307	2516064545	1079624	590492940	1.42795e+08	0.142795	1.30366e+09	1.30366	10.22	86.89
17_0029	culture positive	Shared Health	Salm	nd	nd	nd	nd	nd	nd	nd	nd	nd	nd	na	na	na	neg	pos	neg	neg	Salmonella	unique	688	Qiagen stool prep kit	2017-08-29	2017-09-11	MiSeq	3.597	1714855962	5404136	2914852486	7.2079e+08	0.72079	9.87289e+07	0.0987289	91.72	0.54
17_0030	culture positive	Shared Health	Salm	nd	nd	nd	nd	nd	nd	nd	nd	nd	nd	na	na	na	neg	pos	neg	neg	Salmonella	unique	688	Qiagen stool prep kit	2017-08-29	2017-09-11	MiSeq	4.541	2160941427	7304678	4006581238	9.49159e+08	0.949159	4.76561e+08	0.476561	67.77	0.1
17_0031	culture negative	Shared Health	neg	nd	nd	nd	nd	nd	nd	nd	nd	nd	nd	na	na	na	neg	neg	neg	neg	neg	unique	688	Qiagen stool prep kit	2017-08-29	2017-09-11	MiSeq	3.658	1746204607	5427442	2953108718	7.2214e+08	0.72214	1.08765e+09	1.08765	63.81	0.12
17_0032	culture positive	Shared Health	Salm	nd	nd	nd	nd	nd	nd	nd	nd	nd	nd	na	na	na	neg	pos	neg	neg	Salmonella	unique	688	Qiagen stool prep kit	2017-11-24	2017-11-28	MiSeq	8.128	3864413375	11690212	4540168228	1.06216e+09	1.06216	1.33775e+08	0.133775	96.47	0.01
15_0026	1yr_random	Shared Health	neg	nd	neg	nd	neg	nd	neg	nd	neg	nd	neg	neg	concordant	na	neg	neg	neg	neg	neg	unique	353	Zymo stool prep kit	2016-05-16	2016-06-09	MiSeq	6.988	2909658819	9242042	3180490402	6.36347e+08	0.636347	4.76591e+08	0.476591	33.8	53.21
17_0034	culture positive	Shared Health	Salm	nd	nd	nd	nd	nd	nd	nd	nd	nd	nd	na	na	na	neg	pos	neg	neg	Salmonella	unique	688	Qiagen stool prep kit	2017-11-24	2017-11-28	MiSeq	8.693	4140279860	11366028	4425891250	1.09491e+09	1.09491	2.35012e+08	0.235012	93.87	0.13
17_0035	culture positive	Shared Health	Salm	nd	nd	nd	nd	nd	nd	nd	nd	nd	nd	na	na	na	neg	pos	neg	neg	Salmonella	unique	688	Qiagen stool prep kit	2017-12-22	2018-01-05	MiSeq	9.053	4263616037	11806440	5834692566	1.42397e+09	1.42397	9.51735e+08	0.951735	67.55	14.21
17_0036	culture positive	Shared Health	Salm	nd	nd	nd	nd	nd	nd	nd	nd	nd	nd	na	na	na	neg	pos	neg	neg	Salmonella	unique	688	Qiagen stool prep kit	2017-12-22	2018-01-05	MiSeq	9.4	4445090525	14161360	7092869246	1.70051e+09	1.70051	5.44162e+09	5.44162	50.23	0.11
18_0001	culture positive	Shared Health	Salm	nd	nd	nd	nd	nd	nd	nd	nd	nd	nd	na	na	na	neg	pos	neg	neg	Salmonella	unique	688	Qiagen stool prep kit	2018-05-01	2018-05-15	MiSeq	17.006	8048804435	13713452	7578767408	1.60682e+09	1.60682	2.95975e+09	2.95975	27.72	49.73
18_0002	culture positive	Shared Health	Salm	nd	nd	nd	nd	nd	nd	nd	nd	nd	nd	na	na	na	neg	pos	neg	neg	Salmonella	unique	688	Qiagen stool prep kit	2018-08-28	2018-09-12	Miniseq	2.576	1096745688	6495178	2307339804	4.67104e+08	0.467104	6.47839e+08	0.647839	86.33	1.01
18_0003	culture positive	Shared Health	Salm	nd	nd	nd	nd	nd	nd	nd	nd	nd	nd	na	na	na	neg	pos	neg	neg	Salmonella	unique	688	Qiagen stool prep kit	2018-05-01	2018-05-15	MiSeq	14.526	6913460158	20634026	11600531394	2.36187e+09	2.36187	3.89425e+08	0.389425	62.32	1.64
15_0027	1yr_random	Shared Health	neg	nd	neg	nd	neg	nd	neg	nd	neg	nd	neg	neg	concordant	na	neg	neg	neg	neg	neg	unique	353	Zymo stool prep kit	2016-05-16	2016-06-09	MiSeq	8.175	3442533815	23041998	7975364558	1.59966e+09	1.59966	1.88421e+09	1.88421	34.54	0.08
18_0005	culture positive	Shared Health	Campy	nd	nd	nd	nd	nd	nd	nd	nd	nd	nd	na	na	na	pos	neg	neg	neg	Campy	unique	688	Qiagen stool prep kit	2018-08-09	2018-08-24	Miniseq	8.466	3603337958	481898	170454542	3.46244e+07	0.0346244	1.53831e+09	1.53831	1.86	96.01
18_0006	culture negative	Shared Health	neg	nd	nd	nd	nd	nd	nd	nd	nd	nd	nd	na	na	na	neg	neg	neg	neg	neg	unique	688	Qiagen stool prep kit	2018-08-28	2018-09-12	Miniseq	6.804	2902818833	17449596	6269800168	1.27325e+09	1.27325	1.30838e+09	1.30838	66.3	0.03
18_0007	culture negative	Shared Health	neg	nd	nd	nd	nd	nd	nd	nd	nd	nd	nd	na	na	na	neg	neg	neg	neg	neg	unique	688	Qiagen stool prep kit	2018-10-04	2018-10-12	Miniseq	6.098	2715813248	13810920	4543699988	9.56896e+08	0.956896	1.71587e+09	1.71587	50.52	0.04
18_0008	culture positive	Shared Health	Salm	nd	nd	nd	nd	nd	nd	nd	nd	nd	nd	na	na	na	neg	pos	neg	neg	Salmonella	unique	688	Qiagen power soil fecal kit	2018-10-23	2018-10-24	Miniseq	7.502	3339463058	20116254	6983026714	1.48362e+09	1.48362	4.31016e+08	0.431016	79.28	1.82
18_0009	culture positive	Shared Health	Salm	nd	nd	nd	nd	nd	nd	nd	nd	nd	nd	na	na	na	neg	pos	neg	neg	Salmonella	unique	688	Qiagen stool prep kit	2018-10-04	2018-10-12	Miniseq	15.022	6684017880	3045098	1001133556	2.11678e+08	0.211678	2.97497e+09	2.97497	5.16	88.93
15_0028	1yr_random	Shared Health	neg	nd	neg	nd	neg	nd	neg	nd	neg	nd	neg	neg	concordant	na	neg	neg	neg	neg	neg	unique	353	Zymo stool prep kit	2016-05-16	2016-06-09	MiSeq	5.088	2151291651	14207020	4923407030	9.9366e+08	0.99366	3.90517e+09	3.90517	48.63	0.31
15_0029	1yr_random	Shared Health	neg	nd	neg	nd	neg	nd	neg	nd	neg	nd	neg	neg	concordant	na	neg	neg	neg	neg	neg	unique	353	Zymo stool prep kit	2016-05-16	2016-06-09	MiSeq	6.028	2560894284	16397726	5745575876	1.16768e+09	1.16768	2.07375e+08	0.207375	79.21	0.35
15_0030	1yr_random	Shared Health	neg	nd	neg	nd	neg	nd	neg	nd	neg	nd	neg	neg	concordant	na	neg	neg	neg	neg	neg	unique	353	Zymo stool prep kit	2016-05-16	2016-06-09	MiSeq	2.368	1029847098	5998178	2240211664	4.64967e+08	0.464967	2.09634e+10	20.9634	28.83	0.1
15_0031	1yr_random	Shared Health	neg	nd	neg	nd	neg	nd	neg	nd	neg	nd	neg	neg	concordant	na	neg	neg	neg	neg	neg	unique	353	Zymo stool prep kit	2016-05-16	2016-06-09	MiSeq	6.303	2666020430	17583680	6219253880	1.25409e+09	1.25409	1.84769e+08	0.184769	25.93	0.64
15_0032	1yr_random	Shared Health	neg	nd	neg	nd	neg	nd	neg	nd	neg	nd	neg	neg	concordant	na	neg	neg	neg	neg	neg	unique	353	Zymo stool prep kit	2016-05-16	2016-06-09	MiSeq	3.968	1709524249	10079612	3694087238	7.64453e+08	0.764453	4.65389e+07	0.0465389	98.93	0.08
15_0033	1yr_random	Shared Health	neg	nd	neg	nd	neg	nd	neg	nd	neg	nd	neg	neg	concordant	na	neg	neg	neg	neg	neg	unique	353	Zymo stool prep kit	2016-05-16	2016-06-09	MiSeq	2.402	1036351946	6290302	2271535530	4.68955e+08	0.468955	6.7406e+09	6.7406	21.73	1.15
15_0034	1yr_random	Shared Health	neg	nd	neg	nd	neg	nd	neg	nd	neg	nd	neg	neg	concordant	na	neg	neg	neg	neg	neg	unique	353	Zymo stool prep kit	2016-05-16	2016-06-09	MiSeq	4.562	1936168038	12566316	4472271648	9.06352e+08	0.906352	5.38519e+09	5.38519	31.09	0.15
15_0035	1yr_random	Shared Health	neg	nd	neg	nd	neg	nd	neg	nd	neg	nd	neg	neg	concordant	na	neg	neg	neg	neg	neg	unique	353	Zymo stool prep kit	2016-05-16	2016-06-09	MiSeq	3.648	1570493307	6545626	2413741318	4.98659e+08	0.498659	5.92013e+07	0.0592013	67.81	29.44
15_0036	1yr_random	Shared Health	neg	nd	neg	nd	neg	nd	neg	nd	neg	nd	neg	neg	concordant	na	neg	neg	neg	neg	neg	unique	353	Zymo stool prep kit	2016-05-16	2016-06-09	MiSeq	2.666	1144031323	7022204	2534902570	5.22635e+08	0.522635	2.90088e+08	0.290088	78.14	0.18
15_0037	1yr_random	Shared Health	neg	nd	neg	nd	neg	nd	neg	nd	neg	nd	neg	neg	concordant	na	neg	neg	neg	neg	neg	unique	353	Zymo stool prep kit	2016-05-16	2016-06-09	MiSeq	3.107	1323736359	26242	8317200	1.66377e+06	0.00166377	7.19501e+09	7.19501	0.07	98.12
15_0038	1yr_random	Shared Health	neg	nd	neg	nd	neg	nd	neg	nd	neg	nd	neg	neg	concordant	na	neg	neg	neg	neg	neg	unique	353	Zymo stool prep kit	2016-05-16	2016-06-09	MiSeq	1.99	861653502	4865296	1792834100	3.73596e+08	0.373596	2.28227e+08	0.228227	70.24	3.7
15_0040	1yr_random	Shared Health	neg	nd	neg	nd	neg	nd	neg	nd	neg	nd	neg	neg	concordant	na	neg	neg	neg	neg	neg	unique	353	Zymo stool prep kit	2016-05-16	2016-06-09	MiSeq	2.383	1036020861	4769388	1818934720	3.84477e+08	0.384477	6.73413e+08	0.673413	58.61	19.78
15_0041	1yr_random	Shared Health	neg	nd	neg	nd	neg	nd	neg	nd	neg	nd	neg	neg	concordant	na	neg	neg	neg	neg	neg	unique	353	Zymo stool prep kit	2016-05-16	2016-06-09	MiSeq	2.452	1070387053	5980422	2245180244	4.73159e+08	0.473159	1.3752e+09	1.3752	66.49	0.06
15_0042	1yr_random	Shared Health	neg	nd	neg	nd	neg	nd	neg	nd	neg	nd	neg	neg	concordant	na	neg	neg	neg	neg	neg	unique	353	Zymo stool prep kit	2016-05-16	2016-06-09	MiSeq	3.929	1685766792	9874470	3616664190	7.43024e+08	0.743024	1.43967e+09	1.43967	65.2	3.32
15_0043	1yr_random	Shared Health	neg	nd	neg	nd	neg	nd	neg	nd	neg	nd	neg	neg	concordant	na	neg	neg	neg	neg	neg	unique	353	Zymo stool prep kit	2016-05-16	2016-06-09	MiSeq	5.114	2169219431	13774962	4657441566	9.44157e+08	0.944157	3.18434e+09	3.18434	48.54	1.01
15_0044	1yr_random	Shared Health	neg	nd	neg	nd	neg	nd	neg	nd	neg	nd	neg	neg	concordant	na	neg	neg	neg	neg	neg	unique	353	Zymo stool prep kit	2016-05-16	2016-06-09	MiSeq	2.269	975580379	3729114	1387209658	2.90463e+08	0.290463	2.0146e+09	2.0146	40.18	36.57
15_0045	1yr_random	Shared Health	neg	nd	neg	nd	neg	nd	neg	nd	neg	nd	neg	neg	concordant	na	neg	pos	neg	neg	Salmonella	unique	353	Zymo stool prep kit	2016-05-16	2016-06-09	MiSeq	4.365	1869160911	10201318	3724485310	7.6366e+08	0.76366	7.39265e+07	0.0739265	87.85	10.37
15_0046	1yr_random	Shared Health	neg	nd	neg	nd	neg	nd	neg	nd	neg	nd	neg	neg	concordant	na	neg	neg	neg	neg	neg	unique	353	Zymo stool prep kit	2016-05-16	2016-06-09	MiSeq	2.496	1072887100	6040276	2189768246	4.51716e+08	0.451716	1.01466e+10	10.1466	42.61	8.11
15_0048	1yr_random	Shared Health	neg	nd	neg	nd	neg	nd	neg	nd	neg	nd	neg	neg	concordant	na	neg	neg	neg	neg	neg	unique	353	Zymo stool prep kit	2016-05-16	2016-06-09	MiSeq	5.03	2149700827	13318154	4834127068	9.85803e+08	0.985803	1.05917e+09	1.05917	54.29	0.07
15_0049	1yr_random	Shared Health	neg	nd	neg	nd	neg	nd	neg	nd	neg	nd	neg	neg	concordant	na	neg	neg	neg	neg	neg	unique	353	Zymo stool prep kit	2016-05-16	2016-06-09	MiSeq	2.607	1121647642	6861616	2509303148	5.17229e+08	0.517229	6.32045e+08	0.632045	13.14	0.16
15_0050	1yr_random	Shared Health	neg	nd	neg	nd	neg	nd	neg	nd	neg	nd	neg	neg	concordant	na	neg	neg	neg	neg	neg	unique	353	Zymo stool prep kit	2016-05-16	2016-06-09	MiSeq	3.516	1484181463	9712424	3340457466	6.7345e+08	0.67345	8.52788e+08	0.852788	72.08	2.09
15_0052	1yr_random	Shared Health	neg	nd	neg	nd	neg	nd	neg	nd	neg	nd	neg	neg	concordant	na	neg	neg	neg	neg	neg	unique	353	Zymo stool prep kit	2016-05-16	2016-06-09	MiSeq	4.178	1784481349	11081380	4018767012	8.19474e+08	0.819474	3.24675e+08	0.324675	67.75	0.11
15_0053	1yr_random	Shared Health	neg	nd	neg	nd	neg	nd	neg	nd	neg	nd	neg	neg	concordant	na	neg	neg	neg	neg	neg	unique	353	Zymo stool prep kit	2016-05-16	2016-06-09	MiSeq	5.827	2484719390	15550788	5586295178	1.13113e+09	1.13113	1.22358e+09	1.22358	50.76	0.82
15_0055	1yr_random	Shared Health	neg	nd	neg	nd	neg	nd	neg	nd	neg	nd	neg	neg	concordant	na	neg	neg	neg	neg	neg	unique	353	Zymo stool prep kit	2016-05-16	2016-06-09	MiSeq	3.637	1555172167	9613156	3463371926	7.07783e+08	0.707783	1.42032e+09	1.42032	68.72	0.05
15_0056	1yr_random	Shared Health	neg	nd	neg	nd	neg	nd	neg	nd	neg	nd	neg	neg	concordant	na	neg	neg	neg	neg	neg	unique	353	Zymo stool prep kit	2016-05-16	2016-06-09	MiSeq	3.334	1430586092	8669470	3144996160	6.43769e+08	0.643769	3.24734e+08	0.324734	71.28	0.58
15_0057	1yr_random	Shared Health	neg	nd	neg	nd	neg	nd	neg	nd	neg	nd	neg	neg	concordant	na	neg	neg	neg	neg	neg	unique	353	Zymo stool prep kit	2016-05-16	2016-06-09	MiSeq	4.769	2035732170	12561220	4554248346	9.2926e+08	0.92926	5.19789e+08	0.519789	71.42	0.71
15_0058	1yr_random	Shared Health	neg	nd	neg	nd	neg	nd	neg	nd	neg	nd	neg	neg	concordant	na	neg	neg	neg	neg	neg	unique	353	Zymo stool prep kit	2016-05-16	2016-06-09	MiSeq	5.289	2237975240	11745626	4161935854	8.43753e+08	0.843753	7.62067e+07	0.0762067	75.27	18.56
15_0059	1yr_random	Shared Health	neg	nd	neg	nd	neg	nd	neg	nd	neg	nd	neg	neg	concordant	na	neg	neg	neg	neg	neg	unique	353	Zymo stool prep kit	2016-05-16	2016-06-09	MiSeq	5.566	2364213842	15130632	5394481938	1.09203e+09	1.09203	3.73235e+07	0.0373235	98.86	0.03
15_0060	1yr_random	Shared Health	neg	nd	neg	nd	neg	nd	neg	nd	neg	nd	neg	neg	concordant	na	neg	neg	neg	neg	neg	unique	353	Zymo stool prep kit	2016-05-16	2016-06-09	MiSeq	5.485	2329634935	14191162	5054276856	1.02465e+09	1.02465	7.46281e+08	0.746281	72.79	4.2
15_0061	1yr_random	Shared Health	neg	nd	neg	nd	neg	nd	neg	nd	neg	nd	neg	neg	concordant	na	neg	neg	neg	neg	neg	unique	353	Zymo stool prep kit	2016-05-16	2016-06-09	MiSeq	5.542	2363607010	14822256	5350453194	1.0888e+09	1.0888	2.86503e+09	2.86503	32.15	0.07
15_0062	1yr_random	Shared Health	neg	nd	neg	nd	neg	nd	neg	nd	neg	nd	neg	neg	concordant	na	neg	neg	neg	neg	neg	unique	353	Zymo stool prep kit	2016-05-16	2016-06-09	MiSeq	2.992	1274332681	8129718	2854695430	5.82429e+08	0.582429	6.55513e+08	0.655513	77.26	0.31
15_0063	1yr_random	Shared Health	neg	nd	neg	nd	neg	nd	neg	nd	neg	nd	neg	neg	concordant	na	neg	neg	neg	neg	neg	unique	353	Zymo stool prep kit	2016-05-16	2016-06-09	MiSeq	2.039	881520314	5350164	1912253020	3.93997e+08	0.393997	2.08598e+09	2.08598	67.48	0.19
15_0064	1yr_random	Shared Health	neg	nd	neg	nd	neg	nd	neg	nd	neg	nd	neg	neg	concordant	na	neg	neg	neg	neg	neg	unique	353	Zymo stool prep kit	2016-05-16	2016-06-09	MiSeq	5.154	2197402373	13723886	4961850346	1.00917e+09	1.00917	9.54093e+08	0.954093	62.05	0.12
15_0065	1yr_random	Shared Health	neg	nd	neg	nd	neg	nd	neg	nd	neg	nd	neg	neg	concordant	na	neg	neg	neg	neg	neg	unique	353	Zymo stool prep kit	2016-05-16	2016-06-09	MiSeq	2.288	997296233	5632104	2118411662	4.44559e+08	0.444559	1.41417e+10	14.1417	46.1	0.09
15_0066	1yr_random	Shared Health	neg	nd	neg	nd	neg	nd	neg	nd	neg	nd	neg	neg	concordant	na	neg	neg	neg	neg	neg	unique	353	Zymo stool prep kit	2016-05-16	2016-06-09	MiSeq	6.163	2556280680	17321874	5682062018	1.12436e+09	1.12436	7.70404e+08	0.770404	52.13	6.27
15_0067	1yr_random	Shared Health	neg	nd	neg	nd	neg	nd	neg	nd	neg	nd	neg	neg	concordant	na	neg	neg	neg	neg	neg	unique	353	Zymo stool prep kit	2016-05-16	2016-06-09	MiSeq	5.511	2341715294	14711788	5257088732	1.0646e+09	1.0646	8.53474e+08	0.853474	70.51	1.26
15_0068	1yr_random	Shared Health	neg	nd	neg	nd	neg	nd	neg	nd	neg	nd	neg	neg	concordant	na	neg	neg	neg	neg	neg	unique	353	Zymo stool prep kit	2016-05-16	2016-06-09	MiSeq	4.59	1973518486	11766936	4322541512	8.90622e+08	0.890622	8.49881e+09	8.49881	62.04	0.08
15_0069	1yr_random	Shared Health	neg	nd	neg	nd	neg	nd	neg	nd	neg	nd	neg	neg	concordant	na	neg	neg	neg	neg	neg	unique	353	Zymo stool prep kit	2016-05-16	2016-06-09	MiSeq	3.609	1548745347	9290188	3392036202	6.97085e+08	0.697085	9.69975e+07	0.0969975	96.45	0.04
15_0070	1yr_random	Shared Health	neg	nd	neg	nd	neg	nd	neg	nd	neg	nd	neg	neg	concordant	na	neg	neg	neg	neg	neg	unique	353	Zymo stool prep kit	2016-05-16	2016-06-09	MiSeq	7.117	3008981715	19377062	6795456422	1.36722e+09	1.36722	6.18417e+08	0.618417	49.81	0.47
15_0071	1yr_random	Shared Health	neg	nd	neg	nd	neg	nd	neg	nd	neg	nd	neg	neg	concordant	na	neg	neg	neg	neg	neg	unique	353	Zymo stool prep kit	2016-05-16	2016-06-09	MiSeq	5.746	2454865810	15240854	5522093272	1.12503e+09	1.12503	4.39787e+08	0.439787	72.81	0.03
15_0072	1yr_random	Shared Health	neg	nd	neg	nd	neg	nd	neg	nd	neg	nd	neg	neg	concordant	na	neg	neg	neg	neg	neg	unique	353	Zymo stool prep kit	2016-05-16	2016-06-09	MiSeq	3.696	1584559479	9608622	3510571732	7.19566e+08	0.719566	3.02873e+08	0.302873	92.34	0.12
15_0073	1yr_random	Shared Health	neg	nd	neg	nd	neg	nd	neg	nd	neg	nd	neg	neg	concordant	na	neg	neg	neg	neg	neg	unique	353	Zymo stool prep kit	2016-05-16	2016-06-09	MiSeq	4.223	1810108909	20288	6896588	1.40485e+06	0.00140485	3.67752e+09	3.67752	0.09	98.68
15_0074	1yr_random	Shared Health	neg	nd	neg	nd	neg	nd	neg	nd	neg	nd	neg	neg	concordant	na	neg	neg	neg	neg	neg	unique	353	Zymo stool prep kit	2016-05-16	2016-06-09	MiSeq	4.798	2053791292	12540856	4559564064	9.3383e+08	0.93383	2.74589e+09	2.74589	41.23	0.14
15_0075	1yr_random	Shared Health	neg	nd	neg	nd	neg	nd	neg	nd	neg	nd	neg	neg	concordant	na	neg	neg	neg	neg	neg	unique	353	Zymo stool prep kit	2016-05-16	2016-06-09	MiSeq	5.238	2229541812	13925212	4955854570	1.00871e+09	1.00871	1.40117e+08	0.140117	82.17	1.43
15_0076	1yr_random	Shared Health	neg	nd	neg	nd	neg	nd	neg	nd	neg	nd	neg	neg	concordant	na	neg	neg	neg	neg	neg	unique	353	Zymo stool prep kit	2016-05-16	2016-06-09	MiSeq	4.274	1831594765	11128400	4056884226	832515604	0.832516	1.23701e+09	1.23701	69.03	0.04
15_0077	1yr_random	Shared Health	neg	nd	neg	nd	neg	nd	neg	nd	neg	nd	neg	neg	concordant	na	neg	neg	neg	neg	neg	unique	353	Zymo stool prep kit	2016-05-16	2016-06-09	MiSeq	4.565	1954242219	11983110	4335464106	8.82388e+08	0.882388	1.66809e+09	1.66809	30.55	0.15
15_0078	1yr_random	Shared Health	neg	nd	neg	nd	neg	nd	neg	nd	neg	nd	neg	neg	concordant	na	neg	neg	neg	neg	neg	unique	353	Zymo stool prep kit	2016-05-16	2016-06-09	MiSeq	3.011	1294193447	7810874	2880531156	5.91814e+08	0.591814	2.32442e+08	0.232442	67.33	0.71
15_0079	1yr_random	Shared Health	neg	nd	neg	nd	neg	nd	neg	nd	neg	nd	neg	neg	concordant	na	neg	neg	neg	neg	neg	unique	353	Zymo stool prep kit	2016-05-16	2016-06-09	MiSeq	4.56	1963955476	12384	3737716					0.04	98.52
15_0080	1yr_random	Shared Health	neg	nd	neg	nd	neg	nd	neg	nd	neg	nd	neg	neg	concordant	na	neg	neg	neg	neg	neg	unique	353	Zymo stool prep kit	2016-05-16	2016-06-09	MiSeq	5.497	2355678013	13974110	4938436398	1.00773e+09	1.00773	2.21775e+08	0.221775	48.75	1.05
15_0081	1yr_random	Shared Health	neg	nd	neg	nd	neg	nd	neg	nd	neg	nd	neg	neg	concordant	na	neg	neg	neg	neg	neg	unique	353	Zymo stool prep kit	2016-05-16	2016-06-09	MiSeq	4.128	1765265268	10818708	3942524752	8.06026e+08	0.806026	9.90606e+08	0.990606	81.3	0.56
15_0082	1yr_random	Shared Health	neg	nd	neg	nd	neg	nd	neg	nd	neg	nd	neg	neg	concordant	na	neg	neg	neg	neg	neg	unique	353	Zymo stool prep kit	2016-05-16	2016-06-09	MiSeq	6.296	2671988334	16997376	6047354074	1.22367e+09	1.22367	2.32127e+09	2.32127	49.76	0.36
15_0083	1yr_random	Shared Health	neg	nd	neg	nd	neg	nd	neg	nd	neg	nd	neg	neg	concordant	na	neg	neg	neg	neg	neg	unique	353	Zymo stool prep kit	2016-05-16	2016-06-09	MiSeq	7.219	3066141634	19475824	6971676154	1.41208e+09	1.41208	2.18458e+09	2.18458	23.69	0.51
15_0084	1yr_random	Shared Health	neg	nd	neg	nd	neg	nd	neg	nd	neg	nd	neg	neg	concordant	na	neg	neg	neg	neg	neg	unique	353	Zymo stool prep kit	2016-05-16	2016-06-09	MiSeq	2.9	1256193614	6986858	2530883384	5.26973e+08	0.526973	2.84966e+09	2.84966	22.53	0.86
15_0085	1yr_random	Shared Health	neg	nd	neg	nd	neg	nd	neg	nd	neg	nd	neg	neg	concordant	na	neg	neg	neg	neg	neg	unique	353	Zymo stool prep kit	2016-05-16	2016-06-09	MiSeq	4.658	1989496285	10858816	3921051974	8.05083e+08	0.805083	1.45418e+09	1.45418	51.27	12.8
15_0086	1yr_random	Shared Health	neg	nd	neg	nd	neg	nd	neg	nd	neg	nd	neg	neg	concordant	na	neg	neg	neg	neg	neg	unique	353	Zymo stool prep kit	2016-05-16	2016-06-09	MiSeq	5.655	2418072600	17510	5446026					0.03	98.77
15_0087	1yr_random	Shared Health	neg	nd	neg	nd	neg	nd	neg	nd	neg	nd	neg	neg	concordant	na	neg	neg	neg	neg	neg	unique	353	Zymo stool prep kit	2016-05-16	2016-06-09	MiSeq	4.608	1975501321	11819560	4273641918	8.7918e+08	0.87918	5.74249e+07	0.0574249	93.04	0.26
15_0088	1yr_random	Shared Health	neg	nd	neg	nd	neg	nd	neg	nd	neg	nd	neg	neg	concordant	na	neg	neg	neg	neg	neg	unique	353	Zymo stool prep kit	2016-05-16	2016-06-09	MiSeq	3.029	1311344141	7758200	2851230224	5.91377e+08	0.591377	1.06292e+09	1.06292	78.04	0.17
19_0076	culture negative	CPL	neg	neg	nd	neg	nd	neg	nd	neg	nd	neg	nd	neg	concordant	na	neg	neg	neg	neg	neg	I	1275	Qiagen stool prep kit	2019-10-15	2019-10-30	NextSeq	5.453	2294921420	14064310	4857400892	9.70733e+08	0.970733	1.90871e+09	1.90871	45.82	0.19
19_0116	culture negative	CPL	neg	neg	nd	neg	nd	neg	nd	neg	nd	neg	nd	neg	concordant	na	neg	neg	neg	neg	neg	unique	1275	Qiagen stool prep kit	2020-01-17	2020-01-24	NextSeq	2.233	945995000	5823000	2070235064	419675256	0.419675	3.11915e+08	0.311915	54.01	0.08
19_0117	culture negative	CPL	neg	neg	neg	neg	neg	neg	neg	neg	neg	neg	neg	neg	concordant	concordant	neg	neg	neg	pos	stx	unique	1275	Qiagen stool prep kit	2020-01-17	2020-01-24	NextSeq	2.243	947025655	5824382	2052379932	4.14405e+08	0.414405	2.25561e+09	2.25561	49.44	2.22
19_0124	culture negative	CPL	neg	neg	nd	neg	nd	neg	nd	neg	nd	neg	nd	neg	concordant	na	neg	neg	neg	neg	neg	unique	1275	Qiagen stool prep kit	2020-01-17	2020-01-24	NextSeq	0.96	414075953	2492154	876875962	1.81334e+08	0.181334	2.69065e+08	0.269065	89.86	0.02
19_0128	culture negative	CPL	neg	neg	nd	neg	nd	neg	nd	neg	nd	neg	nd	neg	concordant	na	neg	neg	neg	neg	neg	unique	1275	Qiagen stool prep kit	2020-01-20	2020-01-24	NextSeq	1.544	654334866	3959846	1407344382	2.86253e+08	0.286253	1.71627e+08	0.171627	74.39	0.79
19_0133	culture negative	CPL	neg	neg	nd	neg	nd	neg	nd	neg	nd	neg	nd	neg	concordant	na	neg	neg	neg	neg	neg	unique	1275	Qiagen stool prep kit	2020-01-20	2020-01-24	NextSeq	2.062	868306488	5425370	1900433916	3.83354e+08	0.383354	2.47238e+08	0.247238	85.21	0.89
19_0134	culture negative	CPL	neg	neg	nd	neg	nd	neg	nd	neg	nd	neg	nd	neg	concordant	na	neg	neg	neg	neg	neg	unique	1275	Qiagen stool prep kit	2020-01-20	2020-01-24	NextSeq	1.3	550850944	3344796	1186418308	2.41187e+08	0.241187	1.04074e+09	1.04074	41.46	0.14
14_0007	culture positive	Shared Health	Campy	nd	neg	nd	neg	nd	neg	nd	neg	nd	neg	neg	discordant	na	neg	neg	neg	neg	neg	unique	118	Qiagen stool prep kit	2015-01-12	2015-01-30	MiSeq	25.649	11982786459	50122626	26887049726	5.95845e+09	5.95845	1.48515e+09	1.48515	40.84	0.11
15_0005	1yr_random	Shared Health	Salm	nd	neg	nd	neg	nd	neg	nd	neg	nd	neg	neg	discordant	na	neg	neg	neg	neg	neg	unique	353	combination	2017-01-25	2017-01-26	MiSeq	11.11	5099140451	3997400	1858419370	4.01081e+08	0.401081	9.62147e+08	0.962147	40.07	0.08
17_0020	EBP-culture discordant	CPL	Salm	neg	neg	neg	neg	neg	neg	neg	neg	neg	neg	neg	discordant	concordant	neg	neg	neg	neg	neg	unique	707	Qiagen stool prep kit	2017-10-11	2017-10-16	MiSeq	18.259	7770652020	17846224	6203317314	1.28472e+09	1.28472	2.42276e+09	2.42276	70.72	0.79
17_0033	culture positive	Shared Health	Salm	nd	Salm	nd	neg	nd	pos	nd	neg	nd	neg	Salmonella	concordant	na	neg	neg	neg	neg	neg	unique	688	Qiagen stool prep kit	2017-11-24	2017-11-28	MiSeq	8.11	3847058475	12247908	4873331662	1.13961e+09	1.13961	4.74228e+08	0.474228	51.14	0.1
19_0002	culture positive	CPL	Salm	spa	nd	neg	nd	pos	nd	neg	nd	neg	nd	Salmonella	concordant	na	neg	pos	neg	neg	Salmonella	unique	1275	Qiagen stool prep kit	2019-06-20	2019-06-25	MiSeq	3.206	1519251817	4468956	2302060320	5.51583e+08	0.551583	6.52943e+07	0.0652943	88.36	6.85
19_0019	culture positive	CPL	Salm	spa	nd	neg	nd	pos	nd	neg	nd	neg	nd	Salmonella	concordant	na	neg	pos	neg	neg	Salmonella	unique	1275	Qiagen stool prep kit	2019-08-08	2019-08-21	NextSeq	3.557	1488211754	8641952	2930378436	5.82524e+08	0.582524	1.42789e+09	1.42789	60.43	0.43
19_0023	culture positive	CPL	Salm	spa	nd	neg	nd	pos	nd	neg	nd	neg	nd	Salmonella	concordant	na	neg	pos	neg	neg	Salmonella	unique	1275	Qiagen stool prep kit	2019-08-08	2019-08-21	NextSeq	5.467	2305931860	146220	50340890	1.00636e+07	0.0100636	4.91552e+08	0.491552	1.06	97.12
19_0029	culture positive	CPL	Salm	spa	nd	neg	nd	pos	nd	neg	nd	neg	nd	Salmonella	concordant	na	neg	pos	neg	neg	Salmonella	unique	1275	Qiagen stool prep kit	2019-10-15	2019-10-30	NextSeq	3.8	1588517995	9991684	3380236774	6.71161e+08	0.671161	7.97171e+08	0.797171	73.79	0.31
19_0032	culture positive	CPL	Salm	spa	nd	neg	nd	pos	nd	neg	nd	neg	nd	Salmonella	concordant	na	neg	pos	neg	neg	Salmonella	unique	1275	Qiagen stool prep kit	2019-10-15	2019-10-30	NextSeq	7.472	3196551919	18198732	6329752676	1.29701e+09	1.29701	3.98302e+08	0.398302	84.24	1.83
19_0033	culture positive	CPL	Salm	spa	nd	neg	nd	pos	nd	neg	nd	neg	nd	Salmonella	concordant	na	neg	pos	neg	neg	Salmonella	unique	1275	Qiagen stool prep kit	2019-10-15	2019-10-30	NextSeq	11.514	4919720826	28926758	10047434120	2.04626e+09	2.04626	2.70632e+08	0.270632	63.06	2.62
19_0056	culture positive	CPL	Salm	spa	nd	neg	nd	pos	nd	neg	nd	neg	nd	Salmonella	concordant	na	neg	neg	neg	neg	neg	unique	1275	Qiagen stool prep kit	2019-10-15	2019-10-30	NextSeq	22.096	9351844278	29280818	10076951568	2.05512e+09	2.05512	2.10804e+09	2.10804	51.26	0.37
19_0061	culture positive	CPL	Salm	spa	nd	neg	nd	pos	nd	neg	nd	neg	nd	Salmonella	concordant	na	neg	pos	neg	neg	Salmonella	H	1275	Qiagen stool prep kit	2019-10-15	2019-10-30	NextSeq	1.081	495969793	1064858	395273098	9.91537e+07	0.0991537	3.27608e+09	3.27608	53.95	0.77
19_0062	culture positive	CPL	Salm	spa	nd	neg	nd	pos	nd	neg	nd	neg	nd	Salmonella	concordant	na	neg	pos	neg	neg	Salmonella	unique	1275	Qiagen stool prep kit	2019-10-15	2019-10-30	NextSeq	2.145	909772277	5233862	1836670478	3.71968e+08	0.371968	1.22135e+09	1.22135	38.13	0.13
19_0065	culture positive	CPL	Salm	spa	nd	neg	nd	pos	nd	neg	nd	neg	nd	Salmonella	concordant	na	neg	pos	neg	neg	Salmonella	unique	1275	Qiagen stool prep kit	2019-10-15	2019-10-30	NextSeq	2.629	1114425859	6496414	2276552152	4.59608e+08	0.459608	1.08433e+08	0.108433	80.95	0.1
19_0066	culture positive	CPL	Salm	spa	nd	neg	nd	pos	nd	neg	nd	neg	nd	Salmonella	concordant	na	neg	pos	neg	neg	Salmonella	H	1275	Qiagen stool prep kit	2019-10-15	2019-10-30	NextSeq	3.376	1424910740	8059436	2799882302	5.61706e+08	0.561706	1.61325e+09	1.61325	50.86	6.04
19_0096	culture positive	CPL	Salm	spa	nd	neg	nd	pos	nd	neg	nd	neg	nd	Salmonella	concordant	na	neg	pos	neg	neg	Salmonella	unique	1275	Qiagen stool prep kit	2020-01-15	2020-01-24	NextSeq	1.371	581605635	3538430	1263996716	2.57009e+08	0.257009	1.13734e+09	1.13734	68.67	0.11
19_0108	culture positive	CPL	Salm	spa	nd	neg	nd	pos	nd	neg	nd	neg	nd	Salmonella	concordant	na	neg	neg	neg	neg	neg	unique	1275	Qiagen stool prep kit	2020-01-16	2020-01-24	NextSeq	5.614	2408005674	14563058	4940535238	1.01073e+09	1.01073	3.90836e+09	3.90836	52.06	0.19
19_0136	culture positive	CPL	Salm	spa	nd	neg	nd	pos	nd	neg	nd	neg	nd	Salmonella	concordant	na	neg	pos	neg	neg	Salmonella	unique	1275	Qiagen stool prep kit	2020-01-20	2020-01-24	NextSeq	1.583	670957757	3805510	1354851822	2.75502e+08	0.275502	1.65842e+08	0.165842	81.57	6.68
19_0139	culture positive	CPL	Salm	spa	nd	neg	nd	pos	nd	neg	nd	neg	nd	Salmonella	concordant	na	neg	pos	neg	neg	Salmonella	unique	1275	Qiagen stool prep kit	2020-01-20	2020-01-24	NextSeq	10.017	4281056436	25016132	8745537086	1.78295e+09	1.78295	1.79603e+09	1.79603	45.41	1.63
19_0149	culture positive	CPL	Salm	spa	nd	neg	nd	pos	nd	neg	nd	neg	nd	Salmonella	concordant	na	neg	pos	neg	neg	Salmonella	unique	1275	Qiagen stool prep kit	2020-01-21	2020-01-24	NextSeq	1.533	673256977	3293386	1105967394	2.40206e+08	0.240206	3.75693e+08	0.375693	95.91	0.39
17_0021	EBP-culture discordant	CPL	neg	spa	Salm	neg	neg	pos	pos	neg	neg	neg	neg	Salmonella	discordant	concordant	neg	neg	neg	neg	neg	unique	707	Qiagen stool prep kit	2017-10-11	2017-10-16	MiSeq	1.528	722708908	2277622	1042178868	2.51478e+08	0.251478	1.32901e+09	1.32901	58.14	0.13
17_0010	EBP-culture discordant	CPL	neg	spa, stx	Salm, stx	neg	neg	pos	pos	neg	neg	pos	pos	Salmonella, stx	discordant	concordant	neg	neg	neg	neg	neg	B	707	Qiagen stool prep kit	2017-10-11	2017-10-16	MiSeq	0.916	431552513	793920	336282606	7.71178e+07	0.0771178	1.07125e+09	1.07125	37.69	43.82
19_0004	culture positive	CPL	Shig	ipa	nd	neg	nd	neg	nd	pos	nd	neg	nd	Shigella	concordant	na	neg	neg	neg	neg	neg	unique	1275	Qiagen stool prep kit	2019-06-20	2019-06-25	MiSeq	17.668	7614354809	17488566	6632679932	1.42213e+09	1.42213	9.57986e+08	0.957986	59.83	4.3
19_0005	culture positive	CPL	Shig	ipa	nd	neg	nd	neg	nd	pos	nd	neg	nd	Shigella	concordant	na	neg	neg	pos	neg	Shigella	unique	1275	Qiagen stool prep kit	2019-06-20	2019-06-25	MiSeq	0.818	388467471	1082522	479614142	1.1917e+08	0.11917	2.4408e+09	2.4408	70.45	0.28
19_0018	culture positive	CPL	Shig	ipa	nd	neg	nd	neg	nd	pos	nd	neg	nd	Shigella	concordant	na	neg	neg	pos	neg	Shigella	unique	1275	Qiagen stool prep kit	2019-08-08	2019-08-21	NextSeq	8.728	3677283628	21018704	7264939020	1.45382e+09	1.45382	4.86653e+08	0.486653	54.11	0.13
19_0068	culture positive	CPL	Shig	ipa	nd	neg	nd	neg	nd	pos	nd	neg	nd	Shigella	concordant	na	neg	neg	pos	neg	Shigella	unique	1275	Qiagen stool prep kit	2019-10-15	2019-10-30	NextSeq	2.227	942434215	261394	91298080	1.83853e+07	0.0183853	2.05235e+08	0.205235	4.65	93.24
15_0047	1yr_random	Shared Health	neg	nd	Shig	nd	neg	nd	neg	nd	pos	nd	neg	Shigella	discordant	na	neg	neg	pos	neg	Shigella	unique	353	Zymo stool prep kit	2016-05-16	2016-06-09	MiSeq	3.585	1531702020	9436636	3414860684	6.97198e+08	0.697198	5.1423e+08	0.51423	78.74	0.73
17_0017	EBP-culture discordant	CPL	neg	ipa	Shig	neg	neg	neg	neg	pos	pos	neg	neg	Shigella	discordant	concordant	neg	neg	neg	neg	neg	C	707	Qiagen stool prep kit	2017-10-11	2017-10-16	MiSeq	1.129	533333324	1725172	770553834	1.82254e+08	0.182254	2.38287e+09	2.38287	67.17	0.09
17_0018	EBP-culture discordant	CPL	neg	ipa	Shig	neg	neg	neg	neg	pos	pos	neg	neg	Shigella	discordant	concordant	neg	neg	neg	neg	neg	C	707	Qiagen stool prep kit	2017-10-11	2017-10-16	MiSeq	1.226	578419909	1868518	829032100	1.99214e+08	0.199214	2.09542e+09	2.09542	65.42	0.13
19_0009	EBP-culture discordant	CPL	neg	ipa	Shig	neg	neg	neg	neg	pos	pos	neg	neg	Shigella	discordant	concordant	neg	neg	neg	neg	neg	unique	1275	Qiagen stool prep kit	2019-06-20	2019-06-25	MiSeq	2.707	1278666284	4232538	2150040286	5.11538e+08	0.511538	2.81669e+09	2.81669	52.41	0.09
19_0034	EBP-culture discordant	CPL	neg	ipa	Shig	neg	neg	neg	neg	pos	pos	neg	neg	Shigella	discordant	concordant	neg	neg	neg	neg	neg	unique	1275	Qiagen stool prep kit	2019-10-15	2019-10-30	NextSeq	3.724	1572362798	9478204	3302520332	6.63967e+08	0.663967	3.60266e+08	0.360266	40.77	0.16
19_0091	EBP-culture discordant	CPL	neg	ipa	Shig	neg	neg	neg	neg	pos	pos	neg	neg	Shigella	discordant	concordant	neg	neg	pos	neg	Shigella	unique	1275	Qiagen stool prep kit	2019-10-15	2019-10-30	NextSeq	2.517	1067027475	1294644	453606342	9.13145e+07	0.0913145	5.54267e+10	55.4267	11.69	77.75
19_0122	EBP-culture discordant	CPL	neg	ipa	Shig	neg	neg	neg	neg	pos	pos	neg	neg	Shigella	discordant	concordant	neg	neg	neg	neg	neg	unique	1275	Qiagen stool prep kit	2020-01-17	2020-01-24	NextSeq	1.096	464877649	2845360	1013916216	2.0562e+08	0.20562	1.15305e+09	1.15305	46.09	0.09
19_0140	EBP-culture discordant	CPL	neg	ipa	Shig	neg	neg	neg	neg	pos	pos	neg	neg	Shigella	discordant	concordant	neg	neg	pos	neg	Shigella	unique	1275	Qiagen stool prep kit	2020-01-21	2020-01-24	NextSeq	2.027	856484002	5355864	1895001282	3.83255e+08	0.383255	2.11134e+09	2.11134	33.93	0.48
19_0142	EBP-culture discordant	CPL	neg	ipa	Shig	neg	neg	neg	neg	pos	pos	neg	neg	Shigella	discordant	concordant	neg	neg	pos	neg	Shigella	unique	1275	Qiagen stool prep kit	2020-01-21	2020-01-24	NextSeq	0.993	420834213	2509768	889756728	1.81466e+08	0.181466	9.69366e+07	0.0969366	98.39	0.01
19_0143	EBP-culture discordant	CPL	neg	ipa	Shig	neg	neg	neg	neg	pos	pos	neg	neg	Shigella	discordant	concordant	neg	neg	pos	neg	Shigella	unique	1275	Qiagen stool prep kit	2020-01-21	2020-01-24	NextSeq	0.79	342305134	2000258	680442358	1.39262e+08	0.139262	1.28942e+08	0.128942	95.51	0.07
18_0004	culture positive	Shared Health	STEC	nd	stx	nd	neg	nd	neg	nd	neg	nd	pos	stx	concordant	na	neg	neg	neg	pos	stx	unique	688	Qiagen stool prep kit	2018-05-01	2018-05-07	MiSeq	21.939	10343745354	21442536	11174253018	2.26536e+09	2.26536	2.59394e+09	2.59394	32.29	32.53
19_0001	culture positive	CPL	STEC	stx	nd	neg	nd	neg	nd	neg	nd	pos	nd	stx	concordant	na	neg	neg	neg	pos	stx	unique	1275	Qiagen stool prep kit	2019-08-08	2019-08-21	NextSeq	10.643	4487556765	309086	105938218	2.12303e+07	0.0212303	3.37455e+08	0.337455	1.08	96.76
19_0003	culture positive	CPL	STEC	stx	nd	neg	nd	neg	nd	neg	nd	pos	nd	stx	concordant	na	neg	neg	neg	pos	stx	unique	1275	Qiagen stool prep kit	2019-06-20	2019-06-25	MiSeq	2.827	1326822386	4715418	2346016966	5.48981e+08	0.548981	5.67688e+08	0.567688	70.87	0.34
19_0026	culture positive	CPL	STEC	stx	nd	neg	nd	neg	nd	neg	nd	pos	nd	stx	concordant	na	neg	neg	neg	pos	stx	unique	1275	Qiagen stool prep kit	2019-10-15	2019-10-30	NextSeq	2.466	1045082232	6014208	2108369204	4.2617e+08	0.42617	1.76291e+09	1.76291	64.59	0.93
19_0030	culture positive	CPL	STEC	stx	nd	neg	nd	neg	nd	neg	nd	pos	nd	stx	concordant	na	neg	neg	neg	pos	stx	unique	1275	Qiagen stool prep kit	2019-08-08	2019-08-21	NextSeq	6.728	2832397586	16133736	5577162778	1.11897e+09	1.11897	2.17285e+08	0.217285	81.73	0.27
19_0031	culture positive	CPL	STEC	stx	nd	neg	nd	neg	nd	neg	nd	pos	nd	stx	concordant	na	neg	neg	neg	pos	stx	unique	1275	Qiagen stool prep kit	2019-08-08	2019-08-21	NextSeq	6.751	2834285886	16615186	5729952156	1.14629e+09	1.14629	3.76749e+08	0.376749	66.05	0.12
19_0038	culture positive	CPL	STEC	stx	nd	neg	nd	neg	nd	neg	nd	pos	nd	stx	concordant	na	neg	neg	neg	pos	stx	G	1275	Qiagen stool prep kit	2019-08-08	2019-08-21	NextSeq	8.314	3559863593	34091068	7178375344	1.46734e+09	1.46734	9.3306e+08	0.93306	61.12	0.77
19_0039	culture positive	CPL	STEC	stx	nd	neg	nd	neg	nd	neg	nd	pos	nd	stx	concordant	na	neg	neg	neg	pos	stx	G	1275	Qiagen stool prep kit	2019-08-08	2019-08-21	NextSeq	4.93	2059774207	12201032	4141855894	8.22783e+08	0.822783	5.91086e+08	0.591086	65.18	1.1
19_0041	culture positive	CPL	STEC	stx	nd	neg	nd	neg	nd	neg	nd	pos	nd	stx	concordant	na	neg	neg	neg	pos	stx	unique	1275	Qiagen stool prep kit	2019-10-15	2019-10-30	NextSeq	5.461	2301934964	10414188	3632877602	7.29962e+08	0.729962	2.54991e+08	0.254991	66.93	24.78
19_0044	culture positive	CPL	STEC	stx	nd	neg	nd	neg	nd	neg	nd	pos	nd	stx	concordant	na	neg	neg	neg	pos	stx	unique	1275	Qiagen stool prep kit	2019-10-15	2019-10-30	NextSeq	3.293	1393768006	902834	315571710	6.41134e+07	0.0641134	4.67699e+08	0.467699	10.15	87.1
19_0046	culture positive	CPL	STEC	stx	nd	neg	nd	neg	nd	neg	nd	pos	nd	stx	concordant	na	neg	neg	neg	pos	stx	unique	1275	Qiagen stool prep kit	2019-10-15	2019-10-30	NextSeq	7.732	3319576377	18947426	6602487762	1.3544e+09	1.3544	8.13337e+07	0.0813337	89.68	1.32
19_0051	culture positive	CPL	STEC	stx	stx	neg	neg	neg	neg	neg	neg	pos	pos	stx	concordant	concordant	neg	neg	neg	pos	stx	unique	1275	Qiagen stool prep kit	2019-10-15	2019-10-30	NextSeq	16.9	6754544858	18150496	6227580240	1.2788e+09	1.2788	4.33973e+08	0.433973	72.27	0.78
19_0069	culture positive	CPL	STEC	stx	nd	neg	nd	neg	nd	neg	nd	pos	nd	stx	concordant	na	neg	neg	neg	pos	stx	I	1275	Qiagen stool prep kit	2019-10-15	2019-10-30	NextSeq	2.824	1194430647	6957462	2423826332	4.87941e+08	0.487941	1.43322e+09	1.43322	56.28	0.92
19_0071	culture positive	CPL	STEC	stx	nd	neg	nd	neg	nd	neg	nd	pos	nd	stx	concordant	na	neg	neg	neg	pos	stx	unique	1275	Qiagen stool prep kit	2019-10-15	2019-10-30	NextSeq	2.67	1130124908	6675414	2335263194	4.7024e+08	0.47024	1.65755e+09	1.65755	51.8	0.07
19_0072	culture positive	CPL	STEC	stx	nd	neg	nd	neg	nd	neg	nd	pos	nd	stx	concordant	na	neg	neg	neg	pos	stx	J	1275	Qiagen stool prep kit	2019-10-15	2019-10-30	NextSeq	4.615	1944612800	11830322	4076179318	8.102e+08	0.8102	4.54495e+08	0.454495	78.18	0.63
19_0073	culture positive	CPL	STEC	stx	nd	neg	nd	neg	nd	neg	nd	pos	nd	stx	concordant	na	neg	neg	neg	neg	neg	unique	1275	Qiagen stool prep kit	2019-10-15	2019-10-30	NextSeq	16.871	7145880780	27163722	9403975414	1.90439e+09	1.90439	1.01661e+09	1.01661	67.81	1.79
19_0074	culture positive	CPL	STEC	stx	nd	neg	nd	neg	nd	neg	nd	pos	nd	stx	concordant	na	neg	neg	neg	neg	neg	I	1275	Qiagen stool prep kit	2019-10-15	2019-10-30	NextSeq	33.109	13953867546	36767002	12446021710	2.50038e+09	2.50038	1.83541e+09	1.83541	34.11	1.64
19_0075	culture positive	CPL	STEC	stx	nd	neg	nd	neg	nd	neg	nd	pos	nd	stx	concordant	na	neg	neg	neg	neg	neg	I	1275	Qiagen stool prep kit	2019-10-15	2019-10-30	NextSeq	19.097	8074988490	26441222	9090965880	1.83645e+09	1.83645	1.75841e+09	1.75841	49.61	0.74
19_0083	culture positive	CPL	STEC	stx	nd	neg	nd	neg	nd	neg	nd	pos	nd	stx	concordant	na	neg	neg	neg	pos	stx	L	1275	Qiagen stool prep kit	2019-10-15	2019-10-30	NextSeq	2.682	1136643824	6558276	2302911018	4.6328e+08	0.46328	5.45268e+08	0.545268	28.56	1.8
19_0084	culture positive	CPL	STEC	stx	nd	neg	nd	neg	nd	neg	nd	pos	nd	stx	concordant	na	neg	neg	neg	pos	stx	I	1275	Qiagen stool prep kit	2019-10-15	2019-10-30	NextSeq	5.561	2340390028	14429510	4995758538	9.97389e+08	0.997389	1.88899e+09	1.88899	35.77	0.32
19_0085	culture positive	CPL	STEC	stx	nd	neg	nd	neg	nd	neg	nd	pos	nd	stx	concordant	na	neg	neg	neg	pos	stx	I	1275	Qiagen stool prep kit	2019-10-15	2019-10-30	NextSeq	2.016	851260137	5077582	1767128908	3.54405e+08	0.354405	2.14359e+09	2.14359	33.72	0.66
19_0086	culture positive	CPL	STEC	stx	nd	neg	nd	neg	nd	neg	nd	pos	nd	stx	concordant	na	neg	neg	neg	pos	stx	L	1275	Qiagen stool prep kit	2019-10-15	2019-10-30	NextSeq	4.542	1920304608	218144	73137190	1.46903e+07	0.0146903	1.67048e+09	1.67048	2.83	94.43
19_0087	culture positive	CPL	STEC	stx	nd	neg	nd	neg	nd	neg	nd	pos	nd	stx	concordant	na	neg	neg	neg	pos	stx	J	1275	Qiagen stool prep kit	2019-10-15	2019-10-30	NextSeq	2.576	1090076415	6473804	2262492956	4.54374e+08	0.454374	4.10032e+08	0.410032	85.32	0.46
19_0089	culture positive	CPL	STEC	stx	nd	neg	nd	neg	nd	neg	nd	pos	nd	stx	concordant	na	neg	neg	neg	pos	stx	unique	1275	Qiagen stool prep kit	2019-10-15	2019-10-30	NextSeq	3.461	1461927191	9371966	3185766502	6.44098e+08	0.644098	3.93327e+09	3.93327	54.04	1.87
19_0093	culture positive	CPL	STEC	stx	nd	neg	nd	neg	nd	neg	nd	pos	nd	stx	concordant	na	neg	neg	neg	pos	stx	unique	1275	Qiagen stool prep kit	2020-01-15	2020-01-24	NextSeq	10.193	4342149696	26768988	9154921124	1.86099e+09	1.86099	2.43253e+08	0.243253	22.39	0.33
19_0095	culture positive	CPL	STEC	stx	nd	neg	nd	neg	nd	neg	nd	pos	nd	stx	concordant	na	neg	neg	neg	neg	neg	unique	1275	Qiagen stool prep kit	2020-01-15	2020-01-24	NextSeq	0.994	421470467	1143938	407207630	8.27999e+07	0.0827999	5.3069e+08	0.53069	14.65	53.98
19_0119	culture positive	CPL	STEC	stx	nd	neg	nd	neg	nd	neg	nd	pos	nd	stx	concordant	na	neg	neg	neg	pos	stx	unique	1275	Qiagen stool prep kit	2020-01-17	2020-01-24	NextSeq	1.111	471146866	941438	334605666	6.7703e+07	0.067703	3.04254e+09	3.04254	14.91	65.52
19_0125	culture positive	CPL	STEC	stx	nd	neg	nd	neg	nd	neg	nd	pos	nd	stx	concordant	na	neg	neg	neg	pos	stx	unique	1275	Qiagen stool prep kit	2020-01-17	2020-01-24	NextSeq	5.902	2520256654	12145976	4198724532	8.57858e+08	0.857858	1.68243e+08	0.168243	73.04	18.64
19_0148	culture positive	CPL	STEC	stx	nd	neg	nd	neg	nd	neg	nd	pos	nd	stx	concordant	na	neg	neg	neg	pos	stx	unique	1275	Qiagen stool prep kit	2020-01-21	2020-01-24	NextSeq	0.915	395819539	446114	156036346	3.24117e+07	0.0324117	3.32363e+10	33.2363	7.57	78.98
19_0150	culture positive	CPL	STEC	stx	nd	neg	nd	neg	nd	neg	nd	pos	nd	stx	concordant	na	neg	neg	neg	neg	neg	unique	1275	Qiagen stool prep kit	2020-01-21	2020-01-24	NextSeq	12.717	5401553988	21995302	7559584780	1.53447e+09	1.53447	4.2683e+09	4.2683	44.68	1.36
17_0001	EBP-culture discordant	CPL	neg	stx	stx	neg	neg	neg	neg	neg	neg	pos	pos	stx	discordant	concordant	neg	neg	neg	neg	neg	unique	707	Qiagen stool prep kit	2017-10-11	2017-10-16	MiSeq	0.974	462977771	1373100	608000914	1.47886e+08	0.147886	4.2098e+08	0.42098	70.51	0.14
17_0002	EBP-culture discordant	CPL	neg	stx	stx	neg	neg	neg	neg	neg	neg	pos	pos	stx	discordant	concordant	neg	neg	neg	neg	neg	unique	707	Qiagen stool prep kit	2017-10-11	2017-10-16	MiSeq	0.61	289299846	866974	398569158	9.55453e+07	0.0955453	3.98264e+09	3.98264	71.98	0.18
17_0003	EBP-culture discordant	CPL	neg	stx	stx	neg	neg	neg	neg	neg	neg	pos	pos	stx	discordant	concordant	neg	neg	neg	neg	neg	unique	707	Qiagen stool prep kit	2017-10-11	2017-10-16	MiSeq	1.181	560613096	1658974	745115318	1.83215e+08	0.183215	7.22503e+09	7.22503	53.99	0.14
17_0004	EBP-culture discordant	CPL	neg	stx	stx	neg	neg	neg	neg	neg	neg	pos	pos	stx	discordant	concordant	neg	neg	neg	neg	neg	unique	707	Qiagen stool prep kit	2017-10-11	2017-10-16	MiSeq	1.573	745565387	2273872	1018581260	2.49808e+08	0.249808	2.19712e+09	2.19712	50.8	0.13
17_0005	EBP-culture discordant	CPL	neg	stx	stx	neg	neg	neg	neg	neg	neg	pos	pos	stx	discordant	concordant	neg	neg	neg	neg	neg	A	707	Qiagen stool prep kit	2017-10-11	2017-10-16	MiSeq	1.243	588011023	1863262	829124518	1.9672e+08	0.19672	1.50798e+09	1.50798	56.14	0.13
17_0006	EBP-culture discordant	CPL	neg	stx	stx	neg	neg	neg	neg	neg	neg	pos	pos	stx	discordant	concordant	neg	neg	neg	neg	neg	A	707	Qiagen stool prep kit	2017-10-11	2017-10-16	MiSeq	0.783	361765090	1460716	591472534	1.33977e+08	0.133977	2.611e+09	2.611	54.19	0.44
17_0007	EBP-culture discordant	CPL	neg	stx	stx	neg	neg	neg	neg	neg	neg	pos	pos	stx	discordant	concordant	neg	neg	neg	neg	neg	A	707	Qiagen stool prep kit	2017-10-11	2017-10-16	MiSeq	1.625	768582746	2424350	1099155764	2.64675e+08	0.264675	1.23619e+09	1.23619	45.08	0.18
17_0011	EBP-culture discordant	CPL	neg	stx	stx	neg	neg	neg	neg	neg	neg	pos	pos	stx	discordant	concordant	neg	neg	neg	neg	neg	B	707	Qiagen stool prep kit	2017-10-11	2017-10-16	MiSeq	0.964	445293199	77714	33117084	7.66085e+06	0.00766085	2.24592e+10	22.4592	0.5	93.7
17_0013	EBP-culture discordant	CPL	neg	stx	stx	neg	neg	neg	neg	neg	neg	pos	pos	stx	discordant	concordant	neg	neg	neg	neg	neg	unique	707	Qiagen stool prep kit	2017-10-11	2017-10-16	MiSeq	1.105	523426635	1636350	715746876	1.71622e+08	0.171622	1.16807e+09	1.16807	47.09	0.75
17_0015	EBP-culture discordant	CPL	neg	stx	stx	neg	neg	neg	neg	neg	neg	pos	pos	stx	discordant	concordant	neg	neg	neg	pos	stx	unique	707	Qiagen stool prep kit	2017-10-11	2017-10-16	MiSeq	1.539	727806976	2257638	1004264918	2.43548e+08	0.243548	5.42966e+09	5.42966	42.41	0.13
17_0016	EBP-culture discordant	CPL	neg	stx	stx	neg	neg	neg	neg	neg	neg	pos	pos	stx	discordant	concordant	neg	neg	neg	neg	neg	unique	707	Qiagen stool prep kit	2017-10-11	2017-10-16	MiSeq	1.322	626759691	1921028	859629372	2.1004e+08	0.21004	7.94519e+08	0.794519	58.35	0.13
17_0024	EBP-culture discordant	CPL	neg	stx	stx	neg	neg	neg	neg	neg	neg	pos	pos	stx	discordant	concordant	neg	neg	neg	neg	neg	unique	707	Qiagen stool prep kit	2017-10-11	2017-10-16	MiSeq	1.576	742549204	2475064	1096319930	2.56799e+08	0.256799	2.2838e+09	2.2838	45.82	0.13
19_0011	EBP-culture discordant	CPL	neg	stx	stx	neg	neg	neg	neg	neg	neg	pos	pos	stx	discordant	concordant	neg	neg	neg	pos	stx	unique	1275	Qiagen stool prep kit	2019-08-08	2019-08-21	NextSeq	5.54	2337737229	12616714	4396531744	8.84671e+08	0.884671	1.43218e+08	0.143218	78.13	3.98
19_0013	EBP-culture discordant	CPL	neg	stx	stx	neg	neg	neg	neg	neg	neg	pos	pos	stx	discordant	concordant	neg	neg	neg	pos	stx	unique	1275	Qiagen stool prep kit	2019-08-08	2019-08-21	NextSeq	3.977	1679715792	258526	89269002	1.79271e+07	0.0179271	8.30437e+09	8.30437	1.42	95.56
19_0022	EBP-culture discordant	CPL	neg	stx	stx	neg	neg	neg	neg	neg	neg	pos	pos	stx	discordant	concordant	neg	neg	neg	neg	neg	unique	1275	Qiagen stool prep kit	2019-08-08	2019-08-21	NextSeq	4.942	2082461963	11802824	4087832606	8.19753e+08	0.819753	1.51644e+09	1.51644	36.28	0.06
19_0024	EBP-culture discordant	CPL	neg	stx	stx	neg	neg	neg	neg	neg	neg	pos	pos	stx	discordant	concordant	neg	neg	neg	neg	neg	unique	1275	Qiagen stool prep kit	2019-08-08	2019-08-21	NextSeq	4.816	2034907271	11198612	3897862348	7.85392e+08	0.785392	4.85668e+08	0.485668	64.65	0.17
19_0045	EBP-culture discordant	CPL	neg	stx	stx	neg	neg	neg	neg	neg	neg	pos	pos	stx	discordant	concordant	neg	neg	neg	neg	neg	unique	1275	Qiagen stool prep kit	2019-10-15	2019-10-30	NextSeq	4.693	1970063303	12274170	4209694906	8.39694e+08	0.839694	4.05064e+09	4.05064	44.01	0.1
19_0049	EBP-culture discordant	CPL	neg	stx	stx	neg	neg	neg	neg	neg	neg	pos	pos	stx	discordant	concordant	neg	neg	neg	neg	neg	unique	1275	Qiagen stool prep kit	2019-10-15	2019-10-30	NextSeq	3.781	1583356541	9799458	3341852302	6.67015e+08	0.667015	1.50651e+09	1.50651	64.81	1.08
19_0106	EBP-culture discordant	CPL	neg	stx	stx	neg	neg	neg	neg	neg	neg	pos	pos	stx	discordant	concordant	neg	neg	neg	neg	neg	unique	1275	Qiagen stool prep kit	2020-01-16	2020-01-24	NextSeq	3.332	1400367166	8615914	3006610032	6.04613e+08	0.604613	4.34291e+09	4.34291	42.01	4
17_0009	EBP-culture discordant	CPL	neg	spa, stx	stx	neg	neg	pos	neg	neg	neg	pos	pos	stx and 1 conflict (Salm)	discordant	discordant	neg	neg	neg	neg	neg	B	707	Qiagen stool prep kit	2017-10-11	2017-10-16	MiSeq	1.304	616672165	1974896	887674050	2.08748e+08	0.208748	1.84668e+08	0.184668	3.65	0.92
19_0151	culture positive	Shared Health	Campy	nd	nd	nd	nd	nd	nd	nd	nd	nd	nd	na	na	na	pos	neg	neg	neg	Campy	unique	688	Qiagen stool prep kit	2019-05-10	2019-05-28	MiSeq	9.348	4438794635	13192914	7141625028	1.77034e+09	1.77034	7.04521e+08	0.704521	63.09	0.41
19_0152	culture positive	Shared Health	Salm	nd	nd	nd	nd	nd	nd	nd	nd	nd	nd	na	na	na	neg	pos	neg	neg	Salmonella	unique	688	Qiagen stool prep kit	2019-06-21	2019-06-25	MiSeq	3.249	1539177883	4275596	2244752756	5.38265e+08	0.538265	8.18643e+08	0.818643	75.92	12.36
19_0153	culture positive	Shared Health	Campy	nd	nd	nd	nd	nd	nd	nd	nd	nd	nd	na	na	na	pos	neg	neg	neg	Campy	unique	688	Qiagen stool prep kit	2019-09-12	2019-09-17	MiSeq	7.907	3747427741	6821818	2506377424	5.72272e+08	0.572272	5.77581e+08	0.577581	79.08	5.94
19_0154	culture positive	Shared Health	Salm	nd	nd	nd	nd	nd	nd	nd	nd	nd	nd	na	na	na	neg	pos	neg	neg	Salmonella	unique	688	Qiagen stool prep kit	2019-05-10	2019-05-28	MiSeq	14.285	6742510613	12213834	6606518482	1.59327e+09	1.59327	1.22205e+08	0.122205	16.09	46.02
19_0155	culture positive	Shared Health	Salm	nd	nd	nd	nd	nd	nd	nd	nd	nd	nd	na	na	na	neg	pos	neg	neg	Salmonella	unique	688	Qiagen stool prep kit	2019-03-12	2019-03-20	NextSeq	11.7	4651502558	34091068	11695939112	2.36696e+09	2.36696	3.05297e+08	0.305297	5.97	73.67
19_0156	culture positive	Shared Health	Salm	nd	nd	nd	nd	nd	nd	nd	nd	nd	nd	na	na	na	neg	pos	neg	neg	Salmonella	unique	688	Qiagen stool prep kit	2019-05-10	2019-05-28	MiSeq	7.664	3643589706	11021052	6108433296	1.49266e+09	1.49266	3.81864e+07	0.0381864	87.25	0.07
19_0157	culture positive	Shared Health	Shig	nd	nd	nd	nd	nd	nd	nd	nd	nd	nd	na	na	na	neg	neg	pos	neg	Shigella	unique	688	Qiagen stool prep kit	2019-06-21	2019-06-25	MiSeq	3.419	1617431918	5325810	2723419068	6.42266e+08	0.642266	1.99543e+09	1.99543	42.93	0.3
19_0158	culture positive	Shared Health	STEC	nd	nd	nd	nd	nd	nd	nd	nd	nd	nd	na	na	na	neg	neg	neg	pos	stx	unique	688	Qiagen stool prep kit	2019-06-21	2019-06-25	MiSeq	2.362	1115169144	3593868	1829473704	4.34563e+08	0.434563	1.40961e+09	1.40961	60.94	0.1
19_0159	culture positive	Shared Health	STEC	nd	nd	nd	nd	nd	nd	nd	nd	nd	nd	na	na	na	neg	neg	neg	pos	stx	unique	688	Qiagen stool prep kit	2019-06-21	2019-06-25	MiSeq	3.088	1462950063	3199318	1661782876	3.98565e+08	0.398565	3.79418e+07	0.0379418	70.35	29.17
19_0160	culture positive	Shared Health	Campy	nd	nd	nd	nd	nd	nd	nd	nd	nd	nd	na	na	na	pos	neg	neg	neg	Campy	unique	688	Qiagen stool prep kit	2019-09-12	2019-09-17	MiSeq	5.339	2531297958	1241334	484621848	1.0757e+08	0.10757	5.71443e+09	5.71443	5.94	76.22
19_0161	culture positive	Shared Health	STEC	nd	nd	nd	nd	nd	nd	nd	nd	nd	nd	na	na	na	pos	neg	neg	pos	Campy, stx	unique	688	Qiagen stool prep kit	2019-09-12	2019-09-17	MiSeq	26.474	12163254245	13827028	5112696656	1.1534e+09	1.1534	2.97013e+08	0.297013	47.98	1.02
19_0162	culture positive	Shared Health	Campy	nd	nd	nd	nd	nd	nd	nd	nd	nd	nd	na	na	na	pos	neg	neg	neg	Campy	unique	688	Qiagen stool prep kit	2019-09-12	2019-09-17	MiSeq	10.671	5049182518	1356488	495345158	1.10596e+08	0.110596	8.67383e+08	0.867383	10.36	86.1
19_0163	culture positive	Shared Health	STEC	nd	nd	nd	nd	nd	nd	nd	nd	nd	nd	na	na	na	neg	neg	neg	pos	stx	unique	688	Qiagen stool prep kit	2019-09-12	2019-09-17	MiSeq	22.415	10233410903	40424	11916938	2.46506e+06	0.00246506	2.97711e+09	2.97711	0.1	98.18
P23C0	Healthy	NCBI	healthy	nd	nd	nd	nd	nd	nd	nd	nd	nd	nd	na	na	na	neg	neg	neg	neg	neg	unique	1485	na	unknown	unknown	HiSeq	37.265	15693082454							38.66	0.03
P25C0	Healthy	NCBI	healthy	nd	nd	nd	nd	nd	nd	nd	nd	nd	nd	na	na	na	neg	neg	neg	neg	neg	unique	1485	na	unknown	unknown	HiSeq	19.413	8175354908							46.69	0.04
P38C0	Healthy	NCBI	healthy	nd	nd	nd	nd	nd	nd	nd	nd	nd	nd	na	na	na	neg	neg	neg	neg	neg	unique	1485	na	unknown	unknown	HiSeq	43.296	18160183598							49.15	0.03
P6C0	Healthy	NCBI	healthy	nd	nd	nd	nd	nd	nd	nd	nd	nd	nd	na	na	na	neg	neg	neg	neg	neg	unique	1485	na	unknown	unknown	HiSeq	27.693	11661826428							41.79	0.03
P7C0	Healthy	NCBI	healthy	nd	nd	nd	nd	nd	nd	nd	nd	nd	nd	na	na	na	neg	neg	neg	neg	neg	unique	1485	na	unknown	unknown	HiSeq	20.67	8704485020							38.4	0.04
P8C0	Healthy	NCBI	healthy	nd	nd	nd	nd	nd	nd	nd	nd	nd	nd	na	na	na	neg	neg	neg	neg	neg	unique	1485	na	unknown	unknown	HiSeq	49.639	20903999896							71.32	0.02
																													2.36405e+09				0.778933				13.8376
																																														0.13
																																														5.94

## Sheet: Campy
Campylobacter
StudyID	Set	Culture	BDMax	BioFire	PCRsummary	NEW k27_cgMLST_50th	NEW_VFDB_50th	CMg	composite	NEW%Campy(Kraken)
14_0001	Validation	neg	nd	nd	nd	0.39474	0	neg	na	0.01
14_0005	Training	neg	nd	nd	nd	0.2443	0	neg	na	0.01
14_0002	Validation	pos	nd	nd	nd	90.8509	74.7919	pos	pos	0.21
14_0004	Validation	pos	nd	nd	nd	86.4923	72.7766	pos	pos	0.08
14_0006	Validation	neg	nd	nd	nd	0.14225	0	neg	na	0.04
14_0008	Validation	neg	nd	nd	nd	0.21127	0	neg	na	0.01
15_0001	Validation	neg	nd	nd	nd	0.19486	0	neg	na	0.01
15_0004	Training	neg	nd	neg	neg	0	0	neg	neg	0.01
14_0003	Training	pos	nd	nd	nd	35.4732	19.7652	pos	pos	0.04
15_0003	Validation	neg	nd	neg	neg	0	0	neg	neg	0
15_0005	Validation	neg	nd	neg	neg	0	0	neg	neg	0.01
15_0008	Training	neg	nd	neg	neg	0	0	neg	neg	0.02
15_0006	Validation	neg	nd	neg	neg	0	0	neg	neg	0
15_0007	Validation	neg	nd	neg	neg	0	0	neg	neg	0
15_0011	Training	neg	nd	neg	neg	0	0	neg	neg	0
15_0009	Validation	neg	nd	neg	neg	0.2027	0	neg	neg	0.03
15_0010	Validation	neg	nd	neg	neg	0.07452	0	neg	neg	0.01
15_0014	Training	neg	nd	neg	neg	0.07297	0	neg	neg	0.04
15_0015	Training	neg	nd	neg	neg	0	0	neg	neg	0
15_0012	Validation	neg	nd	neg	neg	0	0	neg	neg	0.01
15_0013	Validation	neg	nd	neg	neg	0	0	neg	neg	0.01
15_0016	Validation	neg	nd	neg	neg	0	0	neg	neg	0
15_0017	Validation	neg	nd	neg	neg	0.09328	0	neg	neg	0.03
15_0020	Training	neg	nd	neg	neg	0	0	neg	neg	0
15_0018	Validation	neg	nd	neg	neg	0.10549	0	neg	neg	0.02
15_0019	Validation	neg	nd	neg	neg	0	0	neg	neg	0
15_0023	Training	neg	nd	neg	neg	0	0	neg	neg	0.01
15_0021	Validation	neg	nd	neg	neg	0.17331	0	neg	neg	0.03
15_0026	Training	neg	nd	neg	neg	0.43924	0	neg	neg	0.09
15_0022	Validation	neg	nd	neg	neg	0.16287	0	neg	neg	0.08
15_0024	Validation	neg	nd	neg	neg	0	0	neg	neg	0.01
15_0025	Validation	neg	nd	pos	pos	0.3096	0	neg	na	0.01
15_0027	Validation	neg	nd	neg	neg	0.07849	0	neg	neg	0
15_0028	Validation	neg	nd	neg	neg	0.27829	0	neg	neg	0.03
15_0032	Training	neg	nd	neg	neg	0	0	neg	neg	0
15_0029	Validation	neg	nd	neg	neg	0.1989	0	neg	neg	0
15_0034	Training	neg	nd	neg	neg	0.16407	0	neg	neg	0.01
15_0030	Validation	neg	nd	neg	neg	0.07524	0	neg	neg	0.01
15_0031	Validation	neg	nd	neg	neg	0.07143	0	neg	neg	0.28
15_0033	Validation	neg	nd	neg	neg	0.21892	0	neg	neg	0.02
15_0038	Training	neg	nd	neg	neg	0	0	neg	neg	0.01
15_0035	Validation	neg	nd	neg	neg	0.05647	0	neg	neg	0
15_0041	Training	neg	nd	neg	neg	0	0	neg	neg	0.01
15_0036	Validation	neg	nd	neg	neg	0.02208	0	neg	neg	0
15_0037	Validation	neg	nd	neg	neg	0	0	neg	neg	0.23
15_0044	Training	neg	nd	neg	neg	0	0	neg	neg	0
15_0039	Validation	pos	nd	nd	nd	29.3706	13.6322	pos	pos	0.16
15_0040	Validation	neg	nd	neg	neg	0.16529	0	neg	neg	0.01
15_0042	Validation	neg	nd	neg	neg	0.12658	0	neg	neg	0.23
15_0043	Validation	neg	nd	neg	neg	0.10309	0	neg	neg	0.02
15_0045	Validation	neg	nd	neg	neg	0	0	neg	neg	0.01
15_0050	Training	neg	nd	neg	neg	0.02829	0	neg	neg	0.02
15_0046	Validation	neg	nd	neg	neg	0.625	0	neg	neg	0.23
15_0053	Training	neg	nd	neg	neg	0.1868	0	neg	neg	0.02
15_0051	Training	neg	nd	nd	nd	0.20619	0	neg	na	0
15_0047	Validation	neg	nd	neg	neg	0	0	neg	neg	0.04
15_0056	Training	neg	nd	neg	neg	0.11315	0	neg	neg	0.01
15_0048	Validation	neg	nd	neg	neg	0.05453	0	neg	neg	0.03
15_0049	Validation	neg	nd	neg	neg	0	0	neg	neg	0.01
15_0052	Validation	neg	nd	neg	neg	0	0	neg	neg	0
15_0054	Validation	neg	nd	nd	nd	0.13135	0	neg	na	0.04
15_0055	Validation	neg	nd	neg	neg	0	0	neg	neg	0.02
15_0057	Validation	neg	nd	neg	neg	0	0	neg	neg	0
15_0062	Training	neg	nd	neg	neg	0.2649	0	neg	neg	0.03
15_0058	Validation	neg	nd	neg	neg	0.2461	0	neg	neg	0.03
15_0059	Validation	neg	nd	neg	neg	0	0	neg	neg	0
15_0065	Training	neg	nd	neg	neg	0.20243	0	neg	neg	0.01
15_0060	Validation	neg	nd	neg	neg	0.26025	0	neg	neg	0.01
15_0061	Validation	neg	nd	neg	neg	0.22108	0	neg	neg	0.02
15_0063	Validation	neg	nd	neg	neg	0.08368	0	neg	neg	0.01
15_0064	Validation	neg	nd	neg	neg	0.07369	0	neg	neg	0.02
15_0066	Validation	neg	nd	neg	neg	0.07524	0	neg	neg	0.02
15_0071	Training	neg	nd	neg	neg	0	0	neg	neg	0.01
15_0067	Validation	neg	nd	neg	neg	0.09542	0	neg	neg	0.01
15_0068	Validation	neg	nd	neg	neg	0.17346	0	neg	neg	0.01
15_0074	Training	neg	nd	neg	neg	0.12571	0	neg	neg	0.02
15_0069	Validation	neg	nd	neg	neg	0	0	neg	neg	0
15_0070	Validation	neg	nd	neg	neg	0	0	neg	neg	0.01
15_0077	Training	neg	nd	neg	neg	0.29821	0	neg	neg	0.02
15_0078	Training	neg	nd	neg	neg	0.09785	0	neg	neg	0.02
15_0079	Training	neg	nd	neg	neg	0	0	neg	neg	0
15_0072	Validation	neg	nd	neg	neg	0.54512	0	neg	neg	0.21
15_0073	Validation	neg	nd	neg	neg	0	0	neg	neg	0.01
15_0075	Validation	neg	nd	neg	neg	0.27058	0	neg	neg	0.01
15_0083	Training	neg	nd	neg	neg	0.14296	0	neg	neg	0.01
15_0076	Validation	neg	nd	neg	neg	0.05647	0	neg	neg	0.01
15_0080	Validation	neg	nd	neg	neg	0.06203	0	neg	neg	0.01
15_0086	Training	neg	nd	neg	neg	0	0	neg	neg	0.01
15_0081	Validation	neg	nd	neg	neg	0.37267	0	neg	neg	0.03
15_0082	Validation	neg	nd	neg	neg	0.17346	0	neg	neg	0.01
17_0001	Training	neg	neg	neg	neg	0	0	neg	neg	0.02
15_0084	Validation	neg	nd	neg	neg	0.07369	0	neg	neg	0.01
15_0085	Validation	neg	nd	neg	neg	0.17865	0	neg	neg	0.04
17_0004	Training	neg	neg	neg	neg	0.1569	0	neg	neg	0.03
15_0087	Validation	neg	nd	neg	neg	0	0	neg	neg	0
15_0088	Validation	neg	nd	neg	neg	0	0	neg	neg	0.01
17_0007	Training	neg	neg	neg	neg	0.0523	0	neg	neg	0.03
17_0002	Validation	neg	neg	neg	neg	0.14599	0	neg	neg	0.02
17_0003	Validation	neg	neg	neg	neg	0.13135	0	neg	neg	0.03
17_0010	Training	neg	neg	neg	neg	0	0	neg	neg	0.01
17_0005	Validation	neg	neg	neg	neg	0	0	neg	neg	0.04
17_0013	Training	neg	neg	neg	neg	0	0	neg	neg	0.02
17_0006	Validation	neg	neg	neg	neg	0.07289	0	neg	neg	0.03
17_0008	Validation	neg	neg	neg	neg	0.16821	0	neg	neg	0.02
17_0009	Validation	neg	neg	neg	neg	0	0	neg	neg	0.01
17_0011	Validation	neg	neg	neg	neg	0	0	neg	neg	0
17_0012	Validation	neg	neg	pos	conflict	0.14058	0	neg	neg	0.01
17_0014	Validation	pos	pos	nd	pos	95.6754	92.404	pos	pos	15.33
17_0015	Validation	neg	neg	neg	neg	0.14058	0	neg	neg	0.03
17_0024	Training	neg	neg	neg	neg	0.12658	0	neg	neg	0.02
17_0033	Training	neg	nd	neg	neg	0	0	neg	neg	0.01
18_0004	Training	neg	nd	neg	neg	0.20367	0	neg	neg	0.01
17_0022	Training	neg	pos	neg	conflict	0.20157	0	neg	neg	0.04
17_0016	Validation	neg	neg	neg	neg	0.14663	0	neg	neg	0.13
17_0017	Validation	neg	neg	neg	neg	0.04878	0	neg	neg	0.06
17_0018	Validation	neg	neg	neg	neg	0.05133	0	neg	neg	0.07
19_0047	Validation	neg	pos	pos	pos	0	0	neg	pos	0.02
17_0020	Validation	neg	neg	neg	neg	0.35026	0	neg	neg	0.03
17_0021	Validation	neg	neg	neg	neg	0.03902	0	neg	neg	0.14
17_0031	Training	neg	nd	nd	nd	0	0	neg	na	0.01
17_0023	Validation	neg	pos	neg	conflict	0.88496	0	neg	neg	0.03
17_0025	Validation	pos	nd	nd	nd	25.0457	4.61538	pos	pos	0.07
17_0035	Training	neg	nd	nd	nd	0.1933	0	neg	na	0.01
17_0026	Validation	neg	nd	nd	nd	0.27829	0	neg	na	0.04
18_0001	Training	neg	nd	nd	nd	0.45732	0	neg	na	0.03
17_0027	Validation	neg	nd	nd	nd	0.14225	0	neg	na	0.02
17_0029	Validation	neg	nd	nd	nd	0.14577	0	neg	na	0
17_0030	Validation	neg	nd	nd	nd	0	0	neg	na	0.01
18_0007	Training	neg	nd	nd	nd	0.07524	0	neg	na	0
17_0032	Validation	neg	nd	nd	nd	0	0	neg	na	0
17_0034	Validation	neg	nd	nd	nd	0.12407	0	neg	na	0.02
17_0036	Validation	neg	nd	nd	nd	0.31397	0	neg	na	0.04
19_0002	Training	nd	neg	nd	neg	0.23121	0	neg	na	0.07
18_0002	Validation	neg	nd	nd	nd	0	0	neg	na	0
19_0004	Training	nd	neg	nd	neg	0.1387	0	neg	na	0.01
18_0003	Validation	neg	nd	nd	nd	0.28409	0	neg	na	0.01
19_0040	Training	neg	pos	neg	conflict	0.14963	0	neg	neg	0.03
19_0052	Training	neg	pos	neg	conflict	0	0	neg	neg	0
19_0053	TRAINING	neg	ind	neg	conflict	0.14595	0	neg	neg	0
18_0005	Validation	pos	nd	nd	nd	74.7859	54.8491	pos	pos	3.03
19_0082	Training	neg	pos	neg	conflict	0	0	neg	neg	0.02
18_0006	Validation	neg	nd	nd	nd	0	0	neg	na	0.01
18_0008	Validation	neg	nd	nd	nd	0.29821	0	neg	na	0.02
18_0009	Validation	neg	nd	nd	nd	0	0	neg	na	0.01
19_0013	Training	nd	neg	neg	neg	0	0	neg	neg	0.07
19_0001	Validation	nd	neg	nd	neg	0	0	neg	na	0.01
19_0088	Training	neg	ind	neg	conflict	0.08741	0	neg	neg	0.09
19_0003	Validation	nd	neg	nd	neg	0	0	neg	na	0.01
19_0005	Validation	nd	neg	nd	neg	0	0	neg	na	0.01
19_0019	Training	nd	neg	nd	neg	0	0	neg	na	0.04
19_0022	Training	nd	neg	neg	neg	0	0	neg	neg	0.02
19_0006	Validation	pos	pos	nd	pos	96.181	93.1347	pos	pos	0.95
19_0103	Training	neg	pos	neg	conflict	0.0523	0	neg	neg	0.02
19_0008	Validation	neg	ind	neg	conflict	0.03995	0	neg	neg	0.02
19_0009	Validation	nd	neg	neg	neg	0.04878	0	neg	neg	0.01
19_0010	Validation	nd	neg	neg	neg	0	0	neg	neg	0.01
19_0011	Validation	nd	neg	neg	neg	0	0	neg	neg	0
19_0012	Validation	pos	pos	nd	pos	97.812	100	pos	pos	2.13
19_0058	Validation	neg	pos	pos	pos	2.35081	0	pos	pos	0.05
19_0015	Validation	pos	pos	nd	pos	100	100	pos	pos	2.84
19_0017	Validation	pos	pos	nd	pos	60.1298	41.8744	pos	pos	0.76
19_0154	Training	neg	nd	nd	nd	0.85227	0	neg	na	0.23
19_0018	Validation	nd	neg	nd	neg	0.29821	0	neg	na	0.13
19_0102	Validation	neg	pos	pos	pos	0	0	neg	pos	0
19_0023	Validation	nd	neg	nd	neg	0	0	neg	na	0.01
19_0024	Validation	nd	neg	neg	neg	0.04878	0	neg	neg	0.02
19_0026	Validation	nd	neg	nd	neg	0	0	neg	na	0.01
19_0027	Validation	pos	pos	nd	pos	37.0093	22.1485	pos	pos	0.04
19_0157	Training	neg	nd	nd	nd	0	0	neg	na	0.06
19_0034	Training	nd	neg	neg	neg	0	0	neg	neg	0.25
19_0037	Training	nd	neg	neg	neg	0	0	neg	neg	0.02
19_0028	Validation	pos	pos	nd	pos	88.6454	82.669	pos	pos	0.23
19_0029	Validation	nd	neg	nd	neg	0.06623	0	neg	na	0.01
19_0030	Validation	nd	neg	nd	neg	0.2027	0	neg	na	0
19_0031	Validation	nd	neg	nd	neg	0.26714	0	neg	na	0.01
19_0032	Validation	nd	neg	nd	neg	0.09372	0	neg	na	0
19_0033	Validation	nd	neg	nd	neg	0.26631	0	neg	na	0.01
19_0045	Training	nd	neg	neg	neg	0.23753	0	neg	neg	0.01
19_0046	Training	nd	neg	nd	neg	0	0	neg	na	0
19_0049	Training	nd	neg	neg	neg	0.08741	0	neg	neg	0.05
19_0158	Training	neg	nd	nd	nd	0	0	neg	na	0.01
19_0035	Validation	nd	neg	pos	conflict	19.8999	0	pos	na	0.03
15_0002	Validation	neg	nd	nd	nd	0.17047	0	neg	na	0
19_0163	Training	neg	nd	nd	nd	0	0	neg	na	0.03
19_0091	Training	nd	neg	neg	neg	0	0	neg	neg	0.01
19_0056	Training	nd	neg	nd	neg	0.27174	0	neg	na	0.04
19_0061	Training	nd	neg	nd	neg	0	0	neg	na	0.04
19_0038	Validation	nd	neg	nd	neg	0.20367	0	neg	na	0.01
19_0039	Validation	nd	neg	nd	neg	0.07468	0	neg	na	0.01
19_0041	Validation	nd	neg	nd	neg	0.14225	0	neg	na	0.01
19_0042	Validation	pos	pos	nd	pos	97.2942	99.2911	pos	pos	8.94
19_0044	Validation	nd	neg	nd	neg	0	0	neg	na	0
19_0071	Training	nd	neg	nd	neg	0.0523	0	neg	na	0.03
19_0080	Training	neg	pos	pos	pos	8.1537	0	pos	pos	0.01
19_0073	Training	nd	neg	nd	neg	0.23175	0	neg	na	0.01
19_0048	Validation	pos	pos	nd	pos	49.4473	37.4168	pos	pos	0.06
19_0113	Validation	neg	pos	pos	pos	0	0	neg	pos	0.03
19_0076	Training	nd	neg	nd	neg	0.11986	0	neg	na	0.03
19_0036	Validation	nd	neg	pos	conflict	65.324	0.41436	pos	na	0.23
19_0054	Validation	pos	pos	nd	pos	42.1628	24.7867	pos	pos	0.06
19_0057	Validation	pos	pos	pos	pos	0.39735	0	neg	pos	0.02
19_0085	Training	nd	neg	nd	neg	0	0	neg	na	0.1
19_0129	Validation	neg	pos	pos	pos	9.91432	0	pos	pos	0.03
19_0059	Validation	nd	neg	pos	conflict	26.7188	0	pos	na	0.16
19_0089	Training	nd	neg	nd	neg	0.14085	0	neg	na	0.01
19_0060	Validation	pos	pos	nd	pos	28.8471	8.68778	pos	pos	0.03
19_0093	Training	nd	neg	nd	neg	0.3736	0	neg	na	0.01
19_0062	Validation	nd	neg	nd	neg	0	0	neg	na	0
19_0063	Validation	pos	pos	nd	pos	19.9734	11.7512	pos	pos	0.02
19_0106	Training	nd	neg	neg	neg	0.29821	0	neg	neg	0.02
19_0115	Training	nd	neg	neg	neg	0.17027	0	neg	neg	0.02
19_0064	Validation	pos	pos	nd	pos	56.9052	41.8033	pos	pos	1.12
19_0117	Training	nd	neg	neg	neg	0.1861	0	neg	neg	0.01
19_0065	Validation	nd	neg	nd	neg	0	0	neg	na	0.03
19_0066	Validation	nd	neg	nd	neg	0.05658	0	neg	na	0.04
19_0068	Validation	nd	neg	nd	neg	0	0	neg	na	0.01
19_0140	Training	nd	neg	neg	neg	0	0	neg	neg	0.02
19_0069	Validation	nd	neg	nd	neg	0.08741	0	neg	na	0.03
19_0142	Training	nd	neg	neg	neg	0	0	neg	neg	0
19_0072	Validation	nd	neg	nd	neg	0	0	neg	na	0.01
19_0074	Validation	nd	neg	nd	neg	0.29477	0	neg	na	0.09
P25C0	Training	nd	nd	nd	nd	0.40617	0	neg	neg	0.05
19_0075	Validation	nd	neg	nd	neg	0.26025	0	neg	na	0.02
19_0077	Validation	neg	pos	neg	conflict	0	0	neg	neg	0.01
19_0125	Training	nd	neg	nd	neg	0	0	neg	na	0.01
19_0078	Validation	pos	pos	pos	pos	95.3304	90.1365	pos	pos	9.36
19_0133	Training	nd	neg	nd	neg	0	0	neg	na	0.04
19_0134	Training	nd	neg	nd	neg	0	0	neg	na	0.24
19_0081	Validation	pos	pos	nd	pos	95.3304	90.1365	pos	pos	17.01
19_0083	Validation	nd	neg	nd	neg	0.06625	0	neg	na	0.02
19_0084	Validation	nd	neg	nd	neg	0.17346	0	neg	na	0.06
19_0139	Training	nd	neg	nd	neg	0.19976	0	neg	na	0.01
P8C0	Training	nd	nd	nd	nd	0.23971	0	neg	neg	0.01
14_0007	Training	pos	nd	neg	neg	0.31381	0	neg	pos	0.01
19_0086	Validation	nd	neg	nd	neg	0	0	neg	na	0.01
19_0148	Training	nd	neg	nd	neg	0	0	neg	na	0
19_0087	Validation	nd	neg	nd	neg	0	0	neg	na	0.01
19_0150	Training	nd	neg	nd	neg	0.2546	0	neg	na	0.02
19_0090	Validation	neg	pos	neg	conflict	0.24814	0	neg	neg	0
19_0092	Validation	neg	pos	neg	conflict	0.1387	0	neg	neg	0.01
19_0094	Validation	pos	pos	nd	pos	7.21649	0	pos	pos	0.01
19_0095	Validation	nd	neg	nd	neg	0	0	neg	na	0.02
19_0096	Validation	nd	neg	nd	neg	0	0	neg	na	0.01
19_0098	Validation	pos	pos	nd	pos	7.46753	0	pos	pos	0.02
19_0051	Validation	nd	neg	neg	neg	0.14738	0	neg	neg	0.01
19_0099	Validation	nd	neg	neg	neg	0.07949	0	neg	neg	0.03
19_0101	Validation	pos	pos	nd	pos	47.8544	24.2588	pos	pos	0.05
19_0131	Validation	neg	pos	pos	pos	0	0	neg	pos	0.01
17_0028	Training	pos	nd	nd	nd	95.7166	92.0588	pos	pos	4.52
19_0104	Validation	pos	pos	nd	pos	43.3628	32.3555	pos	pos	1.94
19_0105	Validation	neg	pos	neg	conflict	0.09597	0	neg	neg	0.01
19_0107	Validation	pos	pos	nd	pos	15.3907	0	pos	pos	0.04
19_0132	Validation	neg	pos	pos	pos	2.14861	0	pos	pos	0.02
19_0108	Validation	nd	neg	nd	neg	0.12658	0	neg	na	0.08
17_0019	Validation	neg	pos	pos	pos	20.9416	0.87977	pos	pos	0.09
19_0110	Validation	pos	pos	nd	pos	48.5014	36.4477	pos	pos	0.42
19_0111	Validation	pos	pos	nd	pos	23.8193	6.98878	pos	pos	0.03
19_0050	Validation	neg	pos	pos	pos	19.7765	5.16899	pos	pos	0.02
19_0016	Training	neg	pos	pos	pos	24.9325	12.6058	pos	pos	0.09
19_0114	Validation	neg	ind	neg	conflict	0.05647	0	neg	neg	0.03
19_0116	Validation	nd	neg	nd	neg	0	0	neg	na	0.01
19_0118	Validation	neg	pos	pos	pos	70.4013	50.3272	pos	pos	0.17
19_0119	Validation	nd	neg	nd	neg	0	0	neg	na	0.03
19_0120	Validation	pos	pos	nd	pos	70.2128	58.6011	pos	pos	0.47
19_0007	Training	pos	pos	nd	pos	9.80149	0	pos	pos	0.01
19_0122	Validation	nd	neg	neg	neg	0	0	neg	neg	0.02
19_0123	Validation	neg	pos	neg	conflict	0	0	neg	neg	0
19_0124	Validation	nd	neg	nd	neg	0	0	neg	na	0
19_0020	Training	pos	pos	nd	pos	91.6828	84.1521	pos	pos	1.53
19_0025	Training	pos	pos	nd	pos	24.0458	11.0488	pos	pos	0.03
19_0126	Validation	pos	pos	nd	pos	75.0682	30.2989	pos	pos	0.61
19_0128	Validation	nd	neg	nd	neg	0	0	neg	na	0
19_0043	Training	neg	pos	pos	pos	70.3922	55.4195	pos	pos	0.15
19_0014	Validation	neg	pos	pos	pos	71.4852	59.9202	pos	pos	0.12
19_0146	Validation	neg	pos	pos	pos	79.1171	63.3318	pos	pos	0.47
19_0055	Training	pos	pos	nd	pos	18.7805	8.84316	pos	pos	0.02
19_0135	Validation	pos	pos	nd	pos	96.0918	89.7465	pos	pos	1.35
19_0136	Validation	nd	neg	nd	neg	0	0	neg	na	0
19_0137	Validation	pos	pos	nd	pos	87.3049	80	pos	pos	0.67
19_0067	Training	pos	pos	nd	pos	95.1439	87.1551	pos	pos	6.08
19_0070	Training	pos	pos	nd	pos	21.0896	8.48519	pos	pos	0.02
19_0138	Validation	neg	pos	neg	conflict	0	0	neg	neg	0
19_0079	Training	pos	pos	nd	pos	95.4325	90.4594	pos	pos	14.35
19_0141	Validation	pos	pos	nd	pos	12.0361	0	pos	pos	0.02
19_0143	Validation	nd	neg	neg	neg	0	0	neg	neg	0
19_0097	Training	pos	pos	pos	pos	1.18064	0	pos	pos	0
19_0144	Validation	pos	pos	nd	pos	29.8329	19.2062	pos	pos	0.06
19_0100	Training	pos	pos	nd	pos	42.3729	31.5483	pos	pos	0.06
19_0021	Validation	neg	pos	pos	pos	83.125	70.3143	pos	pos	0.17
19_0147	Validation	pos	pos	nd	pos	59.8837	49.4417	pos	pos	0.6
19_0149	Validation	nd	neg	nd	neg	0.07297	0	neg	na	0
19_0109	Training	pos	pos	nd	pos	41.2727	29.7987	pos	pos	0.11
19_0152	Validation	neg	nd	nd	nd	0.06203	0	neg	na	0.01
19_0153	Validation	pos	nd	nd	nd	96.7038	92.6659	pos	pos	1.54
19_0112	Training	pos	pos	nd	pos	44.426	26.2599	pos	pos	0.09
19_0155	Validation	neg	nd	nd	nd	0.06625	0	neg	na	0.01
19_0121	Training	pos	pos	nd	pos	52.081	37.5481	pos	pos	0.43
19_0156	Validation	neg	nd	nd	nd	0.29477	0	neg	na	0.02
19_0127	Training	pos	pos	nd	pos	56.2449	42.9287	pos	pos	0.26
19_0130	Training	pos	pos	nd	pos	12.9266	0	pos	pos	0.01
19_0159	Validation	neg	nd	nd	nd	0	0	neg	na	0
19_0160	Validation	pos	nd	nd	nd	66.6985	40.2404	pos	pos	0.51
19_0161	Validation	neg	nd	nd	nd	28.0189	10.1607	pos	na	0.01
19_0162	Validation	pos	nd	nd	nd	80.259	64.4556	pos	pos	1.05
19_0145	Training	pos	pos	nd	pos	64.5439	44.1633	pos	pos	0.33
P23C0	Validation	nd	nd	nd	nd	0.35211	0	neg	neg	0.01
19_0151	Training	pos	nd	nd	nd	92.3529	78.7986	pos	pos	0.19
P38C0	Validation	nd	nd	nd	nd	0.43732	0	neg	neg	0.03
P6C0	Validation	nd	nd	nd	nd	0.44577	0	neg	neg	0.02
P7C0	Validation	nd	nd	nd	nd	0.58708	0	neg	neg	0.02

## Sheet: Salmonella
Salmonella
StudyID	Set	culture	BDMax	BioFire	PCRsummary	NEW_VFDB_80th	Cmg	Composite	NEW_%Salm(Kraken)
14_0001	Validation	neg	nd	nd	nd	0.57982	neg	na	0.07
14_0002	Validation	neg	nd	nd	nd	0	neg	na	0
14_0003	Training	neg	nd	nd	nd	0.2736	neg	na	0.01
14_0004	Validation	neg	nd	nd	nd	0.07194	neg	na	0.01
14_0005	Training	pos	nd	nd	nd	100	pos	pos	0.03
14_0006	Validation	neg	nd	nd	nd	0.03799	neg	na	0.24
14_0007	Training	neg	nd	neg	neg	0.11891	neg	neg	0.01
14_0008	Validation	pos	nd	nd	nd	97.8921	pos	pos	6.81
15_0001	Validation	pos	nd	nd	nd	100	pos	pos	1.19
15_0002	Validation	neg	nd	nd	nd	0.24351	neg	na	0.25
15_0003	Validation	neg	nd	neg	neg	0	neg	neg	0
15_0004	Training	neg	nd	neg	neg	0	neg	neg	0.01
15_0005	Validation	pos	nd	neg	neg	0	neg	pos	0
15_0006	Validation	neg	nd	neg	neg	0	neg	neg	0
15_0007	Validation	neg	nd	neg	neg	0.0374	neg	neg	0.03
15_0008	Training	neg	nd	neg	neg	0	neg	neg	0
15_0009	Validation	neg	nd	neg	neg	0	neg	neg	0
15_0010	Validation	neg	nd	neg	neg	0	neg	neg	0.02
15_0011	Training	neg	nd	neg	neg	0.14859	neg	neg	0.03
15_0012	Validation	neg	nd	neg	neg	0	neg	neg	0
15_0013	Validation	neg	nd	neg	neg	0	neg	neg	0.01
15_0014	Training	neg	nd	neg	neg	2.88149	pos	neg	0.01
15_0015	Training	neg	nd	neg	neg	0.12175	neg	neg	0.04
15_0016	Validation	neg	nd	neg	neg	0.03817	neg	neg	0.19
15_0017	Validation	neg	nd	neg	neg	0	neg	neg	0
15_0018	Validation	neg	nd	neg	neg	0.03799	neg	neg	0
15_0019	Validation	neg	nd	neg	neg	0	neg	neg	0
15_0020	Training	neg	nd	neg	neg	0	neg	neg	0.01
15_0021	Validation	neg	nd	neg	neg	0	neg	neg	0
15_0022	Validation	neg	nd	neg	neg	0	neg	neg	0.02
15_0023	Training	neg	nd	neg	neg	0	neg	neg	0.01
15_0024	Validation	neg	nd	neg	neg	0	neg	neg	0.04
15_0025	Validation	neg	nd	neg	neg	0.66642	neg	neg	0.04
15_0026	Training	neg	nd	neg	neg	0	neg	neg	0
15_0027	Validation	neg	nd	neg	neg	0	neg	neg	0
15_0028	Validation	neg	nd	neg	neg	0.11372	neg	neg	0
15_0029	Validation	neg	nd	neg	neg	0.03971	neg	neg	0
15_0030	Validation	neg	nd	neg	neg	0	neg	neg	0
15_0031	Validation	neg	nd	neg	neg	0	neg	neg	0
15_0032	Training	neg	nd	neg	neg	0.41609	neg	neg	0.03
15_0033	Validation	neg	nd	neg	neg	0	neg	neg	0
15_0034	Training	neg	nd	neg	neg	0	neg	neg	0
15_0035	Validation	neg	nd	neg	neg	0	neg	neg	0.05
15_0036	Validation	neg	nd	neg	neg	0	neg	neg	0.03
15_0037	Validation	neg	nd	neg	neg	0	neg	neg	0
15_0038	Training	neg	nd	neg	neg	0	neg	neg	0
15_0039	Validation	neg	nd	nd	nd	0	neg	neg	0.01
15_0040	Validation	neg	nd	neg	neg	0	neg	neg	0.01
15_0041	Training	neg	nd	neg	neg	0	neg	neg	0.01
15_0042	Validation	neg	nd	neg	neg	0	neg	neg	0
15_0043	Validation	neg	nd	neg	neg	0	neg	neg	0.01
15_0044	Training	neg	nd	neg	neg	0	neg	neg	0
15_0045	Validation	neg	nd	neg	neg	1.25523	pos	neg	0.11
15_0046	Validation	neg	nd	neg	neg	0	neg	neg	0
15_0047	Validation	neg	nd	neg	neg	0.12175	neg	neg	0.02
15_0048	Validation	neg	nd	neg	neg	0	neg	neg	0
15_0049	Validation	neg	nd	neg	neg	0	neg	neg	0
15_0050	Training	neg	nd	neg	neg	0	neg	neg	0
15_0051	Training	pos	nd	nd	nd	60.042	pos	pos	0.08
15_0052	Validation	neg	nd	neg	neg	0.89955	neg	neg	0.01
15_0053	Training	neg	nd	neg	neg	0	neg	neg	0
15_0054	Validation	pos	nd	nd	nd	6.0177	pos	pos	0.01
15_0055	Validation	neg	nd	neg	neg	0	neg	neg	0.14
15_0056	Training	neg	nd	neg	neg	0.60852	neg	neg	0.03
15_0057	Validation	neg	nd	neg	neg	0	neg	neg	0.01
15_0058	Validation	neg	nd	neg	neg	0.12175	neg	neg	0.04
15_0059	Validation	neg	nd	neg	neg	0.49423	neg	neg	0.04
15_0060	Validation	neg	nd	neg	neg	0	neg	neg	0
15_0061	Validation	neg	nd	neg	neg	0	neg	neg	0
15_0062	Training	neg	nd	neg	neg	0.11107	neg	neg	0
15_0063	Validation	neg	nd	neg	neg	0	neg	neg	0
15_0064	Validation	neg	nd	neg	neg	0.03817	neg	neg	0
15_0065	Training	neg	nd	neg	neg	0	neg	neg	0
15_0066	Validation	neg	nd	neg	neg	0	neg	neg	0
15_0067	Validation	neg	nd	neg	neg	0	neg	neg	0.02
15_0068	Validation	neg	nd	neg	neg	0.03817	neg	neg	0.01
15_0069	Validation	neg	nd	neg	neg	0.18484	neg	neg	0.05
15_0070	Validation	neg	nd	neg	neg	0.40726	neg	neg	0
15_0071	Training	neg	nd	neg	neg	0.20862	neg	neg	0
15_0072	Validation	neg	nd	neg	neg	0.04121	neg	neg	0.17
15_0073	Validation	neg	nd	neg	neg	0	neg	neg	0
15_0074	Training	neg	nd	neg	neg	0	neg	neg	0
15_0075	Validation	neg	nd	neg	neg	0	neg	neg	0.01
15_0076	Validation	neg	nd	neg	neg	0	neg	neg	0
15_0077	Training	neg	nd	neg	neg	0	neg	neg	0
15_0078	Training	neg	nd	neg	neg	0.13643	neg	neg	0
15_0079	Training	neg	nd	neg	neg	0	neg	neg	0
15_0080	Validation	neg	nd	neg	neg	0	neg	neg	0
15_0081	Validation	neg	nd	neg	neg	0.07692	neg	neg	0
15_0082	Validation	neg	nd	neg	neg	0.03883	neg	neg	0
15_0083	Training	neg	nd	neg	neg	0	neg	neg	0
15_0084	Validation	neg	nd	neg	neg	0	neg	neg	0
15_0085	Validation	neg	nd	neg	neg	0	neg	neg	0
15_0086	Training	neg	nd	neg	neg	0	neg	neg	0
15_0087	Validation	neg	nd	neg	neg	0	neg	neg	0.02
15_0088	Validation	neg	nd	neg	neg	0.03799	neg	neg	0.05
17_0001	Training	neg	neg	neg	neg	0.11891	neg	neg	0.03
17_0002	Validation	neg	neg	neg	neg	0	neg	neg	0
17_0003	Validation	neg	neg	neg	neg	0	neg	neg	0
17_0004	Training	neg	neg	neg	neg	0	neg	neg	0
17_0005	Validation	neg	neg	neg	neg	0.15408	neg	neg	0.03
17_0006	Validation	neg	neg	neg	neg	0.03799	neg	neg	0.02
17_0007	Training	neg	neg	neg	neg	0.03799	neg	neg	0.01
17_0008	Validation	neg	neg	neg	neg	0	neg	neg	0
17_0009	Validation	neg	pos	neg	conflict	0	neg	neg	0
17_0010	Training	neg	pos	pos	pos	0	neg	pos	0
17_0011	Validation	neg	neg	neg	neg	0	neg	neg	0
17_0012	Validation	neg	neg	neg	neg	0.1218	neg	neg	0.01
17_0013	Training	neg	neg	neg	neg	0	neg	neg	0.01
17_0014	Validation	neg	neg	nd	neg	0	neg	neg	0.06
17_0015	Validation	neg	neg	neg	neg	0	neg	neg	0
17_0016	Validation	neg	neg	neg	neg	0	neg	neg	0
17_0017	Validation	neg	neg	neg	neg	0.1218	neg	neg	0.01
17_0018	Validation	neg	neg	neg	neg	0	neg	neg	0
17_0019	Validation	neg	neg	neg	neg	0	neg	neg	0.05
17_0020	Validation	pos	neg	neg	neg	0.03883	neg	pos	0
17_0021	Validation	neg	pos	pos	pos	0	neg	pos	0
17_0022	Training	neg	neg	neg	neg	0	neg	neg	0
17_0023	Validation	neg	neg	neg	neg	0	neg	neg	0
17_0024	Training	neg	neg	neg	neg	0	neg	neg	0
17_0025	Validation	neg	nd	nd	nd	0	neg	na	0.03
17_0026	Validation	pos	nd	nd	nd	77.8218	pos	pos	0.03
17_0027	Validation	neg	nd	nd	nd	0	neg	na	0
17_0028	Training	neg	nd	nd	nd	0.15408	neg	na	0.04
17_0029	Validation	pos	nd	nd	nd	100	pos	pos	13.59
17_0030	Validation	pos	nd	nd	nd	94.9248	pos	pos	0.03
17_0031	Training	neg	nd	nd	nd	0	neg	na	0
17_0032	Validation	pos	nd	nd	nd	92.604	pos	pos	0.57
17_0033	Training	pos	nd	pos	pos	0.03817	neg	pos	0
17_0034	Validation	pos	nd	nd	nd	100	pos	pos	0.11
17_0035	Training	pos	nd	nd	nd	77.2595	pos	pos	0.01
17_0036	Validation	pos	nd	nd	nd	79.9213	pos	pos	0.01
18_0001	Training	pos	nd	nd	nd	98.2605	pos	pos	0.03
18_0002	Validation	pos	nd	nd	nd	100	pos	pos	0.41
18_0003	Validation	pos	nd	nd	nd	100	pos	pos	0.06
18_0004	Training	neg	nd	neg	neg	0.74257	neg	neg	0.01
18_0005	Validation	neg	nd	nd	nd	0	neg	na	0.2
18_0006	Validation	neg	nd	nd	nd	0.83955	neg	na	0.02
18_0007	Training	neg	nd	nd	nd	0.03744	neg	na	0.01
18_0008	Validation	pos	nd	nd	nd	77.7051	pos	pos	0.01
18_0009	Validation	pos	nd	nd	nd	58.7444	pos	pos	0.07
19_0001	Validation	nd	neg	nd	neg	0	neg	na	0.02
19_0002	Training	pos	pos	nd	pos	100	pos	pos	3.43
19_0003	Validation	nd	neg	nd	neg	0	neg	na	0
19_0004	Training	nd	neg	nd	neg	0	neg	na	0
19_0005	Validation	nd	neg	nd	neg	0	neg	na	0
19_0006	Validation	nd	neg	nd	neg	0.12175	neg	na	0.03
19_0007	Training	nd	neg	nd	neg	0	neg	na	0
19_0008	Validation	neg	ind	neg	conflict	0	neg	neg	0
19_0009	Validation	nd	neg	neg	neg	0	neg	neg	0
19_0010	Validation	nd	neg	neg	neg	0.13643	neg	neg	0
19_0011	Validation	nd	neg	neg	neg	0.03799	neg	neg	0.01
19_0012	Validation	nd	neg	nd	neg	0.12175	neg	na	0.01
19_0013	Training	nd	neg	neg	neg	0	neg	neg	0
19_0014	Validation	nd	neg	neg	neg	0.03799	neg	neg	0.02
19_0015	Validation	nd	neg	nd	neg	0.14613	neg	na	0
19_0016	Training	nd	neg	neg	neg	0.03799	neg	neg	0
19_0017	Validation	nd	neg	nd	neg	0.15408	neg	na	0.02
19_0018	Validation	nd	neg	nd	neg	0	neg	na	0
19_0019	Training	pos	pos	nd	pos	79.8223	pos	pos	0.03
19_0020	Training	nd	neg	nd	neg	0.03799	neg	na	0.33
19_0021	Validation	pos	pos	pos	pos	3.0426	pos	pos	0.04
19_0022	Training	nd	neg	neg	neg	0	neg	neg	0
19_0023	Validation	pos	pos	nd	pos	20.2847	pos	pos	0.13
19_0024	Validation	nd	neg	neg	neg	0	neg	neg	0
19_0025	Training	nd	neg	nd	neg	0	neg	na	0
19_0026	Validation	nd	neg	nd	neg	0	neg	na	0
19_0027	Validation	nd	neg	nd	neg	0.15408	neg	na	0.05
19_0028	Validation	nd	neg	nd	neg	0.03799	neg	na	0.01
19_0029	Validation	pos	pos	nd	pos	48.1195	pos	pos	0.01
19_0030	Validation	nd	neg	nd	neg	0.03799	neg	na	0.01
19_0031	Validation	nd	neg	nd	neg	0.03799	neg	na	0.03
19_0032	Validation	pos	pos	nd	pos	3.81443	pos	pos	0.02
19_0033	Validation	pos	pos	nd	pos	22.6688	pos	pos	0.01
19_0034	Training	nd	neg	neg	neg	0.04397	neg	neg	0.01
19_0035	Validation	nd	neg	neg	neg	0	neg	neg	0
19_0036	Validation	nd	neg	neg	neg	0	neg	neg	0
19_0037	Training	neg	pos	neg	conflict	0	neg	neg	0
19_0038	Validation	nd	neg	nd	neg	0.12175	neg	na	0
19_0039	Validation	nd	neg	nd	neg	0.15408	neg	na	0
19_0040	Training	nd	neg	neg	neg	0.19175	neg	neg	0.02
19_0041	Validation	nd	neg	nd	neg	0.03799	neg	na	0.02
19_0042	Validation	nd	neg	nd	neg	0	neg	na	0.02
19_0043	Training	nd	neg	neg	neg	0	neg	neg	0
19_0044	Validation	nd	neg	nd	neg	0	neg	na	0.02
19_0045	Training	nd	neg	neg	neg	0	neg	neg	0
19_0046	Training	nd	neg	nd	neg	0.11596	neg	na	0.1
19_0047	Validation	nd	neg	neg	neg	0	neg	neg	0
19_0048	Validation	nd	neg	nd	neg	0.15408	neg	na	0.01
19_0049	Training	nd	neg	neg	neg	0	neg	neg	0.01
19_0050	Validation	nd	neg	neg	neg	0	neg	neg	0
19_0051	Validation	nd	neg	neg	neg	0.49423	neg	neg	0
19_0052	Training	nd	neg	neg	neg	0.79929	neg	neg	0.03
19_0053	TRAINING	pos	ind	pos	conflict	1.08683	pos	pos	0
19_0054	Validation	nd	neg	nd	neg	0	neg	na	0
19_0055	Training	nd	neg	nd	neg	0	neg	na	0.03
19_0056	Training	pos	pos	nd	pos	0	neg	pos	0
19_0057	Validation	nd	neg	neg	neg	0	neg	neg	0
19_0058	Validation	nd	neg	neg	neg	0	neg	neg	0
19_0059	Validation	nd	neg	neg	neg	0	neg	neg	0
19_0060	Validation	nd	neg	nd	neg	0	neg	na	0
19_0061	Training	pos	pos	nd	pos	79.5811	pos	pos	0.11
19_0062	Validation	pos	pos	nd	pos	91.9762	pos	pos	0.59
19_0063	Validation	nd	neg	nd	neg	0	neg	na	0
19_0064	Validation	nd	neg	nd	neg	0	neg	na	0.02
19_0065	Validation	pos	pos	nd	pos	44.1348	pos	pos	0.01
19_0066	Validation	pos	pos	nd	pos	90.007	pos	pos	0.03
19_0067	Training	nd	neg	nd	neg	0.03817	neg	na	0
19_0068	Validation	nd	neg	nd	neg	0	neg	na	0.18
19_0069	Validation	nd	neg	nd	neg	0	neg	na	0
19_0070	Training	nd	neg	nd	neg	0	neg	na	0
19_0071	Training	nd	neg	nd	neg	0	neg	na	0
19_0072	Validation	nd	neg	nd	neg	0.13844	neg	na	0.01
19_0073	Training	nd	neg	nd	neg	0.1548	neg	na	0
19_0074	Validation	nd	neg	nd	neg	0	neg	na	0
19_0075	Validation	nd	neg	nd	neg	0	neg	na	0
19_0076	Training	nd	neg	nd	neg	0	neg	na	0
19_0077	Validation	nd	neg	neg	neg	0	neg	neg	0
19_0078	Validation	nd	neg	neg	neg	0.96931	neg	neg	0.03
19_0079	Training	nd	neg	nd	neg	0.2461	neg	na	0.02
19_0080	Training	nd	neg	neg	neg	0	neg	na	0
19_0081	Validation	nd	neg	nd	neg	0.27688	neg	na	0.04
19_0082	Training	nd	neg	neg	neg	0	neg	neg	0
19_0083	Validation	nd	neg	nd	neg	0	neg	na	0
19_0084	Validation	nd	neg	nd	neg	0	neg	na	0
19_0085	Training	nd	neg	nd	neg	0	neg	na	0
19_0086	Validation	nd	neg	nd	neg	0	neg	na	0.02
19_0087	Validation	nd	neg	nd	neg	0.13844	neg	na	0.01
19_0088	Training	neg	ind	neg	conflict	0	neg	neg	0.01
19_0089	Training	nd	neg	nd	neg	0	neg	na	0
19_0090	Validation	nd	neg	neg	neg	0	neg	neg	0
19_0091	Training	nd	neg	neg	neg	0	neg	neg	0
19_0092	Validation	nd	neg	neg	neg	0	neg	neg	0
19_0093	Training	nd	neg	nd	neg	0	neg	na	0
19_0094	Validation	nd	neg	nd	neg	0	neg	na	0
19_0095	Validation	nd	neg	nd	neg	0	neg	na	0
19_0096	Validation	pos	pos	nd	pos	95.8967	pos	pos	0.48
19_0097	Training	nd	neg	neg	neg	0	neg	neg	0.03
19_0098	Validation	nd	neg	nd	neg	0	neg	na	0
19_0099	Validation	nd	neg	neg	neg	0	neg	neg	0.01
19_0100	Training	nd	neg	nd	neg	0	neg	na	0
19_0101	Validation	nd	neg	nd	neg	0	neg	na	0
19_0102	Validation	nd	neg	neg	neg	0	neg	neg	0
19_0103	Training	nd	neg	neg	neg	0	neg	neg	0
19_0104	Validation	nd	neg	nd	neg	0	neg	na	1.72
19_0105	Validation	nd	neg	neg	neg	0	neg	neg	0
19_0106	Training	nd	neg	neg	neg	0.15408	neg	neg	0.02
19_0107	Validation	nd	neg	nd	neg	0	neg	na	0
19_0108	Validation	pos	pos	nd	pos	0.15408	neg	pos	0.03
19_0109	Training	nd	neg	nd	neg	0	neg	na	0
19_0110	Validation	nd	neg	nd	neg	0	neg	na	0
19_0111	Validation	nd	neg	nd	neg	0.03799	neg	na	0.01
19_0112	Training	nd	neg	nd	neg	0.15408	neg	na	0.01
19_0113	Validation	nd	neg	neg	neg	0	neg	neg	0
19_0114	Validation	neg	ind	neg	conflict	0	neg	neg	0
19_0115	Training	nd	neg	neg	neg	0.12175	neg	neg	0
19_0116	Validation	nd	neg	nd	neg	0	neg	na	0
19_0117	Training	nd	neg	neg	neg	0	neg	neg	0
19_0118	Validation	nd	neg	neg	neg	0.13838	neg	neg	0
19_0119	Validation	nd	neg	nd	neg	0	neg	na	0
19_0120	Validation	nd	neg	nd	neg	0	neg	na	0
19_0121	Training	nd	neg	nd	neg	0	neg	na	0
19_0122	Validation	nd	neg	neg	neg	0	neg	neg	0
19_0123	Validation	nd	neg	neg	neg	0.03817	neg	neg	0.01
19_0124	Validation	nd	neg	nd	neg	0	neg	na	0
19_0125	Training	nd	neg	nd	neg	0.11891	neg	na	0.06
19_0126	Validation	nd	neg	nd	neg	0	neg	na	0
19_0127	Training	nd	neg	nd	neg	0	neg	na	0
19_0128	Validation	nd	neg	nd	neg	0.44978	neg	na	0.01
19_0129	Validation	nd	neg	neg	neg	0.15408	neg	neg	0
19_0130	Training	nd	neg	nd	neg	0.42135	neg	na	0.02
19_0131	Validation	nd	neg	neg	neg	0	neg	neg	0
19_0132	Validation	nd	neg	neg	neg	0	neg	neg	0
19_0133	Training	nd	neg	nd	neg	0.37129	neg	na	0.02
19_0134	Training	nd	neg	nd	neg	0	neg	na	0
19_0135	Validation	nd	neg	nd	neg	0.29718	neg	na	0.01
19_0136	Validation	pos	pos	nd	pos	93.4253	pos	pos	3.59
19_0137	Validation	nd	neg	nd	neg	0	neg	na	0.1
19_0138	Validation	nd	neg	neg	neg	0	neg	neg	0
19_0139	Training	pos	pos	nd	pos	2.15716	pos	pos	0
19_0140	Training	nd	neg	neg	neg	0	neg	neg	0
19_0141	Validation	nd	neg	nd	neg	0.07599	neg	na	0.01
19_0142	Training	nd	neg	neg	neg	0.33223	neg	neg	0.07
19_0143	Validation	nd	neg	neg	neg	0.1548	neg	neg	0.09
19_0144	Validation	nd	neg	nd	neg	0	neg	na	0.01
19_0145	Training	nd	neg	nd	neg	0	neg	na	0
19_0146	Validation	nd	neg	neg	neg	0	neg	neg	0
19_0147	Validation	nd	neg	nd	neg	0	neg	na	0.03
19_0148	Training	nd	neg	nd	neg	0	neg	na	0
19_0149	Validation	pos	pos	nd	pos	93.3014	pos	pos	0.62
19_0150	Training	nd	neg	nd	neg	0	neg	na	0
19_0151	Training	neg	nd	nd	nd	0.07405	neg	na	0
19_0152	Validation	pos	nd	nd	nd	100	pos	pos	0.16
19_0153	Validation	neg	nd	nd	nd	0	neg	na	0
19_0154	Training	pos	nd	nd	nd	97.3267	pos	pos	0.15
19_0155	Validation	pos	nd	nd	nd	100	pos	pos	0.05
19_0156	Validation	pos	nd	nd	nd	80.1233	pos	pos	0.03
19_0157	Training	neg	nd	nd	nd	0.11107	neg	na	0.01
19_0158	Training	neg	nd	nd	nd	0	neg	na	0
19_0159	Validation	neg	nd	nd	nd	0.0374	neg	na	0.03
19_0160	Validation	neg	nd	nd	nd	0	neg	na	0
19_0161	Validation	neg	nd	nd	nd	0	neg	na	0
19_0162	Validation	neg	nd	nd	nd	0.15408	neg	na	0.02
19_0163	Training	neg	nd	nd	nd	0	neg	na	0
P23C0	Validation	nd	nd	nd	nd	0	neg	neg	0.03
P25C0	Training	nd	nd	nd	nd	0	neg	neg	0.06
P38C0	Validation	nd	nd	nd	nd	0	neg	neg	0.06
P6C0	Validation	nd	nd	nd	nd	0	neg	neg	0.03
P7C0	Validation	nd	nd	nd	nd	0	neg	neg	0.03
P8C0	Training	nd	nd	nd	nd	0	neg	neg	0.08

## Sheet: Shigella
Shigella
StudyID	Set	culture	BDMax	BioFire	PCRsummary	NEW_VFDB_180th	CMg	composite	NEW%Shig(Kraken)
14_0001	Validation	neg	nd	nd	nd	0	neg	na	0.07
14_0002	Validation	neg	nd	nd	nd	0	neg	na	0
14_0003	Training	neg	nd	nd	nd	0	neg	na	0.01
14_0004	Validation	neg	nd	nd	nd	0	neg	na	0.01
14_0005	Training	neg	nd	nd	nd	0.10905	neg	na	0
14_0006	Validation	pos	nd	nd	nd	94.5262	pos	pos	1.06
17_0001	Training	neg	neg	neg	neg	0	neg	neg	0.03
14_0008	Validation	neg	nd	nd	nd	0	neg	na	0
15_0001	Validation	neg	nd	nd	nd	0	neg	na	0.02
15_0002	Validation	pos	nd	nd	nd	96.3645	pos	pos	2.96
17_0002	Validation	neg	neg	neg	neg	0	neg	neg	0
17_0003	Validation	neg	neg	neg	neg	0	neg	neg	0
17_0004	Training	neg	neg	neg	neg	0	neg	neg	0
17_0005	Validation	neg	neg	neg	neg	0	neg	neg	0.03
17_0006	Validation	neg	neg	neg	neg	0	neg	neg	0.03
17_0007	Training	neg	neg	neg	neg	0	neg	neg	0.01
17_0008	Validation	neg	neg	neg	neg	0	neg	neg	0
17_0009	Validation	neg	neg	neg	neg	0	neg	neg	0
17_0010	Training	neg	neg	neg	neg	0	neg	neg	0
17_0011	Validation	neg	neg	neg	neg	0	neg	neg	0
17_0012	Validation	neg	pos	pos	pos	22.5769	pos	pos	0.01
17_0013	Training	neg	neg	neg	neg	0	neg	neg	0.01
17_0014	Validation	neg	neg	nd	neg	0	neg	neg	0.03
17_0015	Validation	neg	neg	neg	neg	0	neg	neg	0
17_0016	Validation	neg	neg	neg	neg	0	neg	neg	0
17_0017	Validation	neg	pos	pos	pos	0	neg	pos	0.01
17_0018	Validation	neg	pos	pos	pos	0	neg	pos	0
17_0019	Validation	neg	neg	neg	neg	0	neg	neg	0.01
17_0020	Validation	neg	neg	neg	neg	0	neg	neg	0
17_0021	Validation	neg	neg	neg	neg	0	neg	neg	0
17_0022	Training	neg	pos	pos	pos	0	neg	pos	0
17_0023	Validation	neg	pos	pos	pos	0	neg	pos	0
17_0024	Training	neg	neg	neg	neg	0	neg	neg	0
19_0001	Validation	nd	neg	nd	neg	0	neg	na	0.03
19_0002	Training	nd	neg	nd	neg	0	neg	na	0
19_0003	Validation	nd	neg	nd	neg	0	neg	na	0
19_0004	Training	pos	pos	nd	pos	0	neg	pos	0
19_0005	Validation	pos	pos	nd	pos	1.48331	pos	pos	0.01
19_0006	Validation	nd	neg	nd	neg	0	neg	na	0
19_0007	Training	nd	neg	nd	neg	0	neg	na	0
19_0009	Validation	neg	pos	pos	pos	0	neg	pos	0
19_0011	Validation	nd	neg	neg	neg	0	neg	neg	0.01
19_0012	Validation	nd	neg	nd	neg	0	neg	na	0.01
19_0013	Training	nd	neg	neg	neg	0	neg	neg	0
19_0014	Validation	nd	neg	neg	neg	0	neg	neg	0
19_0015	Validation	nd	neg	nd	neg	0	neg	na	0
15_0039	Validation	neg	nd	nd	nd	0	neg	na	0.01
19_0016	Training	nd	neg	neg	neg	0	neg	neg	0.01
19_0017	Validation	nd	neg	nd	neg	0	neg	na	0.04
19_0018	Validation	pos	pos	nd	pos	25.1008	pos	pos	0
19_0019	Training	nd	neg	nd	neg	0	neg	na	0
19_0020	Training	nd	neg	nd	neg	0	neg	na	0.03
19_0021	Validation	nd	neg	neg	neg	0	neg	neg	0.02
19_0022	Training	nd	neg	neg	neg	0	neg	neg	0
19_0023	Validation	nd	neg	nd	neg	0	neg	na	0.05
19_0024	Validation	nd	neg	neg	neg	0	neg	neg	0
19_0025	Training	nd	neg	nd	neg	0	neg	na	0
19_0026	Validation	nd	neg	nd	neg	0	neg	na	0
15_0051	Training	neg	nd	nd	nd	0	neg	na	0.04
19_0027	Validation	nd	neg	nd	neg	0	neg	na	0.04
19_0028	Validation	nd	neg	nd	neg	0	neg	na	0
15_0054	Validation	neg	nd	nd	nd	0	neg	na	0
19_0029	Validation	nd	neg	nd	neg	0	neg	na	0.02
19_0030	Validation	nd	neg	nd	neg	0	neg	na	0
19_0031	Validation	nd	neg	nd	neg	0	neg	na	0
19_0032	Validation	nd	neg	nd	neg	0	neg	na	0.03
19_0033	Validation	nd	neg	nd	neg	0	neg	na	0.01
19_0034	Training	neg	pos	pos	pos	0	neg	pos	0.01
19_0035	Validation	nd	neg	neg	neg	0	neg	neg	0
19_0036	Validation	nd	neg	neg	neg	0	neg	neg	0
19_0037	Training	nd	neg	neg	neg	0	neg	neg	0
19_0038	Validation	nd	neg	nd	neg	0	neg	na	0
19_0039	Validation	nd	neg	nd	neg	0	neg	na	0
19_0040	Training	nd	neg	neg	neg	0	neg	neg	0.01
19_0041	Validation	nd	neg	nd	neg	0	neg	na	0.05
19_0042	Validation	nd	neg	nd	neg	0	neg	na	0.01
19_0043	Training	nd	neg	neg	neg	0	neg	neg	0
19_0044	Validation	nd	neg	nd	neg	0	neg	na	0.02
19_0045	Training	nd	neg	neg	neg	0	neg	neg	0
19_0046	Training	nd	neg	nd	neg	0	neg	na	0.11
19_0047	Validation	nd	neg	neg	neg	0	neg	neg	0
19_0048	Validation	nd	neg	nd	neg	0	neg	na	0.01
19_0049	Training	nd	neg	neg	neg	0	neg	neg	0.01
19_0050	Validation	nd	neg	neg	neg	0	neg	neg	0
19_0051	Validation	nd	neg	neg	neg	0	neg	neg	0
19_0052	Training	nd	neg	neg	neg	0	neg	neg	0.01
19_0054	Validation	nd	neg	nd	neg	0	neg	na	0
19_0055	Training	nd	neg	nd	neg	0	neg	na	0
19_0056	Training	nd	neg	nd	neg	0	neg	na	0
19_0057	Validation	nd	neg	neg	neg	0	neg	neg	0
19_0058	Validation	nd	neg	neg	neg	0	neg	neg	0
19_0059	Validation	nd	neg	neg	neg	0	neg	neg	0
19_0060	Validation	nd	neg	nd	neg	0	neg	na	0
19_0061	Training	nd	neg	nd	neg	0	neg	na	0
19_0062	Validation	nd	neg	nd	neg	0	neg	na	0
19_0063	Validation	nd	neg	nd	neg	0	neg	na	0
19_0064	Validation	nd	neg	nd	neg	0	neg	na	0.02
19_0065	Validation	nd	neg	nd	neg	0	neg	na	0
19_0066	Validation	nd	neg	nd	neg	0	neg	na	0
19_0067	Training	nd	neg	nd	neg	0	neg	na	0.01
19_0068	Validation	pos	pos	nd	pos	93.5096	pos	pos	2.8
19_0069	Validation	nd	neg	nd	neg	0	neg	na	0
19_0070	Training	nd	neg	nd	neg	0	neg	na	0
19_0071	Training	nd	neg	nd	neg	0	neg	na	0
19_0072	Validation	nd	neg	nd	neg	0	neg	na	0.01
19_0073	Training	nd	neg	nd	neg	0	neg	na	0.01
19_0074	Validation	nd	neg	nd	neg	0	neg	na	0
19_0075	Validation	nd	neg	nd	neg	0	neg	na	0
19_0076	Training	nd	neg	nd	neg	0	neg	na	0
19_0077	Validation	nd	neg	neg	neg	0	neg	neg	0
19_0078	Validation	nd	neg	neg	neg	0	neg	neg	0.04
19_0079	Training	nd	neg	nd	neg	0	neg	na	0.02
19_0080	Training	nd	neg	neg	neg	0	neg	neg	0
19_0081	Validation	nd	neg	nd	neg	0	neg	na	0.04
19_0082	Training	nd	neg	neg	neg	0	neg	neg	0
19_0083	Validation	nd	neg	nd	neg	0	neg	na	0
19_0084	Validation	nd	neg	nd	neg	0	neg	na	0
19_0085	Training	nd	neg	nd	neg	0	neg	na	0
19_0086	Validation	nd	neg	nd	neg	0	neg	na	0.02
19_0087	Validation	nd	neg	nd	neg	0	neg	na	0.01
17_0025	Validation	neg	nd	nd	nd	0	neg	na	0.07
17_0026	Validation	neg	nd	nd	nd	0	neg	na	0
17_0027	Validation	neg	nd	nd	nd	0	neg	na	0.01
17_0028	Training	neg	nd	nd	nd	0	neg	na	0.03
17_0029	Validation	neg	nd	nd	nd	0	neg	na	0
17_0030	Validation	neg	nd	nd	nd	0	neg	na	0
17_0031	Training	neg	nd	nd	nd	0	neg	na	0
17_0032	Validation	neg	nd	nd	nd	0	neg	na	0.05
19_0089	Training	nd	neg	nd	neg	0	neg	na	0
17_0034	Validation	neg	nd	nd	nd	0	neg	na	0.04
17_0035	Training	neg	nd	nd	nd	0	neg	na	0
17_0036	Validation	neg	nd	nd	nd	0	neg	na	0.01
18_0001	Training	neg	nd	nd	nd	0	neg	na	0
18_0002	Validation	neg	nd	nd	nd	0	neg	na	0.02
18_0003	Validation	neg	nd	nd	nd	0	neg	na	0
19_0090	Validation	nd	neg	neg	neg	0	neg	neg	0
18_0005	Validation	neg	nd	nd	nd	0	neg	na	0.01
18_0006	Validation	neg	nd	nd	nd	0	neg	na	0.02
18_0007	Training	neg	nd	nd	nd	0	neg	na	0.01
18_0008	Validation	neg	nd	nd	nd	0	neg	na	0.01
18_0009	Validation	neg	nd	nd	nd	0	neg	na	0
19_0091	Training	neg	pos	pos	pos	58.3689	pos	pos	0.01
19_0092	Validation	nd	neg	neg	neg	0	neg	neg	0
19_0093	Training	nd	neg	nd	neg	0	neg	na	0
19_0094	Validation	nd	neg	nd	neg	0	neg	na	0
19_0095	Validation	nd	neg	nd	neg	0	neg	na	0
19_0096	Validation	nd	neg	nd	neg	0	neg	na	0
19_0097	Training	nd	neg	neg	neg	0	neg	neg	0.09
19_0008	Validation	neg	ind	neg	conflict	0	neg	neg	0
19_0098	Validation	nd	neg	nd	neg	0	neg	na	0
19_0010	Validation	neg	pos	neg	conflict	0	neg	neg	0
19_0100	Training	nd	neg	nd	neg	0	neg	na	0
19_0101	Validation	nd	neg	nd	neg	0	neg	na	0
19_0102	Validation	nd	neg	neg	neg	0	neg	neg	0
19_0103	Training	nd	neg	neg	neg	0	neg	neg	0
19_0104	Validation	nd	neg	nd	neg	0	neg	na	0.08
19_0105	Validation	nd	neg	neg	neg	0	neg	neg	0
19_0106	Training	nd	neg	neg	neg	0	neg	neg	0.01
19_0107	Validation	nd	neg	nd	neg	0	neg	na	0
19_0108	Validation	nd	neg	nd	neg	0	neg	na	0
19_0109	Training	nd	neg	nd	neg	0	neg	na	0
19_0110	Validation	nd	neg	nd	neg	0	neg	na	0
19_0111	Validation	nd	neg	nd	neg	0	neg	na	0.01
19_0112	Training	nd	neg	nd	neg	0	neg	na	0.01
19_0113	Validation	nd	neg	neg	neg	0	neg	neg	0
19_0116	Validation	nd	neg	nd	neg	0	neg	na	0
19_0117	Training	nd	neg	neg	neg	0	neg	neg	0
19_0118	Validation	nd	neg	neg	neg	0	neg	neg	0.01
19_0119	Validation	nd	neg	nd	neg	0	neg	na	0.01
19_0120	Validation	nd	neg	nd	neg	0	neg	na	0
19_0121	Training	nd	neg	nd	neg	0	neg	na	0
19_0122	Validation	neg	pos	pos	pos	0	neg	pos	0
19_0123	Validation	nd	neg	neg	neg	0	neg	neg	0.01
19_0124	Validation	nd	neg	nd	neg	0	neg	na	0
19_0125	Training	nd	neg	nd	neg	0	neg	na	0.09
19_0126	Validation	nd	neg	nd	neg	0	neg	na	0
19_0127	Training	nd	neg	nd	neg	0	neg	na	0
19_0128	Validation	nd	neg	nd	neg	0	neg	na	0
19_0129	Validation	nd	neg	neg	neg	0	neg	neg	0
19_0130	Training	nd	neg	nd	neg	0	neg	na	0.05
19_0131	Validation	nd	neg	neg	neg	0	neg	neg	0
19_0132	Validation	nd	neg	neg	neg	0	neg	neg	0.01
19_0133	Training	nd	neg	nd	neg	0	neg	na	0.01
19_0134	Training	nd	neg	nd	neg	0	neg	na	0
19_0135	Validation	nd	neg	nd	neg	0	neg	na	0.01
19_0136	Validation	nd	neg	nd	neg	0	neg	na	0.05
19_0137	Validation	nd	neg	nd	neg	0	neg	na	0.01
19_0138	Validation	nd	neg	neg	neg	0	neg	neg	0
19_0139	Training	nd	neg	nd	neg	0	neg	na	0
19_0140	Training	neg	pos	pos	pos	1.36095	pos	pos	0
19_0141	Validation	nd	neg	nd	neg	0	neg	na	0.01
19_0142	Training	pos	pos	pos	pos	36.403	pos	pos	0.17
19_0143	Validation	neg	pos	pos	pos	11.3396	pos	pos	0.17
19_0053	TRAINING	neg	ind	neg	conflict	0	neg	neg	0
19_0144	Validation	nd	neg	nd	neg	0	neg	na	0.01
19_0145	Training	nd	neg	nd	neg	0	neg	na	0
19_0146	Validation	nd	neg	neg	neg	0	neg	neg	0
19_0147	Validation	nd	neg	nd	neg	0	neg	na	0.03
19_0148	Training	nd	neg	nd	neg	0	neg	na	0
19_0149	Validation	nd	neg	nd	neg	0	neg	na	0.03
19_0150	Training	nd	neg	nd	neg	0	neg	na	0
14_0007	Training	neg	nd	neg	neg	0	neg	neg	0
17_0033	Training	neg	nd	neg	neg	0	neg	neg	0
18_0004	Training	neg	nd	neg	neg	0.0261	neg	neg	0
15_0003	Validation	neg	nd	neg	neg	0	neg	neg	0
15_0004	Training	neg	nd	neg	neg	0	neg	neg	0
15_0005	Validation	neg	nd	neg	neg	0	neg	neg	0
15_0006	Validation	neg	nd	neg	neg	0	neg	neg	0
15_0007	Validation	neg	nd	neg	neg	0	neg	neg	0.03
15_0008	Training	neg	nd	neg	neg	0	neg	neg	0
15_0009	Validation	neg	nd	neg	neg	0	neg	neg	0
15_0010	Validation	neg	nd	neg	neg	0	neg	neg	0.01
15_0011	Training	neg	nd	neg	neg	0	neg	neg	0.05
15_0012	Validation	neg	nd	neg	neg	0	neg	neg	0
15_0013	Validation	neg	nd	neg	neg	0	neg	neg	0
15_0014	Training	neg	nd	neg	neg	0	neg	neg	0
15_0015	Training	neg	nd	neg	neg	0	neg	neg	0.04
15_0016	Validation	neg	nd	neg	neg	0	neg	neg	0.04
15_0017	Validation	neg	nd	neg	neg	0	neg	neg	0
15_0018	Validation	neg	nd	neg	neg	0	neg	neg	0.02
15_0019	Validation	neg	nd	neg	neg	0	neg	neg	0
15_0020	Training	neg	nd	neg	neg	0	neg	neg	0.01
15_0021	Validation	neg	nd	neg	neg	0	neg	neg	0
15_0022	Validation	neg	nd	neg	neg	0	neg	neg	0.01
15_0023	Training	neg	nd	neg	neg	0	neg	neg	0.04
15_0024	Validation	neg	nd	neg	neg	0	neg	neg	0
15_0025	Validation	neg	nd	neg	neg	0	neg	neg	0.01
15_0026	Training	neg	nd	neg	neg	0	neg	neg	0
19_0088	Training	neg	ind	neg	conflict	0	neg	neg	0
15_0027	Validation	neg	nd	neg	neg	0	neg	neg	0
15_0028	Validation	neg	nd	neg	neg	0	neg	neg	0
15_0029	Validation	neg	nd	neg	neg	0	neg	neg	0
15_0030	Validation	neg	nd	neg	neg	0	neg	neg	0
15_0031	Validation	neg	nd	neg	neg	0	neg	neg	0
15_0032	Training	neg	nd	neg	neg	0	neg	neg	0.05
15_0033	Validation	neg	nd	neg	neg	0	neg	neg	0
15_0034	Training	neg	nd	neg	neg	0	neg	neg	0
15_0035	Validation	neg	nd	neg	neg	0	neg	neg	0.06
15_0036	Validation	neg	nd	neg	neg	0	neg	neg	0.07
19_0099	Validation	neg	pos	neg	conflict	0	neg	neg	0.01
15_0037	Validation	neg	nd	neg	neg	0	neg	neg	0
15_0038	Training	neg	nd	neg	neg	0	neg	neg	0
15_0040	Validation	neg	nd	neg	neg	0	neg	neg	0.01
15_0041	Training	neg	nd	neg	neg	0	neg	neg	0.04
15_0042	Validation	neg	nd	neg	neg	0	neg	neg	0
15_0043	Validation	neg	nd	neg	neg	0	neg	neg	0.01
15_0044	Training	neg	nd	neg	neg	0	neg	neg	0
15_0045	Validation	neg	nd	neg	neg	0	neg	neg	0.06
15_0046	Validation	neg	nd	neg	neg	0	neg	neg	0
15_0047	Validation	neg	nd	pos	pos	28.8668	pos	na	0.04
15_0048	Validation	neg	nd	neg	neg	0	neg	neg	0
15_0049	Validation	neg	nd	neg	neg	0	neg	neg	0
15_0050	Training	neg	nd	neg	neg	0	neg	neg	0
15_0052	Validation	neg	nd	neg	neg	0	neg	neg	0
19_0114	Validation	neg	ind	neg	conflict	0	neg	neg	0
19_0115	Training	neg	pos	neg	conflict	0	neg	neg	0
15_0053	Training	neg	nd	neg	neg	0	neg	neg	0
15_0055	Validation	neg	nd	neg	neg	0	neg	neg	0
15_0056	Training	neg	nd	neg	neg	0	neg	neg	0
15_0057	Validation	neg	nd	neg	neg	0	neg	neg	0.01
15_0058	Validation	neg	nd	neg	neg	0	neg	neg	0.07
15_0059	Validation	neg	nd	neg	neg	0	neg	neg	0.09
15_0060	Validation	neg	nd	neg	neg	0	neg	neg	0
15_0061	Validation	neg	nd	neg	neg	0	neg	neg	0
15_0062	Training	neg	nd	neg	neg	0	neg	neg	0.01
15_0063	Validation	neg	nd	neg	neg	0	neg	neg	0
15_0064	Validation	neg	nd	neg	neg	0	neg	neg	0
15_0065	Training	neg	nd	neg	neg	0	neg	neg	0
15_0066	Validation	neg	nd	neg	neg	0	neg	neg	0
15_0067	Validation	neg	nd	neg	neg	0	neg	neg	0.02
15_0068	Validation	neg	nd	neg	neg	0	neg	neg	0.04
15_0069	Validation	neg	nd	neg	neg	0	neg	neg	0.08
15_0070	Validation	neg	nd	neg	neg	0	neg	neg	0
15_0071	Training	neg	nd	neg	neg	0	neg	neg	0
15_0072	Validation	neg	nd	neg	neg	0	neg	neg	0.02
15_0073	Validation	neg	nd	neg	neg	0	neg	neg	0.01
15_0074	Training	neg	nd	neg	neg	0	neg	neg	0
15_0075	Validation	neg	nd	neg	neg	0	neg	neg	0.02
15_0076	Validation	neg	nd	neg	neg	0	neg	neg	0
15_0077	Training	neg	nd	neg	neg	0	neg	neg	0
15_0078	Training	neg	nd	neg	neg	0	neg	neg	0.01
15_0079	Training	neg	nd	neg	neg	0	neg	neg	0
15_0080	Validation	neg	nd	neg	neg	0	neg	neg	0
15_0081	Validation	neg	nd	neg	neg	0	neg	neg	0
15_0082	Validation	neg	nd	neg	neg	0	neg	neg	0
15_0083	Training	neg	nd	neg	neg	0	neg	neg	0
15_0084	Validation	neg	nd	neg	neg	0	neg	neg	0
15_0085	Validation	neg	nd	neg	neg	0	neg	neg	0
15_0086	Training	neg	nd	neg	neg	0	neg	neg	0
15_0087	Validation	neg	nd	neg	neg	0	neg	neg	0
15_0088	Validation	neg	nd	neg	neg	0	neg	neg	0.16
19_0151	Training	neg	nd	nd	nd	0	neg	na	0
19_0152	Validation	neg	nd	nd	nd	0	neg	na	0.02
19_0153	Validation	neg	nd	nd	nd	0	neg	na	0
19_0154	Training	neg	nd	nd	nd	0	neg	na	0
19_0155	Validation	neg	nd	nd	nd	0	neg	na	0
19_0156	Validation	neg	nd	nd	nd	0	neg	na	0
19_0157	Training	pos	nd	nd	nd	50.1429	pos	pos	0.03
19_0158	Training	neg	nd	nd	nd	0	neg	na	0
19_0159	Validation	neg	nd	nd	nd	0	neg	na	0.07
19_0160	Validation	neg	nd	nd	nd	0	neg	na	0
19_0161	Validation	neg	nd	nd	nd	0	neg	na	0
19_0162	Validation	neg	nd	nd	nd	0	neg	na	0.02
19_0163	Training	neg	nd	nd	nd	0	neg	na	0
P23C0	Validation	nd	nd	nd	nd	0	neg	neg	0
P25C0	Training	nd	nd	nd	nd	0	neg	neg	0
P38C0	Validation	nd	nd	nd	nd	0	neg	neg	0
P6C0	Validation	nd	nd	nd	nd	0	neg	neg	0
P7C0	Validation	nd	nd	nd	nd	0	neg	neg	0
P8C0	Training	nd	nd	nd	nd	0	neg	neg	0

## Sheet: stx
stx-producing organisms
StudyID	Set	culture	BDMax	BioFire	PCRsummary	NEW_1st allele	CMg	Composite	NEWEcoli%(Kraken)
14_0001	Validation	pos	nd	nd	nd	100	pos	pos	21.07
14_0002	Validation	neg	nd	nd	nd	0	neg	na	0.03
14_0003	Training	neg	nd	nd	nd	0	neg	na	4.87
14_0004	Validation	neg	nd	nd	nd	0	neg	na	4.34
14_0005	Training	neg	nd	nd	nd	0	neg	na	0.2
14_0006	Validation	neg	nd	nd	nd	0	neg	na	16.57
19_0002	Training	nd	neg	nd	neg	0	neg	na	0.02
14_0008	Validation	neg	nd	nd	nd	0	neg	na	0.98
15_0001	Validation	neg	nd	nd	nd	0	neg	na	9.06
15_0002	Validation	neg	nd	nd	nd	0	neg	na	22.94
19_0004	Training	nd	neg	nd	neg	0	neg	na	0
19_0005	Validation	nd	neg	nd	neg	0	neg	na	0.67
19_0007	Training	nd	neg	nd	neg	0	neg	na	0
19_0009	Validation	nd	neg	neg	neg	0	neg	neg	0.03
19_0010	Validation	nd	neg	neg	neg	0	neg	neg	0.1
19_0012	Validation	nd	neg	nd	neg	0	neg	na	5.37
19_0014	Validation	nd	neg	neg	neg	0	neg	neg	0.36
19_0015	Validation	nd	neg	nd	neg	0	neg	na	0.12
19_0016	Training	nd	neg	neg	neg	0	neg	neg	1.5
19_0017	Validation	nd	neg	nd	neg	0	neg	na	3.86
19_0018	Validation	nd	neg	nd	neg	0	neg	na	0.05
19_0019	Training	nd	neg	nd	neg	0	neg	na	0
19_0020	Training	nd	neg	nd	neg	0	neg	na	30.34
19_0021	Validation	nd	neg	neg	neg	0	neg	neg	12.29
19_0023	Validation	nd	neg	nd	neg	0	neg	na	45.64
19_0025	Training	nd	neg	nd	neg	0	neg	na	0
19_0027	Validation	nd	neg	nd	neg	0	neg	na	10.15
19_0028	Validation	nd	neg	nd	neg	0	neg	na	0.79
19_0029	Validation	nd	neg	nd	neg	0	neg	na	2.59
19_0032	Validation	nd	neg	nd	neg	0	neg	na	22.71
19_0033	Validation	nd	neg	nd	neg	0	neg	na	10.22
19_0034	Training	nd	neg	neg	neg	0	neg	neg	1.79
19_0037	Training	nd	neg	neg	neg	0	neg	neg	0
19_0040	Training	nd	neg	neg	neg	0	neg	neg	5.55
19_0042	Validation	nd	neg	nd	neg	0	neg	na	11.67
19_0043	Training	nd	neg	neg	neg	0	neg	neg	0.03
19_0047	Validation	nd	neg	neg	neg	0	neg	neg	0.03
19_0048	Validation	nd	neg	nd	neg	0	neg	na	8.29
19_0050	Validation	nd	neg	neg	neg	0	neg	neg	0.68
19_0052	Training	nd	neg	neg	neg	0	neg	neg	2.89
19_0054	Validation	nd	neg	nd	neg	0	neg	na	0.69
19_0055	Training	nd	neg	nd	neg	0	neg	na	0.28
19_0056	Training	nd	neg	nd	neg	0	neg	na	0.05
19_0057	Validation	nd	neg	neg	neg	0	neg	neg	0.09
19_0058	Validation	nd	neg	neg	neg	0	neg	neg	0.08
19_0059	Validation	nd	neg	neg	neg	0	neg	neg	0.01
15_0039	Validation	neg	nd	nd	nd	0	neg	na	1.89
19_0060	Validation	nd	neg	nd	neg	0	neg	na	0
19_0061	Training	nd	neg	nd	neg	0	neg	na	0.56
19_0062	Validation	nd	neg	nd	neg	0	neg	na	0.25
19_0063	Validation	nd	neg	nd	neg	0	neg	na	0.45
19_0064	Validation	nd	neg	nd	neg	0	neg	na	6.03
19_0065	Validation	nd	neg	nd	neg	0	neg	na	0.01
19_0066	Validation	nd	neg	nd	neg	0	neg	na	0.03
19_0067	Training	nd	neg	nd	neg	0	neg	na	5.59
19_0068	Validation	nd	neg	nd	neg	0	neg	na	15.26
19_0070	Training	nd	neg	nd	neg	0	neg	na	0.59
19_0076	Training	nd	neg	nd	neg	0	neg	na	0.33
15_0051	Training	neg	nd	nd	nd	0	neg	na	15.12
19_0077	Validation	nd	neg	neg	neg	0	neg	neg	0
19_0078	Validation	nd	neg	neg	neg	0	neg	neg	17.89
15_0054	Validation	neg	nd	nd	nd	0	neg	na	1.11
19_0079	Training	nd	neg	nd	neg	0	neg	na	9.84
19_0080	Training	nd	neg	neg	neg	0	neg	neg	0.03
19_0081	Validation	nd	neg	nd	neg	0	neg	na	22.65
19_0082	Training	nd	neg	neg	neg	0	neg	neg	0
19_0090	Validation	nd	neg	neg	neg	0	neg	neg	0.03
19_0091	Training	nd	neg	neg	neg	0	neg	neg	1.02
19_0092	Validation	nd	neg	neg	neg	0	neg	neg	0.4
19_0094	Validation	nd	neg	nd	neg	0	neg	na	0.07
19_0096	Validation	nd	neg	nd	neg	0	neg	na	0
19_0097	Training	nd	neg	neg	neg	0	neg	neg	11.74
19_0098	Validation	nd	neg	nd	neg	0	neg	na	0.29
19_0099	Validation	nd	neg	pos	conflict	81.3223	pos	na	1.19
19_0100	Training	nd	neg	nd	neg	0	neg	na	0
19_0101	Validation	nd	neg	nd	neg	0	neg	na	0
19_0102	Validation	nd	neg	neg	neg	0	neg	neg	0
19_0103	Training	nd	neg	neg	neg	0	neg	neg	0.01
19_0104	Validation	nd	neg	nd	neg	0	neg	na	20.21
19_0105	Validation	nd	neg	neg	neg	0	neg	neg	0
19_0107	Validation	nd	neg	nd	neg	0	neg	na	0.01
19_0108	Validation	nd	neg	nd	neg	0	neg	na	1.58
19_0109	Training	nd	neg	nd	neg	0	neg	na	0.02
19_0110	Validation	nd	neg	nd	neg	0	neg	na	0.23
19_0111	Validation	nd	neg	nd	neg	0	neg	na	17.52
19_0112	Training	nd	neg	nd	neg	0	neg	na	8.89
19_0113	Validation	nd	neg	neg	neg	0	neg	neg	0
19_0115	Training	nd	neg	pos	conflict	0	neg	na	0.16
19_0116	Validation	nd	neg	nd	neg	0	neg	na	0
19_0117	Training	nd	neg	neg	neg	12.243	pos	neg	0.04
19_0118	Validation	nd	neg	neg	neg	0	neg	neg	4.74
19_0120	Validation	nd	neg	nd	neg	0	neg	na	0.35
19_0121	Training	nd	neg	nd	neg	0	neg	na	0.28
19_0122	Validation	nd	neg	neg	neg	0	neg	neg	0
19_0123	Validation	nd	neg	neg	neg	0	neg	neg	7.83
19_0124	Validation	nd	neg	nd	neg	0	neg	na	3.29
19_0126	Validation	nd	neg	nd	neg	0	neg	na	0
19_0127	Training	nd	neg	nd	neg	0	neg	na	0.32
19_0128	Validation	nd	neg	nd	neg	0	neg	na	0.63
19_0129	Validation	nd	neg	neg	neg	0	neg	neg	1.75
19_0130	Training	nd	neg	nd	neg	0	neg	na	20.35
19_0131	Validation	nd	neg	neg	neg	0	neg	neg	0.46
19_0132	Validation	nd	neg	neg	neg	0	neg	neg	1.02
19_0133	Training	nd	neg	nd	neg	0	neg	na	15.38
19_0134	Training	nd	neg	nd	neg	0	neg	na	0.55
19_0135	Validation	nd	neg	nd	neg	0	neg	na	14.02
19_0136	Validation	nd	neg	nd	neg	0	neg	na	24.69
19_0137	Validation	nd	neg	nd	neg	0	neg	na	6.21
19_0138	Validation	nd	neg	neg	neg	0	neg	neg	0
19_0139	Training	nd	neg	nd	neg	0	neg	na	0.71
19_0140	Training	nd	neg	neg	neg	0	neg	neg	0.09
19_0141	Validation	nd	neg	nd	neg	0	neg	na	4.07
19_0142	Training	nd	neg	neg	neg	0	neg	na	20.45
19_0143	Validation	nd	neg	neg	neg	0	neg	neg	28.14
19_0144	Validation	nd	neg	nd	neg	0	neg	na	1.67
19_0145	Training	nd	neg	nd	neg	0	neg	na	0.14
19_0146	Validation	nd	neg	neg	neg	0	neg	neg	0
19_0147	Validation	nd	neg	nd	neg	0	neg	na	2.96
19_0149	Validation	nd	neg	nd	neg	0	neg	na	27.66
19_0008	Validation	neg	ind	neg	conflict	0	neg	neg	0.01
17_0025	Validation	neg	nd	nd	nd	0	neg	na	3.42
17_0026	Validation	neg	nd	nd	nd	0	neg	na	0
17_0027	Validation	pos	nd	nd	nd	0	neg	pos	1.15
17_0028	Training	neg	nd	nd	nd	0	neg	na	10.74
17_0029	Validation	neg	nd	nd	nd	0	neg	na	0.08
17_0030	Validation	neg	nd	nd	nd	0	neg	na	0
17_0031	Training	neg	nd	nd	nd	0	neg	na	0
17_0032	Validation	neg	nd	nd	nd	0	neg	na	6.07
19_0053	TRAINING	neg	ind	pos	conflict	0	neg	na	0.05
17_0034	Validation	neg	nd	nd	nd	0	neg	na	34.11
17_0035	Training	neg	nd	nd	nd	0	neg	na	0
17_0036	Validation	neg	nd	nd	nd	0	neg	na	0.86
18_0001	Training	neg	nd	nd	nd	0	neg	na	0.26
18_0002	Validation	neg	nd	nd	nd	0	neg	na	29.55
18_0003	Validation	neg	nd	nd	nd	0	neg	na	0.48
19_0088	Training	neg	ind	neg	conflict	0	neg	neg	4.33
18_0005	Validation	neg	nd	nd	nd	0	neg	na	19.24
18_0006	Validation	neg	nd	nd	nd	0	neg	na	12.01
18_0007	Training	neg	nd	nd	nd	0	neg	na	3.84
18_0008	Validation	neg	nd	nd	nd	0	neg	na	9.58
18_0009	Validation	neg	nd	nd	nd	0	neg	na	3.12
19_0114	Validation	neg	ind	neg	conflict	0	neg	neg	0
17_0008	Validation	pos	neg	pos	conflict	0	neg	pos	0
14_0007	Training	neg	nd	neg	neg	0	neg	neg	0.5
15_0003	Validation	neg	nd	neg	neg	0	neg	neg	0.1
15_0004	Training	neg	nd	neg	neg	0	neg	neg	0.08
15_0005	Validation	neg	nd	neg	neg	0	neg	neg	0.07
15_0006	Validation	neg	nd	neg	neg	0	neg	neg	2.31
15_0007	Validation	neg	nd	neg	neg	0	neg	neg	45.78
15_0008	Training	neg	nd	neg	neg	0	neg	neg	0.37
15_0009	Validation	neg	nd	neg	neg	0	neg	neg	0.43
15_0010	Validation	neg	nd	neg	neg	0	neg	neg	19.26
15_0011	Training	neg	nd	neg	neg	0	neg	neg	33.92
15_0012	Validation	neg	nd	neg	neg	0	neg	neg	0
15_0013	Validation	neg	nd	neg	neg	0	neg	neg	4.79
15_0014	Training	neg	nd	neg	neg	0	neg	neg	0.06
15_0015	Training	neg	nd	neg	neg	0	neg	neg	50.35
15_0016	Validation	neg	nd	neg	neg	0	neg	neg	33.01
15_0017	Validation	neg	nd	neg	neg	0	neg	neg	0.07
15_0018	Validation	neg	nd	neg	neg	0	neg	neg	6.88
15_0019	Validation	neg	nd	neg	neg	0	neg	neg	2.31
15_0020	Training	neg	nd	neg	neg	0	neg	neg	8.28
15_0021	Validation	neg	nd	neg	neg	0	neg	neg	0
15_0022	Validation	neg	nd	neg	neg	0	neg	neg	3.68
15_0023	Training	neg	nd	neg	neg	0	neg	neg	19.95
15_0024	Validation	neg	nd	neg	neg	0	neg	neg	5.27
15_0025	Validation	neg	nd	neg	neg	0	neg	neg	1.16
15_0026	Training	neg	nd	neg	neg	0	neg	neg	0
15_0027	Validation	neg	nd	neg	neg	0	neg	neg	0
15_0028	Validation	neg	nd	neg	neg	0	neg	neg	0.11
15_0029	Validation	neg	nd	neg	neg	0	neg	neg	0.69
15_0030	Validation	neg	nd	neg	neg	0	neg	neg	0.81
15_0031	Validation	neg	nd	neg	neg	0	neg	neg	0
15_0032	Training	neg	nd	neg	neg	0	neg	neg	51.78
15_0033	Validation	neg	nd	neg	neg	0	neg	neg	0.01
15_0034	Training	neg	nd	neg	neg	0	neg	neg	0.24
15_0035	Validation	neg	nd	neg	neg	0	neg	neg	22.42
15_0036	Validation	neg	nd	neg	neg	0	neg	neg	10.99
15_0037	Validation	neg	nd	neg	neg	0	neg	neg	0.2
15_0038	Training	neg	nd	neg	neg	0	neg	neg	0.04
15_0040	Validation	neg	nd	neg	neg	0	neg	neg	1.6
15_0041	Training	neg	nd	neg	neg	0	neg	neg	3.64
15_0042	Validation	neg	nd	neg	neg	0	neg	neg	0.22
15_0043	Validation	neg	nd	neg	neg	0	neg	neg	5.44
15_0044	Training	neg	nd	neg	neg	0	neg	neg	0
15_0045	Validation	neg	nd	neg	neg	0	neg	neg	34.01
15_0046	Validation	neg	nd	neg	neg	0	neg	neg	0
15_0047	Validation	neg	nd	neg	neg	0	neg	neg	9.38
15_0048	Validation	neg	nd	neg	neg	0	neg	neg	0.15
15_0049	Validation	neg	nd	neg	neg	0	neg	neg	0
15_0050	Training	neg	nd	neg	neg	0	neg	neg	0.09
15_0052	Validation	neg	nd	neg	neg	0	neg	neg	0.21
15_0053	Training	neg	nd	neg	neg	0	neg	neg	0.04
15_0055	Validation	neg	nd	neg	neg	0	neg	neg	2.11
15_0056	Training	neg	nd	neg	neg	0	neg	neg	0.13
15_0057	Validation	neg	nd	neg	neg	0	neg	neg	6.09
15_0058	Validation	neg	nd	neg	neg	0	neg	neg	45.88
15_0059	Validation	neg	nd	neg	neg	0	neg	neg	15.5
15_0060	Validation	neg	nd	neg	neg	0	neg	neg	0.02
15_0061	Validation	neg	nd	neg	neg	0	neg	neg	0
15_0062	Training	neg	nd	neg	neg	0	neg	neg	1.71
15_0063	Validation	neg	nd	neg	neg	0	neg	neg	0.48
15_0064	Validation	neg	nd	neg	neg	0	neg	neg	1.43
15_0065	Training	neg	nd	neg	neg	0	neg	neg	0.02
15_0066	Validation	neg	nd	neg	neg	0	neg	neg	0.64
15_0067	Validation	neg	nd	neg	neg	0	neg	neg	21.24
15_0068	Validation	neg	nd	neg	neg	0	neg	neg	9.06
15_0069	Validation	neg	nd	neg	neg	0	neg	neg	26.97
15_0070	Validation	neg	nd	neg	neg	0	neg	neg	2.93
15_0071	Training	neg	nd	neg	neg	0	neg	neg	3.42
15_0072	Validation	neg	nd	neg	neg	0	neg	neg	29.12
15_0073	Validation	neg	nd	neg	neg	0	neg	neg	0.98
15_0074	Training	neg	nd	neg	neg	0	neg	neg	0.75
15_0075	Validation	neg	nd	neg	neg	0	neg	neg	27.2
15_0076	Validation	neg	nd	neg	neg	0	neg	neg	0
15_0077	Training	neg	nd	neg	neg	0	neg	neg	0
15_0078	Training	neg	nd	neg	neg	0	neg	neg	11.14
15_0079	Training	neg	nd	neg	neg	0	neg	neg	0.4
15_0080	Validation	neg	nd	neg	neg	0	neg	neg	0
15_0081	Validation	neg	nd	neg	neg	0	neg	neg	0.11
15_0082	Validation	neg	nd	neg	neg	0	neg	neg	0.32
15_0083	Training	neg	nd	neg	neg	0	neg	neg	0.23
15_0084	Validation	neg	nd	neg	neg	0	neg	neg	0.15
15_0085	Validation	neg	nd	neg	neg	0	neg	neg	0.03
15_0086	Training	neg	nd	neg	neg	0	neg	neg	0.64
15_0087	Validation	neg	nd	neg	neg	0	neg	neg	0.03
15_0088	Validation	neg	nd	neg	neg	0	neg	neg	12.61
17_0014	Validation	neg	neg	nd	neg	0	neg	neg	6.77
17_0017	Validation	neg	neg	neg	neg	0	neg	neg	6.97
17_0018	Validation	neg	neg	neg	neg	0	neg	neg	0.94
17_0019	Validation	neg	neg	neg	neg	0	neg	neg	8.71
17_0020	Validation	neg	neg	neg	neg	0	neg	neg	0.6
17_0021	Validation	neg	neg	neg	neg	0	neg	neg	0.12
17_0022	Training	neg	neg	neg	neg	0	neg	neg	0.02
17_0023	Validation	neg	neg	neg	neg	0	neg	neg	0.01
17_0033	Training	neg	nd	neg	neg	0	neg	neg	0.35
17_0001	Training	neg	pos	pos	pos	0	neg	pos	5.17
17_0002	Validation	neg	pos	pos	pos	0	neg	pos	0.06
17_0003	Validation	neg	pos	pos	pos	0	neg	pos	0.39
17_0004	Training	neg	pos	pos	pos	0	neg	pos	0.02
17_0005	Validation	neg	pos	pos	pos	0	neg	pos	8.27
17_0006	Validation	neg	pos	pos	pos	0	neg	pos	5.65
17_0007	Training	neg	pos	pos	pos	0	neg	pos	4.16
17_0009	Validation	neg	pos	pos	pos	0	neg	pos	0.37
17_0010	Training	neg	pos	pos	pos	0	neg	pos	0.19
17_0011	Validation	neg	pos	pos	pos	0	neg	pos	0.09
17_0013	Training	neg	pos	pos	pos	0	neg	pos	1.28
17_0015	Validation	neg	pos	pos	pos	84.0496	pos	pos	0.69
17_0016	Validation	neg	pos	pos	pos	0	neg	pos	0.17
17_0024	Training	neg	pos	pos	pos	0	neg	pos	0.37
19_0011	Validation	neg	pos	pos	pos	61.5638	pos	pos	2.88
19_0013	Training	neg	pos	pos	pos	9.16808	pos	pos	0.16
19_0022	Training	neg	pos	pos	pos	0	neg	pos	0
19_0024	Validation	neg	pos	pos	pos	0	neg	pos	0
19_0045	Training	neg	pos	pos	pos	0	neg	pos	0.1
19_0049	Training	neg	pos	pos	pos	0	neg	pos	4.94
19_0106	Training	neg	pos	pos	pos	0	neg	pos	1.97
17_0012	Validation	pos	pos	pos	pos	59.3672	pos	pos	1.08
18_0004	Training	pos	nd	pos	pos	60.7407	pos	pos	2.05
19_0001	Validation	pos	pos	nd	pos	3.26279	pos	pos	33.17
19_0003	Validation	pos	pos	nd	pos	8.23045	pos	pos	0.02
19_0006	Validation	pos	pos	nd	pos	41.632	pos	pos	2.79
19_0026	Validation	pos	pos	nd	pos	19.3172	pos	pos	0.1
19_0030	Validation	pos	pos	nd	pos	100	pos	pos	0.8
19_0031	Validation	pos	pos	nd	pos	100	pos	pos	0.97
19_0035	Validation	pos	pos	pos	pos	14.6545	pos	pos	0.13
19_0036	Validation	pos	pos	pos	pos	41.4815	pos	pos	0.03
19_0038	Validation	pos	pos	nd	pos	8.40966	pos	pos	0.41
19_0039	Validation	pos	pos	nd	pos	79.0175	pos	pos	2.47
19_0041	Validation	pos	pos	nd	pos	100	pos	pos	20.82
19_0044	Validation	pos	pos	nd	pos	100	pos	pos	21.15
19_0046	Training	pos	pos	nd	pos	10.3247	pos	pos	13.08
19_0051	Validation	pos	pos	pos	pos	29.7942	pos	pos	0.33
19_0069	Validation	pos	pos	nd	pos	17.8601	pos	pos	0.25
19_0071	Training	pos	pos	nd	pos	37.552	pos	pos	0.02
19_0072	Validation	pos	pos	nd	pos	52.7061	pos	pos	2.91
19_0073	Training	pos	pos	nd	pos	0	neg	pos	1.17
19_0074	Validation	pos	pos	nd	pos	0	neg	pos	0.31
19_0075	Validation	pos	pos	nd	pos	0	neg	pos	0.6
19_0083	Validation	pos	pos	nd	pos	97.6132	pos	pos	0.73
19_0084	Validation	pos	pos	nd	pos	27.572	pos	pos	0.08
19_0085	Training	pos	pos	nd	pos	17.3832	pos	pos	0.21
19_0086	Validation	pos	pos	nd	pos	9.46502	pos	pos	7.92
19_0087	Validation	pos	pos	nd	pos	67.3605	pos	pos	1.89
19_0089	Training	pos	pos	nd	pos	1.49533	pos	pos	0.06
19_0093	Training	pos	pos	nd	pos	10.3993	pos	pos	0.03
19_0095	Validation	pos	pos	nd	pos	0	neg	pos	0.04
19_0119	Validation	pos	pos	nd	pos	98.2716	pos	pos	6.28
19_0125	Training	pos	pos	nd	pos	12.7394	pos	pos	12.92
19_0148	Training	pos	pos	nd	pos	17.7352	pos	pos	0.21
19_0150	Training	pos	pos	nd	pos	0	neg	pos	1.48
19_0151	Training	neg	nd	nd	nd	0	neg	na	0.24
19_0152	Validation	neg	nd	nd	nd	0	neg	na	10.35
19_0153	Validation	neg	nd	nd	nd	0	neg	na	0.06
19_0154	Training	neg	nd	nd	nd	0	neg	na	0.06
19_0155	Validation	neg	nd	nd	nd	0	neg	na	1.43
19_0156	Validation	neg	nd	nd	nd	0	neg	na	0.36
19_0157	Training	neg	nd	nd	nd	0	neg	na	1.47
19_0158	Training	pos	nd	nd	nd	51.8518	pos	pos	0.21
19_0159	Validation	pos	nd	nd	nd	100	pos	pos	65.34
19_0160	Validation	neg	nd	nd	nd	0	neg	na	0.02
19_0161	Validation	pos	nd	nd	nd	51.5226	pos	pos	0.16
19_0162	Validation	neg	nd	nd	nd	0	neg	na	31.55
19_0163	Training	pos	nd	nd	nd	49.236	pos	pos	19.21
P23C0	Validation	nd	nd	nd	nd	0	neg	neg	0.05
P25C0	Training	nd	nd	nd	nd	0	neg	neg	0
P38C0	Validation	nd	nd	nd	nd	0	neg	neg	0
P6C0	Validation	nd	nd	nd	nd	0	neg	neg	0
P7C0	Validation	nd	nd	nd	nd	0	neg	neg	0.02
P8C0	Training	nd	nd	nd	nd	0	neg	neg	0.01

## Sheet: Tool comparison
StudyID	Campy-inhouse.kat	CampyVFDB.kat	SalmVFDB.kat	ShigVFDB.kat	STX.kat	CampyVFDB.srst2	Campy-inhouse.srst2	SalmVFDB.srst2	ShigVFDB.srst2	STX.srst2	Campylobacter.kraken2	Escherichia coli.kraken2	Salmonella enterica subsp. enterica.kraken2	Shigella flexneri.kraken2	Campylobacter.metaphlan	Escherichia_coli.metaphlan	Salmonella_enterica.metaphlan	Shigella_flexneri.metaphlan
14_0001	2	0	2	82	142	0	0	34	24	2	0.01	21.07	0.07	0.07	0	38.6422	0	0
14_0002	1670	390	0	54	0	88	677	0	0	0	0.21	0.03	0	0	0.56176	0.05114	0	0
14_0003	361	83	2	140	0	1	7	36	36	0	0.04	4.87	0.01	0.01	0.06696	11.0027	0	0
14_0004	1592	425	1	147	0	22	193	23	43	0	0.08	4.34	0.01	0.01	0.2248	11.7452	0	0
14_0005	3	0	1705	156	0	0	0	220	40	0	0.01	0.2	0.03	0	0	1.14083	0.44438	0
14_0006	1	0	1	408	0	0	0	28	91	0	0.04	16.57	0.24	1.06	0	0	0	0
14_0007	3	0	2	163	0	0	0	19	26	0	0.01	0.5	0.01	0	0	4.10922	0	0
14_0008	2	0	1576	128	0	0	0	288	40	0	0.01	0.98	6.81	0	0	1.87748	57.5405	0
15_0001	0	0	1744	127	0	0	0	305	41	0	0.01	9.06	1.19	0.02	0	24.0339	29.3552	0
15_0002	1	0	1	418	0	0	0	36	90	0	0	22.94	0.25	2.96	0	0.00886	0	0
15_0003	1	0	0	50	0	0	0	0	0	0	0	0.1	0	0	0	0.18003	0	0
15_0004	1	0	0	26	0	0	0	1	2	0	0.01	0.08	0.01	0	0	0.04137	0	0
15_0005	1	0	1	65	0	0	0	0	0	0	0.01	0.07	0	0	0	0.46751	0	0
15_0006	0	0	1	109	0	0	0	0	5	0	0	2.31	0	0	0	29.5915	0	0
15_0007	1	0	2	128	0	0	0	28	40	0	0	45.78	0.03	0.03	0	91.0626	0	0
15_0008	0	0	0	0	0	0	0	0	0	0	0.02	0.37	0	0	0	0	0	0
15_0009	2	0	0	107	0	0	0	0	4	0	0.03	0.43	0	0	0	2.82493	0	0
15_0010	2	0	0	125	0	0	0	18	35	0	0.01	19.26	0.02	0.01	0	53.7576	0	0
15_0011	1	0	2	136	0	0	0	28	46	0	0	33.92	0.03	0.05	0	84.1872	0	0
15_0012	1	0	0	2	0	0	0	0	0	0	0.01	0	0	0	0	0	0	0
15_0013	0	0	0	6	0	0	0	0	0	0	0.01	4.79	0.01	0	0	0	0	0
15_0014	1	0	25	2	0	0	0	42	4	0	0.04	0.06	0.01	0	0	0.01868	0	0
15_0015	0	0	2	128	0	0	0	29	40	0	0	50.35	0.04	0.04	0	93.9008	0	0
15_0016	1	0	1	124	0	0	0	24	38	0	0	33.01	0.19	0.04	0	23.5567	0	0
15_0017	1	0	1	101	0	0	0	0	3	0	0.03	0.07	0	0	0	0.58043	0	0
15_0018	1	0	2	144	0	0	0	11	40	0	0.02	6.88	0	0.02	0	16.1413	0	0
15_0019	1	0	1	131	0	0	0	11	43	0	0	2.31	0	0	0	6.20352	0	0
15_0020	1	0	1	140	0	0	0	17	41	0	0	8.28	0.01	0.01	0	9.48824	0	0
15_0021	1	0	0	0	0	0	0	0	0	0	0.03	0	0	0	0	0	0	0
15_0022	1	0	2	83	0	0	0	18	12	0	0.08	3.68	0.02	0.01	0	7.99738	0	0
15_0023	1	0	1	128	0	0	0	17	41	0	0.01	19.95	0.01	0.04	0	34.4849	0	0
15_0024	1	0	2	152	0	0	0	2	39	0	0.01	5.27	0.04	0	0	5.8792	0	0
15_0025	8	0	3	100	0	0	0	30	30	0	0.01	1.16	0.04	0.01	0	7.67838	0	0
15_0026	2	0	0	0	0	0	0	0	0	0	0.09	0	0	0	0.07138	0	0	0
15_0027	1	0	0	4	0	0	0	0	0	0	0	0	0	0	0	0.00915	0	0
15_0028	1	0	2	94	0	0	0	7	31	0	0.03	0.11	0	0	0	1.39021	0	0
15_0029	2	0	1	122	0	0	0	10	31	0	0	0.69	0	0	0	3.90515	0	0
15_0030	1	0	1	146	0	0	0	0	6	0	0.01	0.81	0	0	0	3.16089	0	0
15_0031	1	0	0	0	0	0	0	0	0	0	0.28	0	0	0	0	0	0	0
15_0032	0	0	2	150	0	0	0	30	34	0	0	51.78	0.03	0.05	0	92.6639	0	0
15_0033	1	0	0	0	0	0	0	0	0	0	0.02	0.01	0	0	0	0	0	0
15_0034	1	0	2	101	0	0	0	3	16	0	0.01	0.24	0	0	0	3.74157	0	0
15_0035	0	0	1	72	0	0	0	25	12	0	0	22.42	0.05	0.06	0	79.3216	0	0
15_0036	1	0	1	122	0	0	0	20	31	0	0	10.99	0.03	0.07	0	68.5821	0	0
15_0037	0	0	0	0	0	0	0	0	0	0	0.23	0.2	0	0	0	0	0	0
15_0038	1	0	0	2	0	0	0	2	3	0	0.01	0.04	0	0	0	0.04543	0	0
15_0039	267	63	0	49	0	0	2	0	1	0	0.16	1.89	0.01	0.01	0	3.18493	0	0
15_0040	2	0	1	116	0	0	0	11	28	0	0.01	1.6	0.01	0.01	0	4.59331	0	0
15_0041	1	0	1	98	0	0	0	23	22	0	0.01	3.64	0.01	0.04	0	52.7593	0	0
15_0042	1	0	0	123	0	0	0	0	1	0	0.23	0.22	0	0	0	0.25726	0	0
15_0043	1	0	1	131	0	0	0	23	38	0	0.02	5.44	0.01	0.01	0	15.8522	0	0
15_0044	0	0	0	0	0	0	0	0	0	0	0	0	0	0	0	0	0	0
15_0045	0	0	6	148	0	0	0	33	49	0	0.01	34.01	0.11	0.06	0	93.2956	0	0
15_0046	2	0	0	0	0	0	0	0	0	0	0.23	0	0	0	0.17634	0	0	0
15_0047	1	0	2	287	0	0	0	27	54	0	0.04	9.38	0.02	0.04	0	20.1916	0	0
15_0048	1	0	1	104	0	0	0	0	0	0	0.03	0.15	0	0	0	0.31727	0	0
15_0049	1	0	0	0	0	0	0	0	0	0	0.01	0	0	0	0	0	0	0
15_0050	1	0	2	96	0	0	0	0	1	0	0.02	0.09	0	0	0	0.60906	0	0
15_0051	0	0	916	129	0	0	0	26	41	0	0	15.12	0.08	0.04	0	17.0787	0.15215	0
15_0052	1	0	17	1	0	0	0	20	2	0	0	0.21	0.01	0	0	0	0	0
15_0053	2	0	2	62	0	0	0	0	0	0	0.02	0.04	0	0	0	0.06188	0	0
15_0054	1	0	63	143	0	0	0	6	13	0	0.04	1.11	0.01	0	0	1.92476	0	0
15_0055	1	0	1	140	0	0	0	18	38	0	0.02	2.11	0.14	0	0	3.78563	0	0
15_0056	1	0	17	1	0	0	0	32	3	0	0.01	0.13	0.03	0	0	0	0	0
15_0057	1	0	2	140	0	0	0	19	40	0	0	6.09	0.01	0.01	0	15.604	0	0
15_0058	2	0	1	144	0	0	0	30	44	0	0.03	45.88	0.04	0.07	0	74.174	0	0
15_0059	0	0	3	118	0	0	0	35	30	0	0	15.5	0.04	0.09	0	65.5668	0	0
15_0060	1	0	0	60	0	0	0	0	0	0	0.01	0.02	0	0	0	0.03624	0	0
15_0061	1	0	0	3	0	0	0	0	0	0	0.02	0	0	0	0	0	0	0
15_0062	1	0	1	154	0	0	0	20	28	0	0.03	1.71	0	0.01	0	12.1821	0	0
15_0063	1	0	2	92	0	0	0	1	1	0	0.01	0.48	0	0	0	0.79049	0	0
15_0064	2	0	1	147	0	0	0	11	47	0	0.02	1.43	0	0	0	3.00053	0	0
15_0065	1	0	0	15	0	0	0	0	0	0	0.01	0.02	0	0	0	0	0	0
15_0066	1	0	1	125	0	0	0	8	34	0	0.02	0.64	0	0	0	1.73949	0	0
15_0067	2	0	0	110	0	0	0	23	29	0	0.01	21.24	0.02	0.02	0	32.5167	0	0
15_0068	1	0	2	150	0	0	0	26	41	0	0.01	9.06	0.01	0.04	0	48.591	0	0
15_0069	0	0	1	149	0	0	0	29	45	0	0	26.97	0.05	0.08	0	89.1757	0	0
15_0070	1	0	3	134	0	0	0	20	38	0	0.01	2.93	0	0	0	6.84664	0	0
15_0071	1	0	1	144	0	0	0	17	43	0	0.01	3.42	0	0	0	13.8014	0	0
15_0072	1	0	1	143	0	0	2	28	41	0	0.21	29.12	0.17	0.02	0.04005	39.9235	0	0
15_0073	0	0	0	9	0	0	0	0	0	0	0.01	0.98	0	0.01	0	0	0	0
15_0074	1	0	0	127	0	0	0	5	28	0	0.02	0.75	0	0	0	3.47299	0	0
15_0075	1	0	1	143	0	0	0	22	42	0	0.01	27.2	0.01	0.02	0	51.7846	0	0
15_0076	1	0	0	1	0	0	0	0	0	0	0.01	0	0	0	0	0	0	0
15_0077	1	0	0	3	0	0	0	0	0	0	0.02	0	0	0	0	0	0	0
15_0078	0	0	1	135	0	0	0	20	45	0	0.02	11.14	0	0.01	0	29.8179	0	0
15_0079	0	0	0	0	0	0	0	0	0	0	0	0.4	0	0	0	0	0	0
15_0080	2	0	0	0	0	0	1	0	0	0	0.01	0	0	0	0	0	0	0
15_0081	2	0	1	95	0	0	0	0	1	0	0.03	0.11	0	0	0	0.06718	0	0
15_0082	2	0	2	124	0	0	0	12	35	0	0.01	0.32	0	0	0	3.52378	0	0
15_0083	1	0	0	120	0	0	0	1	8	0	0.01	0.23	0	0	0	0.92843	0	0
15_0084	1	0	0	59	0	0	0	0	0	0	0.01	0.15	0	0	0	0.50942	0	0
15_0085	2	0	0	12	0	0	0	1	0	0	0.04	0.03	0	0	0	0.02537	0	0
15_0086	0	0	0	9	0	0	0	0	0	0	0.01	0.64	0	0	0	0	0	0
15_0087	0	0	0	20	0	0	0	4	0	0	0	0.03	0.02	0	0	0	0	0
15_0088	1	0	1	109	0	0	0	20	25	0	0.01	12.61	0.05	0.16	0	38.7386	0	0
17_0001	1	0	4	133	0	0	0	13	27	0	0.02	5.17	0.03	0.03	0	34.5379	0	0
17_0002	1	0	0	1	0	0	0	0	0	0	0.02	0.06	0	0	0	0	0	0
17_0003	2	0	0	37	0	0	0	0	0	0	0.03	0.39	0	0	0	1.15913	0	0
17_0004	1	0	1	7	0	0	0	0	0	0	0.03	0.02	0	0	0	0	0	0
17_0005	1	0	13	150	0	0	0	15	28	0	0.04	8.27	0.03	0.03	0	56.5928	0	0
17_0006	1	0	2	149	0	0	0	11	29	0	0.03	5.65	0.02	0.03	0	31.8133	0	0
17_0007	1	0	2	153	0	0	0	15	31	0	0.03	4.16	0.01	0.01	0	30.5555	0	0
17_0008	1	0	0	0	0	0	0	0	0	0	0.02	0	0	0	0	0	0	0
17_0009	0	0	1	56	0	0	0	0	0	0	0.01	0.37	0	0	0	52.1014	0	0
17_0010	0	0	0	64	0	0	0	0	0	0	0.01	0.19	0	0	0	0.20631	0	0
17_0011	0	0	0	7	0	0	0	0	0	0	0	0.09	0	0	0	0	0	0
17_0012	1	0	3	289	20	0	0	12	24	0	0.01	1.08	0.01	0.01	0	2.64005	0	0
17_0013	1	0	2	130	0	0	0	1	13	0	0.02	1.28	0.01	0.01	0	9.5997	0	0
17_0014	1691	474	1	119	0	97	505	0	20	0	15.33	6.77	0.06	0.03	38.0296	24.5808	0	0
17_0015	2	0	1	96	116	0	0	0	5	0	0.03	0.69	0	0	0	2.72289	0	0
17_0016	1	0	0	45	0	0	0	0	1	0	0.13	0.17	0	0	0	1.27348	0	0
17_0017	1	0	2	131	0	0	0	12	32	0	0.06	6.97	0.01	0.01	0	17.1457	0	0
17_0018	1	0	0	115	0	0	0	0	5	0	0.07	0.94	0	0	0	3.09626	0	0
17_0019	111	16	2	152	0	0	0	3	16	0	0.09	8.71	0.05	0.01	0	67.3583	0	0
17_0020	2	0	2	156	0	0	0	15	34	0	0.03	0.6	0	0	0	4.29913	0	0
17_0021	1	0	0	32	0	0	0	0	0	0	0.14	0.12	0	0	0	0.31482	0	0
17_0022	2	0	0	13	0	0	0	0	0	0	0.04	0.02	0	0	0	0	0	0
17_0023	3	0	0	20	0	0	0	0	0	0	0.03	0.01	0	0	0	0.05563	0	0
17_0024	1	0	0	65	0	0	0	1	1	0	0.02	0.37	0	0	0	1.27337	0	0
17_0025	173	31	2	143	0	0	1	6	31	0	0.07	3.42	0.03	0.07	0	57.2962	0	0
17_0026	2	0	1440	0	0	0	0	18	0	0	0.04	0	0.03	0	0	0	0.24029	0
17_0027	1	0	0	106	0	0	0	0	6	0	0.02	1.15	0	0.01	0	1.75973	0	0
17_0028	1672	429	2	154	0	83	612	17	36	0	4.52	10.74	0.04	0.03	11.4223	36.1195	0	0
17_0029	0	0	1741	2	0	0	0	310	3	0	0	0.08	13.59	0	0	0	74.0184	0
17_0030	1	0	1700	0	0	0	0	70	0	0	0.01	0	0.03	0	0	0	0.88946	0
17_0031	1	0	7	0	0	0	0	0	0	0	0.01	0	0	0	0	0	0	0
17_0032	0	0	1574	94	0	0	0	280	22	0	0	6.07	0.57	0.05	0	27.3466	1.76862	0
17_0033	1	0	2	123	0	0	0	1	9	0	0.01	0.35	0	0	0	0.59632	0	0
17_0034	2	0	1628	162	0	0	0	230	45	0	0.02	34.11	0.11	0.04	0	43.7278	1.13865	0.0289
17_0035	2	0	1348	0	0	0	0	13	0	0	0.01	0	0.01	0	0	0	0.15757	0
17_0036	2	0	1430	158	0	0	2	43	30	0	0.04	0.86	0.01	0.01	0	9.03168	0.24782	0
18_0001	2	0	1712	98	0	0	1	165	15	0	0.03	0.26	0.03	0	0	0.96711	0.7162	0
18_0002	1	0	1725	123	0	0	0	278	36	0	0	29.55	0.41	0.02	0	58.4349	4.32529	0
18_0003	2	0	1738	149	0	0	0	274	34	0	0.01	0.48	0.06	0	0	0.77095	1.22397	0
18_0004	1	0	14	158	96	0	0	38	52	0	0.01	2.05	0.01	0	0	3.11791	0	0
18_0005	1389	339	1	124	0	12	104	5	27	0	3.03	19.24	0.2	0.01	3.9055	31.5947	0	0
18_0006	1	0	3	144	0	0	0	37	45	0	0.01	12.01	0.02	0.02	0	32.0984	0	0
18_0007	1	0	1	112	0	0	0	15	36	0	0	3.84	0.01	0.01	0	9.99297	0	0
18_0008	3	0	1574	154	0	0	0	39	53	0	0.02	9.58	0.01	0.01	0	24.8767	0.15186	0
18_0009	1	0	1191	158	0	0	0	12	41	0	0.01	3.12	0.07	0	0	5.41255	0.62896	0
19_0001	1	0	1	150	0	0	0	6	39	0	0.01	33.17	0.02	0.03	0	91.7405	0	0
19_0002	1	0	1743	0	0	0	2	302	2	0	0.07	0.02	3.43	0	0	0	65.1034	0
19_0003	1	0	0	17	0	0	0	0	0	0	0.01	0.02	0	0	0	0	0	0
19_0004	1	0	1	15	0	0	0	0	0	0	0.01	0	0	0	0	0	0	0
19_0005	1	0	1	137	0	0	0	1	0	0	0.01	0.67	0	0.01	0	2.11281	0	0
19_0006	1666	445	2	153	19	66	506	13	48	0	0.95	2.79	0.03	0	2.24304	5.51116	0	0
19_0007	48	13	2	0	0	0	0	0	0	0	0.01	0	0	0	0	0	0	0
19_0008	1	0	0	5	0	0	0	0	0	0	0.02	0.01	0	0	0	0	0	0
19_0009	1	0	0	104	0	0	0	0	1	0	0.01	0.03	0	0	0	0.3574	0	0
19_0010	1	0	0	72	0	0	0	0	0	0	0.01	0.1	0	0	0	0.14424	0	0
19_0011	0	0	1	98	118	0	0	23	26	1	0	2.88	0.01	0.01	0	18.2974	0	0
19_0012	1718	457	1	138	0	134	728	21	40	0	2.13	5.37	0.01	0.01	8.32956	25.8688	0	0
19_0013	1	0	0	0	0	0	0	0	0	0	0.07	0.16	0	0	0	0	0	0
19_0014	1391	371	2	134	0	4	34	3	23	0	0.12	0.36	0.02	0	0.38201	2.53196	0	0
19_0015	1718	468	0	88	0	158	728	0	1	0	2.84	0.12	0	0	7.35177	0.26914	0	0
19_0016	243	66	1	112	0	0	0	16	28	0	0.09	1.5	0	0.01	0	11.0349	0	0
19_0017	1136	279	2	147	0	0	14	8	35	0	0.76	3.86	0.02	0.04	0.4672	13.2282	0	0
19_0018	2	0	1	271	0	0	1	1	2	0	0.13	0.05	0	0	0.49004	0.29772	0	0
19_0019	1	0	1504	18	0	0	0	53	0	0	0.04	0	0.03	0	0	0.04977	0.66908	0
19_0020	1638	455	2	151	0	38	303	14	50	0	1.53	30.34	0.33	0.03	3.86988	48.1797	0	0
19_0021	1586	440	34	164	0	20	156	35	50	0	0.17	12.29	0.04	0.02	0.28137	15.9413	0	0
19_0022	1	0	0	0	0	0	0	0	0	0	0.02	0	0	0	0	0	0	0
19_0023	0	0	185	162	0	0	0	2	16	0	0.01	45.64	0.13	0.05	0	97.1514	0	0
19_0024	1	0	0	2	0	0	0	0	0	0	0.02	0	0	0	0	0	0	0
19_0025	280	58	0	1	0	0	0	0	0	0	0.03	0	0	0	0.01585	0	0	0
19_0026	1	0	0	65	20	0	0	0	0	0	0.01	0.1	0	0	0	0.28257	0	0
19_0027	564	157	2	147	0	0	2	27	31	0	0.04	10.15	0.05	0.04	0.11746	68.0321	0	0
19_0028	1652	411	1	126	0	55	410	14	28	0	0.23	0.79	0.01	0	1.37138	9.08108	0	0
19_0029	1	0	962	100	0	0	0	25	26	0	0.01	2.59	0.01	0.02	0	18.0677	0.16165	0
19_0030	1	0	1	138	24	0	0	9	21	1	0	0.8	0.01	0	0	4.12042	0	0
19_0031	4	0	1	143	24	0	0	13	25	1	0.01	0.97	0.03	0	0	3.59113	0	0.02799
19_0032	1	0	49	149	0	0	0	27	47	0	0	22.71	0.02	0.03	0	50.1768	0	0
19_0033	2	0	199	126	0	0	0	29	39	0	0.01	10.22	0.01	0.01	0	18.4927	0	0
19_0034	1	0	2	159	0	0	0	17	38	0	0.25	1.79	0.01	0.01	0	13.2357	0	0
19_0035	91	0	0	136	15	0	2	0	2	0	0.03	0.13	0	0	0.57375	0.02444	0	0
19_0036	199	0	0	14	113	5	221	0	0	0	0.23	0.03	0	0	0.75094	0.07435	0	0
19_0037	1	0	0	0	0	0	0	0	0	0	0.02	0	0	0	0	0	0	0
19_0038	1	0	1	148	0	0	0	5	22	0	0.01	0.41	0	0	0	1.01013	0	0
19_0039	2	0	1	149	138	0	0	11	46	0	0.01	2.47	0	0	0	16.5676	0	0
19_0040	2	0	14	152	0	0	0	17	51	0	0.03	5.55	0.02	0.01	0	15.2372	0	0
19_0041	1	0	1	92	24	0	0	27	21	1	0.01	20.82	0.02	0.05	0	51.8973	0	0
19_0042	1709	480	1	141	0	134	685	4	30	0	8.94	11.67	0.02	0.01	20.7366	20.4561	0	0
19_0043	1423	399	0	22	0	2	33	0	0	0	0.15	0.03	0	0	0.29051	0.01952	0	0
19_0044	1	0	1	80	142	0	0	10	23	2	0	21.15	0.02	0.02	0	32.426	0	0
19_0045	1	0	2	78	0	0	0	3	1	0	0.01	0.1	0	0	0	0.62263	0	0
19_0046	1	0	2	124	11	0	0	29	26	0	0	13.08	0.1	0.11	0	87.4318	0	0
19_0047	1	0	1	33	0	0	0	0	0	0	0.02	0.03	0	0	0	0.0244	0	0
19_0048	886	239	1	143	0	0	4	15	45	0	0.06	8.29	0.01	0.01	0.1946	26.5463	0	0
19_0049	1	0	1	113	0	0	0	20	35	0	0.05	4.94	0.01	0.01	0	12.3376	0	0
19_0050	142	25	1	135	0	0	0	8	33	0	0.02	0.68	0	0	0	0.0906	0	0
19_0051	2	0	0	43	94	0	0	14	26	0	0.01	0.33	0	0	0	1.77727	0	0
19_0052	1	0	3	127	0	0	0	32	30	0	0	2.89	0.03	0.01	0	25.3886	0	0
19_0053	1	0	20	148	0	0	0	3	2	0	0	0.05	0	0	0	0.31991	0	0
19_0054	690	180	1	137	0	0	4	3	17	0	0.06	0.69	0	0	0.1176	2.05879	0	0
19_0055	167	45	0	2	0	0	1	4	10	0	0.02	0.28	0.03	0	0	0	0	0
19_0056	1	0	2	101	0	0	0	1	6	0	0.04	0.05	0	0	0	0.43188	0	0
19_0057	6	0	0	122	0	0	0	0	2	0	0.02	0.09	0	0	0	0.46226	0	0
19_0058	27	1	0	115	0	0	1	1	3	0	0.05	0.08	0	0	0	0.47351	0	0
19_0059	114	0	0	0	0	0	1	0	0	0	0.16	0.01	0	0	0.33147	0	0	0
19_0060	316	40	0	0	0	0	3	0	0	0	0.03	0	0	0	0.00959	0	0	0
19_0061	1	0	1483	62	0	0	0	23	0	0	0.04	0.56	0.11	0	0	3.03441	3.83435	0
19_0062	1	0	1599	78	0	0	0	274	3	0	0	0.25	0.59	0	0	0.86963	11.0238	0
19_0063	200	63	2	108	0	0	0	7	24	0	0.02	0.45	0	0	0	5.5488	0	0
19_0064	1070	228	1	126	0	0	7	3	14	0	1.12	6.03	0.02	0.02	3.40887	31.8251	0	0
19_0065	0	0	945	6	0	0	0	2	0	0	0.03	0.01	0.01	0	0	0	0.14505	0
19_0066	1	0	1674	50	0	0	0	70	0	0	0.04	0.03	0.03	0	0	0.14146	1.24315	0
19_0067	1705	454	1	148	0	146	732	18	45	0	6.08	5.59	0	0.01	16.9059	12.7311	0	0
19_0068	0	0	1	408	0	0	0	9	87	0	0.01	15.26	0.18	2.8	0	0	0	0
19_0069	1	0	0	91	77	0	0	0	0	0	0.03	0.25	0	0	0	0.7438	0	0
19_0070	178	39	1	98	0	0	0	4	16	0	0.02	0.59	0	0	0	5.83081	0	0
19_0071	1	0	1	2	20	0	0	0	0	0	0.03	0.02	0	0	0	0.01823	0	0
19_0072	1	0	2	168	20	0	0	21	49	0	0.01	2.91	0.01	0.01	0	15.1846	0	0
19_0073	1	0	2	153	0	0	0	22	38	0	0.01	1.17	0	0.01	0	7.06419	0	0
19_0074	1	0	1	146	0	0	0	6	43	0	0.09	0.31	0	0	0	0.78797	0	0
19_0075	1	0	1	146	0	0	0	7	47	0	0.02	0.6	0	0	0	1.81809	0	0
19_0076	1	0	0	135	0	0	0	1	9	0	0.03	0.33	0	0	0	1.12204	0	0
19_0077	2	0	0	0	0	0	0	0	0	0	0.01	0	0	0	0	0	0	0
19_0078	1702	386	6	157	0	125	732	38	51	0	9.36	17.89	0.03	0.04	24.0328	51.3201	0	0
19_0079	1700	386	4	149	0	123	732	19	48	0	14.35	9.84	0.02	0.02	34.2625	26.7194	0	0
19_0080	41	10	0	106	0	0	1	0	1	0	0.01	0.03	0	0	0	0.62299	0	0
19_0081	1710	386	4	151	0	123	732	36	50	0	17.01	22.65	0.04	0.04	34.5044	47.6531	0	0
19_0082	1	0	0	0	0	0	0	1	1	0	0.02	0	0	0	0	0	0	0
19_0083	1	0	0	84	118	0	0	0	13	1	0.02	0.73	0	0	0	5.70498	0	0
19_0084	2	0	0	69	125	0	0	1	0	0	0.06	0.08	0	0	0	0.15374	0	0
19_0085	1	0	0	73	103	0	0	0	0	0	0.1	0.21	0	0	0	0.41051	0	0
19_0086	0	0	2	104	0	0	0	2	9	0	0.01	7.92	0.02	0.02	0	30.624	0	0
19_0087	1	0	2	168	20	0	0	14	45	0	0.01	1.89	0.01	0.01	0	12.1785	0	0
19_0088	2	0	1	112	0	0	0	8	29	0	0.09	4.33	0.01	0	0.37339	13.8841	0	0
19_0089	1	0	0	67	0	0	0	0	1	0	0.01	0.06	0	0	0	0.23076	0	0
19_0090	9	4	0	33	0	0	0	0	0	0	0	0.03	0	0	0	0.09484	0	0
19_0091	2	0	1	419	0	0	0	0	13	0	0.01	1.02	0	0.01	0	5.6701	0	0.86383
19_0092	1	0	1	118	0	0	0	1	1	0	0.01	0.4	0	0	0	0.97926	0	0
19_0093	2	0	0	105	1	0	0	0	2	0	0.01	0.03	0	0	0	0.1973	0	0
19_0094	43	13	0	68	0	0	0	0	0	0	0.01	0.07	0	0	0	1.18192	0	0
19_0095	1	0	0	4	0	0	0	0	0	0	0.02	0.04	0	0	0	0	0	0
19_0096	1	0	1705	0	0	0	0	177	0	0	0.01	0	0.48	0	0	0	5.18801	0
19_0097	16	0	1	88	0	0	0	26	15	0	0	11.74	0.03	0.09	0	85.2551	0	0
19_0098	23	4	1	110	0	0	0	1	10	0	0.02	0.29	0	0	0	0.68472	0	0
19_0099	1	0	2	101	118	0	0	0	5	0	0.03	1.19	0.01	0.01	0	6.63781	0	0
19_0100	652	182	0	0	0	1	2	0	0	0	0.06	0	0	0	0.114	0	0	0
19_0101	819	173	0	4	0	0	4	0	0	0	0.05	0	0	0	0.1226	0	0	0
19_0102	2	0	0	0	0	0	0	0	0	0	0	0	0	0	0	0	0	0
19_0103	1	0	0	1	0	0	0	0	0	0	0.02	0.01	0	0	0	0	0	0
19_0104	732	220	1	125	0	0	2	1	8	0	1.94	20.21	1.72	0.08	2.61712	76.215	0	0
19_0105	1	0	0	0	0	0	0	0	0	0	0.01	0	0	0	0	0	0	0
19_0106	2	0	2	146	0	0	0	14	41	0	0.02	1.97	0.02	0.01	0	10.1659	0	0
19_0107	94	29	0	13	0	0	0	0	0	0	0.04	0.01	0	0	0	0.15714	0	0
19_0108	1	0	6	131	0	0	0	10	41	0	0.08	1.58	0.03	0	0	6.27218	0	0
19_0109	625	169	0	12	0	0	2	0	0	0	0.11	0.02	0	0	0.30358	0	0	0
19_0110	858	218	0	26	0	1	4	0	0	0	0.42	0.23	0	0	0.89726	1.18623	0	0
19_0111	206	32	2	142	0	0	0	15	44	0	0.03	17.52	0.01	0.01	0.00568	32.256	0	0
19_0112	697	169	2	141	0	1	4	17	43	0	0.09	8.89	0.01	0.01	0.16444	17.8523	0	0
19_0113	3	0	0	0	0	0	0	0	0	0	0.03	0	0	0	0	0	0	0
19_0114	1	0	0	0	0	0	0	0	0	0	0.03	0	0	0	0	0	0	0
19_0115	1	0	1	99	0	0	0	0	1	0	0.02	0.16	0	0	0	1.92126	0	0
19_0116	1	0	0	0	0	0	0	2	0	0	0.01	0	0	0	0	0	0	0
19_0117	1	0	0	20	54	0	0	0	0	0	0.01	0.04	0	0	0	0.24392	0	0
19_0118	1392	357	1	110	0	5	43	13	34	0	0.17	4.74	0	0.01	0.8099	13.9879	0	0
19_0119	1	0	1	96	142	0	0	1	9	2	0.03	6.28	0	0.01	0	22.8935	0	0
19_0120	1443	388	0	118	0	6	33	0	2	0	0.47	0.35	0	0	1.50158	2.07724	0	0
19_0121	1053	244	0	87	0	0	7	0	0	0	0.43	0.28	0	0	1.48761	1.59256	0	0
19_0122	1	0	0	1	0	0	0	0	0	0	0.02	0	0	0	0	0	0	0
19_0123	2	5	1	111	0	0	0	8	26	0	0	7.83	0.01	0.01	0	14.1442	0	0
19_0124	1	0	1	151	0	0	0	7	31	0	0	3.29	0	0	0	6.97062	0	0
19_0125	1	0	1	146	12	0	0	28	31	0	0.01	12.92	0.06	0.09	0	85.5985	0	0
19_0126	1098	152	0	0	0	2	38	0	0	0	0.61	0	0	0	1.99381	0	0	0
19_0127	1071	262	0	96	0	1	4	0	1	0	0.26	0.32	0	0	0.40521	0.70331	0	0
19_0128	0	0	11	91	0	0	0	1	0	0	0	0.63	0.01	0	0	2.04559	0	0
19_0129	48	16	1	125	0	0	1	6	31	0	0.03	1.75	0	0	0	4.36774	0	0
19_0130	70	15	2	141	0	0	0	22	44	0	0.01	20.35	0.02	0.05	0	36.1032	0	0
19_0131	1	0	0	102	0	0	0	0	1	0	0.01	0.46	0	0	0	0.85388	0	0
19_0132	18	0	1	148	0	0	0	11	31	0	0.02	1.02	0	0.01	0	10.9771	0	0
19_0133	1	0	1	78	0	0	0	16	23	0	0.04	15.38	0.02	0.01	0	30.765	0	0
19_0134	1	0	2	99	0	0	0	1	5	0	0.24	0.55	0	0	0	5.70408	0	0
19_0135	1675	457	1	126	0	87	551	21	37	0	1.35	14.02	0.01	0.01	4.05751	26.3208	0	0
19_0136	1	0	1581	119	0	0	0	293	35	0	0	24.69	3.59	0.05	0	57.0117	23.4393	0
19_0137	1634	446	1	135	0	42	293	12	46	0	0.67	6.21	0.1	0.01	2.48092	21.6248	0	0
19_0138	1	0	0	0	0	0	0	0	0	0	0	0	0	0	0	0	0	0
19_0139	1	0	20	160	0	0	0	21	39	0	0.01	0.71	0	0	0	8.78568	0	0
19_0140	1	0	0	113	0	0	0	0	2	0	0.02	0.09	0	0	0	0.57507	0	0
19_0141	67	12	1	163	0	0	0	2	28	0	0.02	4.07	0.01	0.01	0	11.0424	0	0
19_0142	0	0	2	266	0	0	0	22	39	0	0	20.45	0.07	0.17	0	90.44	0	0
19_0143	0	0	2	191	0	0	0	18	46	0	0	28.14	0.09	0.17	0	81.4348	0	0.17183
19_0144	344	90	2	128	0	0	0	4	18	0	0.06	1.67	0.01	0.01	0	11.1456	0	0
19_0145	1255	293	0	43	0	0	23	0	0	0	0.33	0.14	0	0	2.22418	1.16192	0	0
19_0146	1460	368	0	0	0	10	68	0	0	0	0.47	0	0	0	1.62712	0	0	0
19_0147	1199	316	1	141	0	0	9	1	10	0	0.6	2.96	0.03	0.03	1.52995	7.86963	0	0
19_0148	0	0	0	15	20	0	0	0	0	0	0	0.21	0	0	0	3.76799	0	0
19_0149	0	0	1688	148	0	0	0	131	43	0	0	27.66	0.62	0.03	0	43.788	2.99972	0
19_0150	1	0	2	149	0	0	0	12	36	0	0.02	1.48	0	0	0	5.99985	0	0
19_0151	1549	398	8	141	0	33	308	1	7	0	0.19	0.24	0	0	0.28223	0.33693	0	0
19_0152	1	0	1696	160	0	0	0	204	46	0	0.01	10.35	0.16	0.02	0	11.8241	2.12379	0
19_0153	1704	461	0	83	0	98	617	0	1	0	1.54	0.06	0	0	3.22146	0.32248	0	0
19_0154	1	0	1656	129	0	0	8	284	5	0	0.23	0.06	0.15	0	0.02527	0.85628	7.3488	0
19_0155	2	0	1724	147	0	0	0	298	35	0	0.01	1.43	0.05	0	0	4.20588	1.56079	0
19_0156	1	0	1300	114	0	0	1	17	6	0	0.02	0.36	0.03	0	0	0.53349	0.1479	0
19_0157	1	0	2	308	0	0	0	17	34	0	0.06	1.47	0.01	0.03	0	12.4084	0	0.13706
19_0158	1	0	0	35	118	0	0	0	1	0	0.01	0.21	0	0	0	0.24224	0	0
19_0159	0	0	1	125	118	0	0	31	40	1	0	65.34	0.03	0.07	0	90.5134	0	0
19_0160	1146	291	0	1	0	3	26	0	0	0	0.51	0.02	0	0	2.75685	0	0	0
19_0161	234	52	0	70	99	0	2	0	1	0	0.01	0.16	0	0	0	0.33287	0	0
19_0162	1409	373	2	143	0	18	122	20	44	0	1.05	31.55	0.02	0.02	2.43007	65.6926	0	0
19_0163	0	0	0	35	118	0	0	0	0	0	0.03	19.21	0	0	0	66.8632	0	0
P23C0	2	0	1	122	0	0	0	0	0	0	0.01	0.05	0.03	0	0	0.44079	0	0
P25C0	2	0	1	1	0	0	0	0	0	0	0.05	0	0.06	0	0	0	0	0
P38C0	2	0	0	1	0	0	0	0	0	0	0.03	0	0.06	0	0	0	0	0
P6C0	2	0	0	52	0	0	0	0	0	0	0.02	0	0.03	0	0	0.02809	0	0
P7C0	2	0	0	80	0	0	0	0	0	0	0.02	0.02	0.03	0	0	0.06429	0	0
P8C0	2	0	0	67	0	0	0	0	0	0	0.01	0.01	0.08	0	0	0.03222	0	0
