# Supplementary material for: Clinical Metagenomics Is Increasingly Accurate and Affordable to Detect Enteric Bacterial Pathogens in Stool
Source: Microorganisms. 2022 Feb 15;10(2):441. doi: 10.3390/microorganisms10020441 (PMC8880012; doi:10.3390/microorganisms10020441)
Supplement: Supplementary file 1 [file microorganisms-10-00441-s001.zip › Dataset 2_Accuracy Calculations.xlsx]

## Sheet: PCR and culture
	PCR = EBP and/or BF (exclude samples where PCR results conflict)
	All 304	culture pos PCR pos	culture neg PCR neg	culture pos PCR neg	culture neg PCR pos	Total	sens	spec	discrepant
	Campylobacter	45	103	1	17	166	0.978261	0.858333	0.108434
	Salmonella	18	104	2	2	126	0.9	0.981132	0.031746
	Shigella	5	104	0	12	121	1	0.896552	0.0991736
	STEC	34	93	0	21	148	1	0.815789	0.141892
	overall	102	404	3	52	561	0.971429	0.885965	0.0980392

## Sheet: Mg and culture
	All 304+6	culture pos Mg pos	culture neg Mg neg	culture pos Mg neg	culture neg Mg pos	Total	sens	spec
	Campylobacter	55	157	2	13	227	0.964912	0.923529
	Salmonella	37	132	5	2	176	0.880952	0.985075
	Shigella	7	159	1	5	172	0.875	0.969512
	STEC	34	153	7	3	197	0.829268	0.980769
	overall	133	601	15	23	772	0.898649	0.963141
	ValidationSet	culture pos Mg pos	culture neg Mg neg	culture pos Mg neg	culture neg Mg pos	Total	sens	spec
	Campylobacter	37	107	1	10	155	0.973684	0.91453
	Salmonella	27	89	3	1	120	0.9	0.988889
	Shigella	5	108	0	3	116	1	0.972973
	STEC	24	102	5	2	133	0.827586	0.980769
	overall	93	406	9	16	524	0.911765	0.962085

## Sheet: Mg and PCR
		PCR = EBP and/or BF (exclude samples where PCR results conflict)
	All 304+6	PCR pos Mg pos	PCR neg Mg neg	PCR pos Mg neg	PCR neg Mg pos	Total	sens	spec
	Campylobacter	56	178	6	0	240	0.903226	1
	Salmonella	15	232	5	2	254	0.75	0.991453
	Shigella	9	236	8	0	253	0.529412	1
	STEC	32	197	23	1	253	0.581818	0.994949
	overall	112	843	42	3	1000	0.727273	0.996454
	ValidationSet	PCR pos Mg pos	PCR neg Mg neg	PCR pos Mg neg	PCR neg Mg pos	Total	sens	spec
	Campylobacter	38	114	6	0	158	0.863636	1
	Salmonella	11	154	2	1	168	0.846154	0.993548
	Shigella	6	156	5	0	167	0.545455	1
	STEC	23	133	11	0	167	0.676471	1
	overall	78	557	24	1	660	0.764706	0.998208

## Sheet: Mg and composite
	All 304+6	comp pos Mg pos	comp neg Mg neg	comp pos Mg neg	comp neg Mg pos	Total	sens	spec
	Campylobacter	67	146	6	0	219	0.917808	1
	Salmonella	37	162	7	2	208	0.840909	0.987805
	Shigella	11	158	8	0	177	0.578947	1
	STEC	37	139	25	1	202	0.596774	0.992857
	overall	152	605	46	3	806	0.767677	0.995066
	ValidationSet	comp pos Mg pos	comp neg Mg neg	comp pos Mg neg	comp neg Mg pos	Total	sens	spec
	Campylobacter	46	92	5	0	143	0.901961	1
	Salmonella	27	108	4	1	140	0.870968	0.990826
	Shigella	7	104	5	0	116	0.583333	1
	STEC	26	96	13	0	135	0.666667	1
	overall	106	400	27	1	534	0.796992	0.997506

## Sheet: Specificity
		total that are culture neg and Mg pos	PCR pos	PCR neg	PCR nd/conflict	%PCRpos
	Campylobacter	10	9	0	1	0.9
	Salmonella	2	0	2	0	0
	Shigella	5	5	0	0	1
	STEC	3	3	0	0	1
	overall	20	17	2	1	0.85
