# Supplementary material for: Clinical Metagenomics Is Increasingly Accurate and Affordable to Detect Enteric Bacterial Pathogens in Stool
Source: Microorganisms. 2022 Feb 15;10(2):441. doi: 10.3390/microorganisms10020441 (PMC8880012; doi:10.3390/microorganisms10020441)
Supplement: Supplementary file 1 [file microorganisms-10-00441-s001.zip › Dataset 3 PERMANOVA_and_post_hoc.xlsx]

## Sheet: permCulture
Df

## Sheet: permPatient
Df

## Sheet: permExtraction
Df

## Sheet: permPlatform
Df

## Sheet: pairCulture
pairs

## Sheet: pairPatient
pairs

## Sheet: pairExtraction
pairs

## Sheet: pairPlatform
pairs
