# Supplementary material for: Clinical Metagenomics Is Increasingly Accurate and Affordable to Detect Enteric Bacterial Pathogens in Stool
Source: Microorganisms. 2022 Feb 15;10(2):441. doi: 10.3390/microorganisms10020441 (PMC8880012; doi:10.3390/microorganisms10020441)
Supplement: Supplementary file 1 [file microorganisms-10-00441-s001.zip › Dataset 4 Differential_Abundance_results.xlsx]

## Sheet: wilcoxresultsplus
taxa	Healthy	gastroenteritis	wilcoxp	wilcoxpadj
Bacteroides fragilis	2.15557	0.125553	0.000172865	0.0124463
Cystobacter fuscus	0.731663	0.1507	0.00266476	0.0198118
Hippea maritima	52.4194	0.122723	0.00069444	0.0198118
Acidithiobacillus caldus	63.3422	0.116698	0.00164049	0.0198118
Phocaeicola vulgatus	27.0154	0.13997	0.00150654	0.0198118
Phocaeicola dorei	8.64088	0.120648	0.0030268	0.0198118
Bacteroides helcogenes	1.13451	0.11509	0.00277932	0.0198118
Tannerella forsythia	1.68916	0.110363	0.00239876	0.0198118
Spirosoma pollinicola	0.813041	0.0927239	0.00231365	0.0198118
Dyadobacter fermentans	0.765898	0.0905539	0.00247231	0.0198118
Leadbetterella byssophila	0.542495	0.0939597	0.00294376	0.0198118
Nitratifractor salsuginis	0.493157	0.115595	0.0049368	0.0256218
Haliangium ochraceum	0.493003	0.133987	0.00498202	0.0256218
Desulfurella acetivorans	34.7936	0.107789	0.00487911	0.0256218
Escherichia fergusonii	0.104526	0.446574	0.0070638	0.0267276
Klebsiella pneumoniae	0.810924	12.0529	0.00716837	0.0267276
Sulfurimonas autotrophica	0.644579	0.137548	0.0063474	0.0267276
Syntrophobacter fumaroxidans	2.13883	0.120977	0.0063222	0.0267276
Halobacteriovorax marinus	21.349	0.111133	0.00742433	0.0267276
Blattabacterium sp. (Blattella germanica)	0.491641	0.0878905	0.00662442	0.0267276
Sulfurovum sp. NBC37-1	0.454016	0.12533	0.00903527	0.0286082
Anaeromyxobacter sp. Fw109-5	0.550066	0.123714	0.00894212	0.0286082
Ichthyobacterium seriolicida	0.441679	0.0944201	0.00913875	0.0286082
Desulfobacca acetoxidans	1.46945	0.128367	0.00968887	0.0290666
Shigella dysenteriae	0.0829913	0.668465	0.0113399	0.0295955
Desulfovibrio alaskensis	0.521495	0.134931	0.0112116	0.0295955
Candidatus Sulcia muelleri	0.533623	0.087942	0.0115094	0.0295955
Spirosoma rigui	0.641275	0.082382	0.0111859	0.0295955
Escherichia albertii	0.143641	0.580712	0.0135751	0.0337036
Escherichia coli	8.46487	186.771	0.014933	0.0358393
Klebsiella quasipneumoniae	0.0343791	0.230804	0.0170802	0.0377655
Citrobacter sp. FDAARGOS_156	0.0828319	0.363227	0.0170802	0.0377655
Citrobacter farmeri	0.0872589	0.592561	0.0173092	0.0377655
Syntrophus aciditrophicus	10.0807	0.117186	0.0183455	0.0385451
Parabacteroides distasonis	1.51008	0.127529	0.0187372	0.0385451
Desulfotalea psychrophila	0.316609	0.119723	0.0196078	0.0392155
Citrobacter werkmanii	0.0954443	0.282063	0.02721	0.0515557
Enterobacter hormaechei	0.0795799	0.181014	0.0265346	0.0515557
Candidatus Desulfovibrio trichonymphae	0.482475	0.134908	0.0402577	0.0724639
Owenweeksia hongkongensis	0.306999	0.0952752	0.0401731	0.0724639
Helicobacter acinonychis	0.387395	0.124262	0.0463048	0.0813157
Blattabacterium sp. (Nauphoeta cinerea)	0.383113	0.0901352	0.0516762	0.0885877
Helicobacter mustelae	0.384993	0.124464	0.0733415	0.122804
Shigella flexneri	0.233945	1.12132	0.0805203	0.131761
Citrobacter rodentium	0.140504	0.332317	0.0960454	0.153673
Citrobacter koseri	0.18153	0.405717	0.123128	0.192721
Citrobacter braakii	0.163372	0.288384	0.132953	0.203672
Fermentimonas caenicola	0.275613	0.101806	0.151878	0.227817
Polaribacter vadi	0.236944	0.108777	0.156619	0.230135
Shigella boydii	0.309939	0.525015	0.163104	0.234869
Klebsiella aerogenes	0.169596	0.267333	0.181588	0.25636
Klebsiella michiganensis	0.828623	0.439417	0.20332	0.28152
Klebsiella variicola	0.127842	0.238441	0.217601	0.295609
Shigella sonnei	0.201434	0.456038	0.230677	0.30543
Maribacter cobaltidurans	0.189989	0.105365	0.233314	0.30543
Elizabethkingia bruuniana	0.278235	0.0913325	0.256292	0.329519
Flavobacterium johnsoniae	0.177882	0.11922	0.354058	0.447231
Arenibacter algicola	0.156335	0.111641	0.370691	0.460168
Flavobacterium indicum	0.202995	0.107144	0.393639	0.480373
Porphyromonas asaccharolytica	0.127657	0.115091	0.485477	0.582572
Capnocytophaga stomatis	0.134821	0.106987	0.552052	0.651602
Citrobacter freundii	0.281866	0.35866	0.584648	0.668339
Elizabethkingia ursingii	0.163208	0.104182	0.584797	0.668339
Sulfurospirillum halorespirans	0.109479	0.151634	0.619895	0.686653
Capnocytophaga ochracea	0.13905	0.121267	0.61698	0.686653
Citrobacter amalonaticus	0.383425	0.337734	0.667958	0.728681
Salmonella bongori	0.179684	0.241856	0.693111	0.744836
Klebsiella oxytoca	0.371675	0.365529	0.892759	0.931575
Enterobacter cloacae	0.298433	0.244163	0.885012	0.931575
Salmonella enterica	0.587345	0.246524	0.916059	0.942232
Enterobacter asburiae	0.27241	0.196181	0.955042	0.968493
Sulfurospirillum multivorans	0.103489	0.14844	0.998031	0.998031

## Sheet: wilcoxresultsplusG
taxa	Healthy	gastroenteritis	wilcoxp	wilcoxpadj
Acidithiobacillus	63.3422	0.116698	0.00164049	0.0134009
Bacteroides	3.26093	0.277509	0.000642202	0.0134009
Citrobacter	1.66186	6.0752	0.00152782	0.0134009
Cystobacter	0.731663	0.1507	0.00266476	0.0134009
Dyadobacter	0.765898	0.0905539	0.00247231	0.0134009
Hippea	52.4194	0.122723	0.00069444	0.0134009
Klebsiella	2.57572	19.4304	0.0031907	0.0134009
Leadbetterella	0.542495	0.0939597	0.00294376	0.0134009
Phocaeicola	218.883	0.313776	0.00126836	0.0134009
Tannerella	1.68916	0.110363	0.00239876	0.0134009
Desulfurella	34.7936	0.107789	0.00487911	0.0149461
Escherichia	8.64963	361.869	0.00456841	0.0149461
Haliangium	0.493003	0.133987	0.00498202	0.0149461
Nitratifractor	0.493157	0.115595	0.0049368	0.0149461
Spirosoma	1.66811	0.220179	0.0059272	0.0156818
Sulfurimonas	0.644579	0.137548	0.0063474	0.0156818
Syntrophobacter	2.13883	0.120977	0.0063222	0.0156818
Halobacteriovorax	21.349	0.111133	0.00742433	0.0173234
Anaeromyxobacter	0.550066	0.123714	0.00894212	0.0182775
Ichthyobacterium	0.441679	0.0944201	0.00913875	0.0182775
Sulfurovum	0.454016	0.12533	0.00903527	0.0182775
Desulfobacca	1.46945	0.128367	0.00968887	0.0184969
Desulfovibrio	0.521495	0.134931	0.0112116	0.0204733
Parabacteroides	1.51008	0.127529	0.0187372	0.0314785
Syntrophus	10.0807	0.117186	0.0183455	0.0314785
Desulfotalea	0.316609	0.119723	0.0196078	0.0316741
Blattabacterium	0.923466	0.23605	0.0327073	0.0503399
Candidatus	0.868423	0.378156	0.0335599	0.0503399
Owenweeksia	0.306999	0.0952752	0.0401731	0.0581817
Helicobacter	0.974853	0.295372	0.0734323	0.102805
Fermentimonas	0.275613	0.101806	0.151878	0.205563
Polaribacter	0.236944	0.108777	0.156619	0.205563
Maribacter	0.189989	0.105365	0.233314	0.296946
Shigella	2.89163	5.79315	0.311381	0.384647
Arenibacter	0.156335	0.111641	0.370691	0.444829
Elizabethkingia	0.438744	0.228865	0.400463	0.467207
Enterobacter	0.60803	0.739435	0.509664	0.548869
Flavobacterium	0.392743	0.296113	0.500744	0.548869
Porphyromonas	0.127657	0.115091	0.485477	0.548869
Sulfurospirillum	0.229383	0.346163	0.662274	0.695388
Capnocytophaga	0.254277	0.265818	0.77858	0.77858
Salmonella	1.88448	0.938996	0.774277	0.77858

## Sheet: KWresults
taxa	ksp	kspadj
Klebsiella pneumoniae	0.000128206	0.00923082
Citrobacter sp. FDAARGOS_156	0.0115986	0.0759182
Sulfurimonas autotrophica	0.00818246	0.0759182
Cystobacter fuscus	0.00832758	0.0759182
Phocaeicola vulgatus	0.0107273	0.0759182
Phocaeicola dorei	0.00663819	0.0759182
Bacteroides fragilis	0.00317924	0.0759182
Bacteroides helcogenes	0.00977387	0.0759182
Tannerella forsythia	0.00942789	0.0759182
Spirosoma pollinicola	0.0107415	0.0759182
Leadbetterella byssophila	0.00300691	0.0759182
Hippea maritima	0.0153306	0.0919838
Acidithiobacillus caldus	0.0176822	0.0979324
Klebsiella quasipneumoniae	0.022784	0.117175
Shigella boydii	0.0323247	0.133594
Nitratifractor salsuginis	0.0331109	0.133594
Syntrophobacter fumaroxidans	0.0333984	0.133594
Dyadobacter fermentans	0.0284588	0.133594
Spirosoma rigui	0.0358188	0.135734
Parabacteroides distasonis	0.037854	0.136274
Salmonella enterica	0.0444375	0.139109
Sulfurovum sp. NBC37-1	0.0423373	0.139109
Blattabacterium sp. (Blattella germanica)	0.0434533	0.139109
Ichthyobacterium seriolicida	0.0487175	0.146153
Syntrophus aciditrophicus	0.050938	0.146701
Escherichia albertii	0.0613882	0.149831
Shigella dysenteriae	0.0619408	0.149831
Desulfurella acetivorans	0.0644267	0.149831
Halobacteriovorax marinus	0.0566584	0.149831
Owenweeksia hongkongensis	0.0645104	0.149831
Candidatus Sulcia muelleri	0.0582713	0.149831
Fermentimonas caenicola	0.0690554	0.155375
Anaeromyxobacter sp. Fw109-5	0.0766721	0.167285
Shigella sonnei	0.08335	0.167297
Haliangium ochraceum	0.0872475	0.167297
Desulfovibrio alaskensis	0.0882958	0.167297
Desulfobacca acetoxidans	0.0862713	0.167297
Elizabethkingia bruuniana	0.0866909	0.167297
Escherichia coli	0.0980807	0.181072
Klebsiella michiganensis	0.101323	0.182381
Desulfotalea psychrophila	0.105898	0.185967
Elizabethkingia ursingii	0.112041	0.19207
Klebsiella variicola	0.122423	0.204987
Citrobacter werkmanii	0.162642	0.241026
Salmonella bongori	0.151481	0.241026
Enterobacter cloacae	0.163685	0.241026
Enterobacter hormaechei	0.150938	0.241026
Helicobacter acinonychis	0.164031	0.241026
Helicobacter mustelae	0.158233	0.241026
Escherichia fergusonii	0.169504	0.244086
Shigella flexneri	0.177452	0.25052
Candidatus Desulfovibrio trichonymphae	0.185003	0.251325
Polaribacter vadi	0.18303	0.251325
Porphyromonas asaccharolytica	0.191204	0.254938
Citrobacter amalonaticus	0.198779	0.260219
Flavobacterium johnsoniae	0.207599	0.266913
Klebsiella aerogenes	0.211417	0.267053
Citrobacter farmeri	0.231697	0.287624
Arenibacter algicola	0.238095	0.290557
Blattabacterium sp. (Nauphoeta cinerea)	0.244923	0.293907
Flavobacterium indicum	0.289155	0.336983
Maribacter cobaltidurans	0.29018	0.336983
Citrobacter freundii	0.330856	0.360934
Citrobacter koseri	0.329775	0.360934
Citrobacter rodentium	0.318096	0.360934
Sulfurospirillum multivorans	0.329923	0.360934
Capnocytophaga ochracea	0.44634	0.479649
Klebsiella oxytoca	0.553264	0.585809
Citrobacter braakii	0.566435	0.591063
Enterobacter asburiae	0.657098	0.675872
Capnocytophaga stomatis	0.727719	0.737968
Sulfurospirillum halorespirans	0.812924	0.812924

## Sheet: KWresultsG
taxa	ksp	kspadj
Klebsiella	0.00323934	0.0453508
Leadbetterella	0.00300691	0.0453508
Salmonella	0.00132444	0.0453508
Bacteroides	0.00487602	0.0494964
Cystobacter	0.00832758	0.0494964
Phocaeicola	0.00626812	0.0494964
Sulfurimonas	0.00818246	0.0494964
Tannerella	0.00942789	0.0494964
Shigella	0.0107946	0.0503747
Acidithiobacillus	0.0176822	0.0641107
Hippea	0.0153306	0.0641107
Spirosoma	0.0183174	0.0641107
Dyadobacter	0.0284588	0.0919439
Nitratifractor	0.0331109	0.0935155
Syntrophobacter	0.0333984	0.0935155
Citrobacter	0.0380139	0.0939166
Parabacteroides	0.037854	0.0939166
Sulfurovum	0.0423373	0.098787
Ichthyobacterium	0.0487175	0.10697
Syntrophus	0.050938	0.10697
Halobacteriovorax	0.0566584	0.113317
Desulfurella	0.0644267	0.117802
Owenweeksia	0.0645104	0.117802
Fermentimonas	0.0690554	0.120847
Anaeromyxobacter	0.0766721	0.127877
Desulfobacca	0.0862713	0.127877
Desulfovibrio	0.0882958	0.127877
Elizabethkingia	0.0809801	0.127877
Haliangium	0.0872475	0.127877
Candidatus	0.10604	0.143667
Desulfotalea	0.105898	0.143667
Escherichia	0.12125	0.15914
Enterobacter	0.127465	0.162229
Helicobacter	0.161027	0.198916
Blattabacterium	0.174153	0.208984
Polaribacter	0.18303	0.213535
Porphyromonas	0.191204	0.217042
Flavobacterium	0.212518	0.234889
Arenibacter	0.238095	0.25641
Maribacter	0.29018	0.304689
Sulfurospirillum	0.447328	0.458238
Capnocytophaga	0.755494	0.755494
